# Supplementary material for: Clinical application of tumour whole genome sequencing in routine molecular diagnostics for solid cancer patients
Source: Research Square preprint supplement (doi:10.21203/rs.3.rs-5999963/v1), 2025-02-20
Supplement: Supplementary file 1 [file cca6fde845aaa8d592cf8b6b.xlsx]

## Sheet: Supp T1. Feasibility & Pt chars
Sample ID	Gender	Age at WGS result date, or request date if not successful/attempted (years)	Diagnosis at WGS request		Sample type	Attempt success	mTCP	Reason for fail or no WGS	If pass, consent for detailed analysis		Time between WGS request and sampling (in days)	Turnaround time from materials received at lab to reporting (in working days)
1	M	80.4403	Soft tissue (Spindle cell sarcoma)		Histology	PASS	19		YES		8.50634
2	M	79.0056	Lung (NSCLC)		Histology	PASS	18		YES		1.39702	6
3	F	69.4803	Lung (NSCLC)		Histology	PASS	40		YES		2.59533	13
4	M	78.97	Lung (NSCLC)		Histology	PASS (Second WGS)	28		YES		184.542	8
5	F	20.8493	Ovary (Embryonal cell carcinoma)		Histology	PASS	81		YES		0.64159	5
6	F	71.3613	Lung (SCLC)		Histology	No WGS		Missing blood sample
7	F	68.0347	CUP		Histology	PASS	59		YES		5.4846	6
8	M	28.0172	Colorectum (Colon; signet cell)		Histology	PASS	41		YES		3.43431	22
9	F	62.7177	Lung (NSCLC)		Histology	PASS	31		YES		7.41614	21
10	F	62.6164	Lung (NSCLC)		Histology	PASS (Second WGS)	20		YES		247.705	6
11	F	68.2318	Lung (NSCLC)		Histology	No WGS		Incorrect request
12	F	50.6462	CUP		Histology	PASS	77		YES		2.37659	7
13	F	50.6051	Colorectum (Colon)		Histology	PASS (Second WGS)	98		YES		140.383	6
14	F	71.6159	CUP		Histology	PASS	78		YES		8.49982	7
15	F	59.6895	Lung (NSCLC)		Histology	FAIL		Low pTCP			7.46765
16	M	24.5811	Lung (Carcinoid; atypical carcinoid)		Histology	PASS	65		YES		7.47869	8
17	M	77.4368	Lung (NSCLC)		Histology	PASS	67		YES		9.52955	3
18	F	70.7343	Lung (Carcinoid; atypical carcinoid)		Histology	PASS	66		YES		17.6144	10
19	M	31.8229	CUP		Histology	No WGS		Biopsy failure
20	M	74.5948	Lung (NSCLC)		Histology	PASS	51		YES		11.4752	4
21	F	67.4625	Lung (NSCLC)		Histology	PASS	35		YES		10.4773	7
22	F	54.2055	Kidney (Sarcomatoid dedifferentiated RCC)		Histology	PASS	19		YES		4.43859	6
23	M	24.6714	CUP		Histology	PASS	89		YES		6.48754	5
24	F	50.0055	CUP		Histology	No WGS		No tumour/no malignancy
25	M	72.5715	CUP		No sample	No WGS		Cancelled
26	F	68.7794	CUP		Histology	PASS	73		YES		1.37577	6
27	F	49.0034	Lung (NSCLC)		Histology	PASS	67		YES		11.3847	7
28	F	69.6966	Lung (NSCLC)		Histology	PASS	15		YES		48.5404	10
29	F	69.6118	Lung (NSCLC)		Histology	No WGS		No tumour/no malignancy
30	M	79.9036	Lung (LCNEC)		Histology	PASS	61		YES		4.51136	5
31	F	60.2563	Ovary (High grade serous carcinoma)		Histology	FAIL		Low DNA quantity			8.38755
32	F	76.7906	CUP		Histology	PASS	64		YES		7.42559	7
33	M	78.0665	Colorectum (Colon)		Histology	PASS	41		YES		7.47343	14
34	M	78.3813	CUP		Histology	PASS	53		YES		0.609527	7
35	M	73.3874	Lung (LCNEC)		Histology	PASS	21		YES		1.43079	5
36	M	85.3411	Lung (NSCLC)		Histology	PASS	21		YES		65.416	5
37	M	85.1413	Lung (NSCLC)		Histology	PASS (Second WGS)	15		YES		3.38168	8
38	F	72.7987	Lung (NSCLC)		Histology	FAIL		Low DNA quantity			23.4674
39	M	72.7932	Penis		Histology	FAIL	<15	Low final mTCP			7.5029
40	F	52.9159	Soft tissue (Spindle cell sarcoma)		Histology	No WGS		Incorrect request
41	F	51.8016	CUP		Histology	PASS	16		YES		19.3731	8
42	F	76.6181	Uterus/Endometrium		Histology	PASS	74		YES		0.601176	5
43	M	73.6529	Lung (NSCLC)		Histology	FAIL		Low pTCP			9.37619
44	M	69.0204	Soft tissue (Solitary fibrous tumour)		Histology	PASS	90		YES		9.39386	4
45	M	52.0726	Kidney (Clear cell RCC)		Histology	PASS	39		YES		6.3741	6
46	F	63.4268	Lung (NSCLC)		Histology	No WGS		Incorrectly processed
47	F	51.6291	Ovary (High grade serous carcinoma)		Histology	PASS	41		YES		0.683193	5
48	F	73.2915	Lung (NSCLC)		Histology	No WGS		Biopsy failure
49	F	50.4189	Breast (TNBC)		Histology	PASS	32		YES		0.60776	9
50	M	59.2898	Lung (NSCLC)		Histology	PASS	19		YES		21.4139	5
51	F	49.1759	Lung (NSCLC)		Histology	PASS	81		YES		10.3871	6
52	M	66.0169	Prostate		Histology	PASS	69		YES		7.50061	5
53	F	41.0442	Soft tissue (Liposarcoma)		Histology	PASS	82		YES		3.45757	9
54	F	71.9965	Soft tissue (High grade undifferentiated spindle cell/pleomorphic sarcoma)		Histology	PASS	62		YES		14.4918	5
55	M	69.2339	Mesothelioma		Histology	PASS	28		YES		13.3877	5
56	F	77.6832	Breast (ER positive, Her2 negative)		Histology	PASS	50		YES		2.37001	4
57	M	70.978	Mesothelioma		Histology	PASS	65		YES		1.48298	7
58	F	53.447	Lung (NSCLC)		Histology	PASS	35		YES		4.61419	6
59	M	48.8747	Colorectum (Rectum)		Histology	PASS	46		YES		0.607228	5
60	M	74.0499	Prostate		Histology	No WGS		No tumour/no malignancy
61	F	47.4346	Lung (Carcinoid; atypical carcinoid)		Histology	PASS	19		YES		11.4489
62	F	58.5861	Lung (LCNEC)		Histology	No WGS		Cancelled
63	F	57.9263	Colorectum (Colon)		Histology	PASS	89		YES		8.53379	5
64	M	56.3492	Lung (NSCLC)		Histology	PASS	44		YES		8.43524	8
65	F	64.1332	Lung (NSCLC)		Histology	PASS	15		YES		8.41261	7
66	M	81.8968	Melanoma		Histology	No WGS		Cancelled
67	F	34.8209	GIST		Histology	PASS	58		YES		8.38923	6
68	M	63.6267	Lung (NSCLC)		Histology	PASS	56		YES		14.421	8
69	M	54.5778	Mesothelioma		Histology	PASS	59		YES		8.40631	5
70	M	62.9066	Lung (NSCLC)		Histology	No WGS		No tumour/no malignancy
71	F	60.9763	Melanoma		Histology	PASS	17		YES		4.39787	5
72	M	72.2456	Skin (SCC)		Histology	FAIL	10	Low final mTCP			0.487931	5
73	M	52.6092	Salivary gland (Acinary cell)		Histology	PASS	77		YES		10.3822	5
74	M	57.0611	Small intestine (Jejunum)		Histology	PASS	54		YES		24.4375	6
75	M	55.8838	Head and neck (Nasopharynx)		Histology	PASS	62		YES		1.64948	8
76	F	77.0699	Lung (NSCLC)		Histology	PASS	27		YES		13.3879	5
77	M	67.6076	Prostate		Histology	PASS	44		YES		23.4588	5
78	M	61.2145	Prostate		Histology	PASS	61		YES		14.3948	4
79	F	49.4059	Lung (NSCLC)		Histology	PASS	64		YES		4.37592	8
80	M	73.9459	Mesothelioma		Histology	PASS	41		YES		8.49179	5
81	M	62.5397	Thyroid (Mixed papillary/anaplastic carcinoma)		Histology	PASS	16		YES		0.6105	5
82	F	47.8343	Colorectum (Sigmoid)		Cytology	No WGS		No tumour/no malignancy
83	F	73.6666	Uterus/Endometrium		Histology	PASS	88		YES		0.627536	7
84	M	69.5159	Mesothelioma		Histology	PASS	42		YES		12.4848	4
85	M	60.029	Bladder (UCC)		Histology	PASS	34		YES		12.5147	7
86	F	55.9221	Vagina (SCC)		Histology	PASS	58		YES		0.504815	6
87	M	74.9151	CUP		Histology	PASS	49		YES		7.51758	5
88	F	42.5364	CUP		Histology	PASS	46		YES		11.3977	5
89	M	60.7108	Lung (NSCLC)		Histology	FAIL		Low DNA quantity			3.4593
90	M	69.62	CUP		Histology	PASS	65		YES		14.4403	7
91	M	33.2165	Pancreas (Neuro-endocrine; NET)		Histology	PASS	74		YES		28.452	4
92	F	33.441	CUP		Histology	PASS	48		YES		14.402	6
93	F	65.6774	GIST		Histology	PASS	100		YES		-385.383	6
94	F	52.1411	CUP		Histology	PASS	67		YES		5.48483	5
95	F	53.3841	Urothelial tract (UCC)		Histology	No WGS		No tumour/no malignancy
96	M	56.0919	Oesophagus/Stomach (Stomach)		Histology	PASS	16		YES		-1240	5
97	M	68.2757	Urothelial tract (Urethra; adenocarcinoma)		Histology	PASS	79		YES		6.65713	10
98	M	72.0814	Soft tissue (PEComa)		Histology	PASS	66		YES		15.5309	5
99	M	64.8149	Lung (NSCLC; sarcomatoid carcinoma)		Histology	PASS	35		YES		10.3777	5
100	F	46.0902	Lung (NSCLC)		Histology	PASS	36		YES		7.48086	4
101	M	70.9424	Soft tissue (Sarcoma NOS)		Histology	PASS	19		YES		10.5628	6
102	F	66.6959	Lung (NSCLC)		Histology	FAIL	14	Low final mTCP			10.4728	4
103	M	40.0531	Lung (NSCLC)		Histology	PASS	69		YES		6.60871	4
104	F	68.0429	Lung (NSCLC)		Histology	PASS	39		YES		7.48886	4
105	M	58.0139	Soft tissue (Solitary fibrous tumour)		Histology	No WGS		Cancelled
106	M	73.1382	Lung (NSCLC)		Histology	PASS	49		YES		14.6386	7
107	F	72.6344	Colorectum (Colon)		Histology	PASS	53		YES		18.4977	4
108	F	37.5698	Lung (NSCLC)		Histology	PASS	31		YES		11.576	6
109	F	57.5183	Ovary (Transitional cell/high grade serous carcinoma)		Histology	PASS	91		YES		132.756	4
110	F	64.919	Lung (NSCLC)		Histology	PASS	42		YES		11.4868	4
111	M	82.8578	Lung (NSCLC)		Histology	PASS	19		YES		13.7119	5
112	M	71.5475	Colorectum (Colon)		Histology	PASS	16		YES		13.6797	6
113	F	70.2716	Colorectum (Colon)		Histology	PASS	15		YES		-2.56479	4
114	F	65.7431	Lung (NSCLC)		Histology	PASS	53		YES		9.69267	5
115	F	44.7404	Soft tissue (Small blue round cell tumour)		Histology	PASS	98		YES		-5.46853	6
116	F	65.9238	Lung (NSCLC)		Histology	PASS	47		YES		-272.573	5
117	M	52.9296	Lung (NSCLC)		Histology	PASS	70		YES		10.3826	4
118	F	65.8416	Lung (NSCLC)		Histology	PASS (Second WGS)	17		YES		9.48467	7
119	F	64.1934	Lung (NSCLC)		Histology	No WGS		Incorrect request
120	F	54.8489	Uterus/Endometrium (Carcinosarcoma)		Histology	PASS	60		YES		9.58527	8
121	F	65.0476	CUP		Histology	PASS	22		YES		19.5274	4
122	F	54.7777	Uterus/Endometium (Carcinosarcoma)		Histology	FAIL (Second WGS)		Low pTCP			-105.295
123	M	64.4754	Lung (NSCLC)		Histology	PASS	32		YES		6.37764	4
124	M	75.9829	Lung (NSCLC)		Histology	PASS	38		YES		1.41581	6
125	M	82.2418	Lung (NSCLC)		Cytology	No WGS		Biopsy failure
126	M	80.1856	Lung (Carcinoid; atypical carcinoid)		Histology	PASS	59		YES		10.4777	5
127	F	55.7661	Lung (NSCLC)		Histology	PASS	23		YES		12.4224	5
128	F	71.5885	Lung (NSCLC)		Histology	PASS	17		YES		8.39069	5
129	F	65.2366	Lung (NSCLC)		Histology	No WGS		Missing blood sample
130	F	62.8819	Lung (NSCLC)		Histology	FAIL		Low pTCP			4
131	F	43.0703	Colorectum (Colon)		Histology	PASS	40		YES		-957.549	6
132	F	79.252	Lung (NSCLC)		Histology	PASS	70		YES		9.51687	11
133	F	78.8577	Lung (LCNEC)		Histology	No WGS		No tumour/no malignancy
134	F	64.6205	Lung (NSCLC)		Histology	FAIL		Low pTCP			9.47057
135	F	75.011	Lung (NSCLC)		Histology	FAIL	<15	Low final mTCP			1.65269
136	F	73.7734	Lung (NSCLC)		Histology	PASS	52		YES		2.48398	5
137	F	61.4308	Ovary (Low grade serous carcinoma)		Histology	PASS	73		YES		9.48354	10
138	F	27.7872	Ovary (Low grade serous carcinoma)		Histology	PASS	24		YES		14.4175	10
139	M	56.9324	CUP		Histology	No WGS		No tumour/no malignancy
140	F	74.5455	Lung (NSCLC)		Cytology	PASS	15		YES		-1.36602	10
141	F	64.7355	Lung (Carcinoid; atypical carcinoid)		Histology	PASS	78		YES		8.52984	9
142	M	43.533	Oesophagus/Stomach (GEJ; adenocarcinoma)		Histology	PASS	75		YES		-12.5149	6
143	M	38.9716	Colorectum (Rectum)		Histology	PASS	34		YES		-62.469	5
144	F	69.8281	Lung (NSCLC)		Histology	PASS	69		YES		6.36999	4
145	M	46.8623	Oesophagus/Stomach (Stomach; adenocarcinoma/sarcomatoid carcinoma)		Histology	PASS	95		YES		-16.437	10
146	F	62.7971	Mesothelioma		Histology	No WGS		No tumour/no malignancy
147	M	62.7971	Mesothelioma		Histology	No WGS		Incorrect request
148	M	64.8669	Lung (NSCLC)		Cytology	FAIL		Low pTCP			0.474662
149	M	71.6187	Lung (NSCLC)		Histology	PASS	62		YES		3.63376	11
150	M	65.9375	Colorectum (Rectum)		Histology	PASS	42		YES		11.5165	6
151	M	71.4051	Lung (NSCLC)		Histology	FAIL	10	Low final mTCP			10.6344	8
152	F	64.6342	Lung (NSCLC)		Cytology	FAIL		Low pTCP			0.618067
153	F	52.048	Breast (ER positive, Her2 negative)		Histology	PASS	85		YES		-96.5716	4
154	F	79.471	Lung (NSCLC)		Histology	PASS	43		YES		10.4592	6
155	M	67.2654	CUP		Histology	PASS	49		YES		2.59765	6
156	M	62.8162	CUP		Histology	PASS	25		YES		2.70559	11
157	M	74.77	Lung (NSCLC)		Histology	PASS	17		YES		10.466	8
158	M	77.089	Soft tissue (Epidemic Kaposisarcoma)		Histology	PASS	16		YES		2.61733	9
159	F	60.0099	Lung (NSCLC)		Histology	PASS	43		YES		9.3982	10
160	F	44.2367	Thymus		Histology	PASS	24		YES		42.4821	7
161	F	55.5416	Breast (TNBC)		Histology	PASS	91		YES		8.36709	6
162	F	45.6905	Lung (NSCLC)		Histology	PASS	20		YES		39.3918	6
163	M	50.8789	Brain/central nervous system (Olfactory neuroblastoma)		Histology	PASS	64		YES		-24.3548	6
164	F	70.4605	Lung (NSCLC)		Histology	PASS	23		YES		4.51854	9
165	M	61.0174	Mesothelioma		Histology	No WGS		No tumour/no malignancy
166	M	61.0174	Mesothelioma		Histology	No WGS		Biopsy failure
167	M	69.0614	Melanoma		Histology	PASS	59		YES		2.48164	9
168	M	56.404	Prostate		Histology	PASS	58		YES		9.50863	6
169	M	78.2855	Bladder (UCC)		Histology	FAIL		Low DNA quantity			14.372
170	F	48.6721	CUP		Histology	No WGS		Cancelled
171	M	60.4835	Prostate		Histology	FAIL		Low pTCP			6.42967
172	F	50.6571	Lung (NSCLC)		Cytology	PASS	35		YES		1.51147	6
173	M	61.8826	Oesophagus/Stomach (GEJ; adenocarcinoma)		Histology	PASS	62		YES		4.62067	9
174	F	51.5634	GIST (Quadruple wildtype)		Histology	PASS	96		YES		-1	9
175	F	27.5928	Lung (Carcinoid; atypical carcinoid)		Histology	PASS	52		YES		7.65016	8
176	F	52.3929	Mesothelioma		Histology	PASS	54		YES		11.3913	3
177	M	78.9262	CUP		Histology	PASS	38		YES		6.67255	5
178	F	32.9756	Lung (NSCLC)		Histology	PASS	21		YES		16.3667	6
179	M	66.4823	CUP		Histology	PASS	17		YES		16.3852	7
180	M	60.9599	Lung (NSCLC)		Histology	FAIL		Low pTCP			15.4385
181	F	74.3155	Lung (NSCLC)		Cytology	No WGS		Incorrect request
182	M	78.3759	Lung (NSCLC)		Histology	PASS	24		YES		16.3865	9
183	M	78.5538	Mesothelioma		Histology	PASS	15		YES		0.648222	5
184	M	65.1353	Mesothelioma		Histology	PASS	73		YES		12.4877	6
185	M	70.2689	CUP		Histology	PASS	62		YES		15.5099	9
186	F	53.4416	Bladder (UCC)		Histology	FAIL		Low DNA quantity			5.52129
187	F	57.5156	Breast (ER positive, Her2 negative)		Histology	FAIL		Low pTCP			0.601619
188	F	73.9185	Breast (ER positive, Her2 positive)		Histology	PASS	24		YES		5.4742	8
189	M	62.6574	Mesothelioma		Histology	PASS	68		YES		0.529502	8
190	M	68.544	Mesothelioma		Histology	PASS	20		YES		4.46918	8
191	F	52.0288	Lung (NSCLC)		Cytology	PASS	54		YES		32.4706	7
192	F	51.8946	Lung (NSCLC)		Histology	No WGS		No tumour/no malignancy
193	F	35.5383	Breast (ER positive, Her2 negative)		Histology	PASS	49		YES		-20.312	6
194	F	66.726	Breast (ER positive, Her2 negative)		Histology	PASS	84		YES		1.59921	8
195	M	65.4173	Mesothelioma		Histology	PASS	33		YES		8.44791	10
196	M	63.9278	Colorectum (Rectum)		Cytology	FAIL		Low pTCP			9.64779
197	M	61.1461	Lung (NSCLC)		Cytology	FAIL		Low pTCP			0.56805
198	F	52.8091	Lung (NSCLC)		Cytology	FAIL		Low pTCP			0.67803
199	F	39.1441	Lung (NSCLC)		Cytology	FAIL		Low pTCP			0.59625
200	M	71.0191	Mesothelioma		Histology	PASS	60		YES		6.50974	6
201	M	43.7521	Oesophagus/Stomach (Stomach)		Histology	PASS	17		YES		15.5925	8
202	F	62.4849	Lung (NSCLC)		Histology	PASS	65		YES		6.39836	7
203	F	75.063	Ovary (High grade serous carcinoma)		Histology	PASS	36		YES		0.389283	7
204	F	54.0248	Lung (NSCLC)		Histology	PASS	50		YES		13.4351	9
205	F	49.3456	CUP		Histology	PASS	17		YES		13.4683	7
206	M	75.7858	Lung (Carcinoid; atypical carcinoid)		Histology	PASS	94		YES		525.398	3
207	M	56.9571	Head and neck (SCC)		Histology	FAIL		Low pTCP			16.4047
208	M	74.3292	Lung (Carcinoid; atypical carcinoid)		Histology	FAIL (Second WGS)		Low DNA quantity			23.3921
209	F	60.9298	Lung (NSCLC)		Histology	PASS	48		YES		13.6462	7
210	M	72.9958	Lung (Carcinoid; atypical carcinoid)		Histology	PASS	77		YES		21.5007	6
211	M	45.0635	CUP		Histology	PASS	82		YES		33.3751	3
212	M	70.8767	Lung (NSCLC)		No sample	No WGS		Cancelled
213	M	44.9567	Lung (NSCLC)		Histology	FAIL (Second WGS)		Low pTCP			7.54902
214	M	45.8356	Lung (NSCLC)		Cytology	No WGS		Biopsy failure
215	M	59.1063	Bone (Osteosarcoma)		Histology	PASS	80		YES		-6.31662	6
216	M	68.4646	Prostate		Histology	PASS	37		YES		15.504	9
217	F	69.3681	Soft tissue (High grade pleomorphic sarcoma)		Histology	PASS	71		YES		-118.538	6
218	F	51.484	Lung (NSCLC)		Cytology	PASS	15		YES		0.668145	7
219	F	47.8644	CUP		Histology	PASS	45		YES		3.52503	8
220	M	75.4216	Mesothelioma		Histology	PASS	33		YES		9.48204	8
221	F	63.0818	Melanoma		Histology	PASS	62		YES		16.491	8
222	F	48.9788	Soft tissue (Clear cell sarcoma)		Histology	PASS	95		YES		0.628964	8
223	F	48.2806	Colorectum (Rectum)		Histology	PASS	58		YES		-50.3959	7
224	M	83.0851	Prostate		Histology	PASS	84		YES		13.4969	6
225	F	61.0421	Lung (NSCLC)		Cytology	PASS	37		YES		0.649532	6
226	F	67.8841	Lung (NSCLC)		Cytology	FAIL		Low pTCP			0.613694
227	M	76.0349	CUP		Histology	PASS	15		YES		-13.5775	5
228	M	56.6532	Prostate		Histology	PASS	72		YES		7.51336	7
229	F	77.1493	Lung (LCNEC)		Histology	PASS	46		YES		20.5214	6
230	M	76.3142	Prostate		Histology	PASS	64		YES		8.52324	5
231	M	63.7909	Lung (NSCLC)		Cytology	PASS	62		YES		11.5983	7
232	M	47.1224	Colorectum (Rectum)		Histology	PASS	34		YES		7.65463	8
233	F	69.0341	Colorectum (Colon)		Histology	PASS	74		YES		12.4007	8
234	F	57.8661	CUP		Histology	PASS	67		YES		0.577741	5
235	M	38.8731	Bladder (UCC)		Histology	PASS	64		YES		-5.38794	10
236	M	59.0187	Thymus		Histology	PASS	17		YES		6.45408	8
237	M	65.0531	CUP		Histology	PASS	70		YES		10.5098	5
238	F	72.2648	Lung (NSCLC)		Histology	PASS	49		YES		9.59988	12
239	M	64.9984	CUP		Histology	PASS (Second WGS)	31		YES		107.605	8
240	F	71.0464	Lung (LCNEC)		Histology	No WGS		Incorrectly processed
241	M	54.7092	CUP		Histology	No WGS		Cancelled
242	F	75.6927	Lung (NSCLC)		Histology	PASS	67		YES		7.6843	5
243	M	65.7075	Lung (NSCLC)		Histology	PASS	47		YES		8.38779	4
244	M	65.5268	Lung (NSCLC)		Histology	PASS	47		YES		29.4203	8
245	F	61.9209	CUP		Histology	FAIL	14	Low final mTCP			7.66671	4
246	F	63.717	Lung (NSCLC)		Histology	FAIL		Low DNA quantity			8.47386
247	M	65.4118	Lung (NSCLC)		Cytology	FAIL		Low pTCP			-83.4899
248	F	68.3304	Lung (NSCLC)		Histology	FAIL	<15	Low final mTCP			5.50223
249	M	78.7126	CUP		Histology	PASS	15		YES		11.419	7
250	F	42.3393	Lung (NSCLC)		Histology	FAIL	<15	Low final mTCP			0.727174
251	M	50.7748	CUP		Histology	PASS	59		YES		8.52078	4
252	M	66.9998	CUP		Histology	FAIL	14	Low final mTCP			11.4393	6
253	F	74.1704	Ovary		Histology	PASS	28		YES		-3.3433	7
254	M	58.8353	Prostate		Histology	PASS	29		YES		8.4115	5
255	M	72.7522	Mesothelioma		Histology	PASS	46		YES		0.463817	5
256	F	67.279	CUP		Histology	PASS	40		YES		6.39483	6
257	M	36.5896	Mesothelioma		Histology	PASS	26		YES		5.3827	4
258	M	73.7241	Mesothelioma		Histology	FAIL		Low pTCP			14
259	F	60.8422	Lung (Carcinoid; typical carcinoid)		Histology	PASS	79		YES		12.4455	4
260	F	61.4774	CUP		Histology	PASS	20		YES		7.37757	4
261	F	68.2401	Ovary (High grade serous carcinoma)		Histology	PASS	35		YES		0.445736	5
262	M	65.2968	Lung (NSCLC)		Histology	PASS	41		YES		10.4214	5
263	F	57.2719	Breast (ER positive, Her2 negative)		Histology	PASS	32		YES		43.4004	6
264	F	67.4187	Breast (ER positive, Her2 negative)		Histology	No WGS		Cancelled
265	F	57.1296	Breast (ER positive, Her2 negative)		Histology	FAIL		Low pTCP			9.42181
266	M	57.1624	CUP		Histology	PASS	18		YES		8.60081	7
267	F	48.2149	Breast (TNBC)		Histology	PASS	24		YES		9.45008	6
268	F	72.6673	CUP		Histology	PASS	62		YES		9.43286	6
269	M	74.321	Prostate		Histology	PASS	60		YES		14.4856	9
270	F	43.1661	Lung (NSCLC)		Histology	FAIL		Low pTCP			22.5046
271	F	54.6928	Breast (ER positive, Her2 negative)		Histology	PASS	36		YES		14.541	7
272	M	71.5557	CUP		Histology	PASS	22		YES		22.5012	5
273	F	38.9662	Lung (SCLC)		Histology	PASS	82		YES		0.642728	6
274	F	70.9013	Lung (NSCLC)		Histology	PASS	48		YES		12.5292	5
275	F	72.4702	Lung (NSCLC)		Histology	PASS	40		YES		11.4846	8
276	M	80.0843	Lung (NSCLC)		No sample	No WGS		Cancelled
277	M	78.0418	Mesothelioma		Histology	PASS	58		YES		3.50077	6
278	F	70.5974	Uterus/Endometrium		Histology	PASS	50		YES		-1	8
279	M	50.909	Urachus (Adenocarcinoma)		Histology	FAIL	12	Low final mTCP			-52.5563	10
280	M	60.5082	Prostate		Histology	No WGS		Cancelled
281	M	78.0062	Mesothelioma		Histology	FAIL (Second WGS)		Low pTCP			49.5208
282	M	22.388	Soft tissue (Alveolar soft part sarcoma)		Histology	PASS	34		YES		2.63699	6
283	F	68.6343	CUP		Histology	PASS	78		YES		8.58032	7
284	M	62.9477	CUP		Histology	PASS	33		YES		9.40557	8
285	F	50.0904	Melanoma		Histology	PASS	24		YES		13.3971	5
286	M	52.2752	Mesothelioma		Histology	PASS	44		YES		20.4853	6
287	F	65.4474	Lung (NSCLC)		Histology	No WGS		No tumour/no malignancy
288	M	71.9527	Lung (NSCLC)		Histology	FAIL	11	Low final mTCP			7.39719	7
289	F	55.4457	Lung (NSCLC)		Histology	No WGS		Incorrect request
290	F	78.2855	Lung (NSCLC)		Histology	PASS	57		YES		-7.55335	6
291	F	74.7125	Lung (NSCLC)		Histology	PASS	38		YES		7.66289	5
292	M	77.9515	Lung (NSCLC)		Histology	PASS	16		YES		15.3972	5
293	F	71.9034	Lung (NSCLC)		Histology	PASS	57		YES		18.4748	6
294	M	73.2231	Lung (LCNEC)		Histology	PASS	57		YES		14.4974	5
295	M	72.9493	Soft tissue (Radiation-associated angiosarcoma)		Histology	No WGS		No tumour/no malignancy
296	F	65.42	Bladder (UCC)		Histology	PASS	82		YES		13.4157	4
297	M	48.2067	CUP		Histology	PASS	51		YES		13.4293	5
298	M	67.2873	Urothelial tract (UCC)		Histology	PASS	24		YES		9.38503	4
299	F	46.7939	Lung (NSCLC)		Histology	FAIL	<15	Low final mTCP			13.3887
300	F	54.4875	CUP		Histology	PASS	16		YES		0.615843	9
301	M	51.7495	Urothelial tract		Histology	PASS	29		YES		14.443	6
302	F	67.1558	Lung (NSCLC)		Histology	PASS	25		YES		19.3935	8
303	F	46.2052	Melanoma		Histology	FAIL		Low DNA quantity			14.5063
304	F	75.0438	Lung (NSCLC)		Histology	PASS	35		YES		10.6987	5
305	M	76.2868	Prostate		Histology	PASS	94		YES		18.5059	10
306	F	73.8282	Lung (NSCLC)		Histology	PASS	16		YES		-3.48966	5
307	F	62.1646	Lung (NSCLC)		Histology	PASS	35		YES		8.63309	9
308	F	82.8715	Lung (NSCLC)		Histology	PASS	34		YES		9.48358	10
309	M	60.489	Lung (NSCLC)		Histology	PASS	76		YES		16.394	10
310	M	79.5148	Prostate		Histology	PASS	81		YES		15.4032	10
311	F	61.4582	Colorectum (Colon)		Histology	PASS	38		YES		7.56395	5
312	F	62.1071	Lung (NSCLC)		Cytology	FAIL (Second WGS)		Low pTCP			0.672703
313	F	32.2829	Head and neck (SCC)		Histology	PASS	47		YES		1.43714	7
314	M	63.3447	Mesothelioma		Histology	PASS	55		YES		10.5317	5
315	M	77.7708	Lung (NSCLC)		Histology	PASS	31		YES		16.4637	10
316	M	77.6914	Lung (NSCLC)		Histology	PASS (Second WGS)	18		YES		-525.43	5
317	F	75.9336	Mesothelioma		Histology	PASS	18		YES		13.5133	4
318	F	51.4757	CUP		Histology	FAIL		Low DNA quantity			14.4536
319	F	27.2287	Soft tissue (Spindle cell sarcoma)		Histology	PASS	15		YES		13.4307	9
320	F	63.0024	Lung (NSCLC)		Histology	No WGS		No tumour/no malignancy
321	F	63.1256	Lung (Carcinoid; typical carcinoid)		Histology	PASS	76		YES		50.4723	4
322	M	46.8048	Colorectum (Sigmoid)		Histology	PASS	65		YES		-25.4502	6
323	M	45.9889	Colorectum (Sigmoid; adenocarcinoma)		Histology	No WGS		Incorrect request
324	F	49.8768	Breast (ER positive, Her2 negative)		Histology	PASS	46		YES		42.4157	6
325	F	67.8869	Breast (ER positive, Her2 negative)		Cytology	No WGS		No tumour/no malignancy
326	F	67.8869	Breast (ER positive, Her2 negative)		Cytology	No WGS		No tumour/no malignancy
327	M	63.613	Soft tissue (Pleiomorphic sarcoma)		Histology	No WGS		Incorrect request
328	M	57.8332	Lung (NSCLC)		Histology	PASS	32		YES		0.616492	9
329	M	73.2559	Colorectum (Colon)		Histology	PASS	71		YES		-344.375	10
330	F	60.1002	Breast (TNBC)		Histology	PASS	48		YES		9.41202	6
331	F	64.7246	Lung (NSCLC)		Cytology	No WGS		Biopsy failure
332	M	76.8262	Prostate (Adenocarcinoma)		Histology	FAIL	11	Low final mTCP			16.4149	7
333	M	76.5661	Mesothelioma		Histology	PASS	54		YES		5.49207	10
334	F	56.5354	Breast (TNBC)		Histology	PASS	16		YES		5.4732	9
335	M	73.4996	Mesothelioma		Histology	PASS	23		YES		11.4262	5
336	F	62.5917	Lung (NSCLC)		Histology	PASS	34		YES		3.4322	9
337	F	45.2579	Breast (ER positive, Her2 negative)		Histology	PASS	36		YES		9.40896	11
338	M	59.1721	Lung (NSCLC)		Histology	PASS	33		YES		8.42521	5
339	M	30.3526	Lung (NSCLC)		Histology	PASS	15		YES		-22.2956	8
340	M	49.9863	Lung (NSCLC)		Histology	PASS	54		YES		5.38202	6
341	M	59.1611	Bladder (UCC)		Histology	PASS	53		YES		1.41135	5
342	F	63.9935	Ovary (Extraovarial carcinoma)		Histology	PASS	18		YES		3.60996	6
343	M	58.4958	Colorectum (Colon; adenocarcinoma)		Histology	FAIL	8	Low final mTCP			-5.45637
344	F	51.7413	Mesothelioma		Histology	PASS	82		YES		7.43371	8
345	F	76.2184	Lung (NSCLC)		Histology	PASS	26		YES		14.3976	6
346	M	69.5926	Mesothelioma		Histology	No WGS		No tumour/no malignancy
347	F	48.6885	Breast (TNBC)		Histology	PASS	88		YES		3.41878	5
348	F	41.8163	Oesophagus/Stomach (Stomach)		Histology	No WGS		Incorrect request
349	F	48.9897	Oesophagus/Stomach (Stomach; mixed type)		Histology	PASS	27		YES		282.422	6
350	F	48.182	Oesophagus/Stomach (Stomach; mixed type carcinoma)		Histology	FAIL (Second WGS)		Low pTCP			-5.66302
351	M	82.1706	Lung (NSCLC)		Histology	PASS	55		YES		0.490678	6
352	M	55.0652	Prostate		Histology	FAIL	14	Low final mTCP			162.476	4
353	M	55.0652	Prostate (Adenocarcinoma)		Histology	No WGS		No tumour/no malignancy
354	F	50.9966	Soft tissue (Leiomyosarcoma)		Histology	PASS	87		YES		-1099.36	7
355	F	59.7443	Lung (NSCLC)		Histology	PASS	15		YES		10.4003	7
356	M	39.845	Oesophagus/Stomach (GEJ)		Histology	PASS	15		YES		9.68946	8
357	F	70.748	CUP		Histology	PASS	50		YES		23.7046	5
358	F	61.554	Oesophagus/Stomach (Oesophagus; adenocarcinoma)		Histology	No WGS		Cancelled
359	M	70.926	Oesophagus/Stomach (Oesophagus)		Histology	PASS	79		YES		0.58765	6
360	M	76.6291	Head and neck (SCC)		Histology	FAIL	12	Low final mTCP			6.40365	6
361	F	72.4373	Lung (NSCLC)		Histology	PASS	42		YES		0.685777	7
362	M	65.075	Lung (NSCLC)		Cytology	No WGS		Biopsy failure
363	M	64.7109	Lung (NSCLC)		Histology	PASS	45		YES		2.45867	7
364	M	71.9664	Lung (NSCLC)		Histology	PASS	20		YES		10.455	4
365	M	68.5823	Mesothelioma		Histology	No WGS		No tumour/no malignancy
366	M	74.8275	Lung (NSCLC)		Cytology	FAIL		Low pTCP			0.475681
367	M	63.5746	Mesothelioma		Histology	No WGS		Incorrect request
368	F	62.2741	Lung (Carcinoid; atypical carcinoid)		Histology	PASS	90		YES		8.48893	4
369	M	78.8304	Mesothelioma		Histology	PASS	71		YES		10.4709	5
370	F	82.7565	Melanoma		Histology	No WGS		Missing blood sample
371	F	42.7856	Breast (ER positive, Her2 negative)		Histology	PASS	79		YES		14.5073	6
372	F	56.7901	Uterus/Endometrium		Histology	PASS	61		YES		7.52128	6
373	F	65.6199	Oesophagus/Stomach (Oesophagus)		Histology	PASS	51		YES		6.42594	6
374	F	64.5137	Breast (TNBC)		Histology	PASS	89		YES		14.4146	7
375	F	39.292	CUP		Histology	FAIL	12	Low final mTCP			2.37508	7
376	M	62.8162	Colorectum (Colorectum; Sigmoid)		Histology	PASS	74		YES		-154.57	7
377	F	69.2339	Lung (SCLC)		Histology	PASS	85		YES		6.40149	7
378	F	41.1127	Breast (TNBC)		Histology	PASS	44		YES		-80.3063	7
379	F	29.8598	Cervix		Histology	PASS	26		YES		10.6512	4
380	F	47.7905	Breast (ER positive, Her2 negative)		Histology	PASS	75		YES		11.4964	7
381	F	56.9735	CUP		Histology	PASS	20		YES		298.476	6
382	F	59.6786	Colorectum (Sigmoid)		Histology	No WGS		No tumour/no malignancy
383	F	56.0672	Oesophagus/Stomach (Stomach; adenocarcinoma)		Histology	FAIL (Second WGS)	12	Low final mTCP			15.5708	5
384	M	69.0122	Lung (NSCLC)		Histology	PASS	29		YES		-7.55211	5
385	M	73.7241	Small intestine (Duodenum)		Histology	PASS	36		YES		8.52477	6
386	M	54.4847	Soft tissue (Epithelioid sarcoma)		Histology	PASS	41		YES		-4.36342	6
387	F	65.3543	Lung (NSCLC)		Histology	No WGS		No tumour/no malignancy
388	F	41.0716	Cervix		Histology	PASS	78		YES		1.40994	6
389	M	61.8361	Prostate		Histology	PASS	52		YES		12.3908	5
390	F	53.0254	Breast (TNBC)		Histology	No WGS		No tumour/no malignancy
391	M	61.7676	Prostate		Histology	No WGS		Biopsy failure
392	M	51.3827	Lung (NSCLC)		Histology	PASS	81		YES		5.45644	6
393	M	55.0022	Lung (NSCLC)		Histology	PASS	27		YES		-43.6133	7
394	F	69.3298	Uterus/Endometrium (High grade serous carcinoma)		Histology	No WGS		No tumour/no malignancy
395	F	81.8202	CUP		Histology	PASS	81		YES		-4.37082	6
396	M	65.7321	Urothelial tract (Urethra)		Histology	PASS	27		YES		1.73243	7
397	M	69.2257	CUP		Histology	PASS	32		YES		9.57561	6
398	F	64.5904	Uterus/Endometrium		Histology	PASS	79		YES		-1012.56	7
399	M	60.3904	Mesothelioma		Histology	PASS	41		YES		42.4654	6
400	F	65.3735	Breast (ER positive, Her2 negative)		Histology	No WGS		No tumour/no malignancy
401	F	72.3114	Lung (NSCLC)		No sample	No WGS		Cancelled
402	F	65.3735	Breast (ER positive, Her2 negative)		Histology	No WGS		Cancelled
403	F	64.5137	Uterus/Endometrium		Histology	FAIL (Second WGS)	10	Low final mTCP			10.4173
404	M	51.9001	Colorectum (Colorectum; Sigmoid)		Histology	PASS	59		YES		-196.336	9
405	F	61.0612	Lung (NSCLC)		Histology	PASS	32		YES		0.378185	5
406	F	73.8364	Lung (Carcinoid; atypical carcinoid)		Histology	PASS	42		YES		7.65928	6
407	F	47.4975	Breast (TNBC)		Histology	PASS	50		YES		0.518816	6
408	F	50.3943	Breast (TNBC)		Histology	PASS	68		YES		0.616354	6
409	F	57.5731	Breast (ER positive, Her2 negative)		Histology	PASS	41		YES		2.37961	5
410	F	54.9146	Lung (Carcinoid; atypical carcinoid)		Histology	PASS	80		YES		7.48709	5
411	F	65.0668	Uterus/Endometrium		Histology	PASS	75		YES		0.683168	3
412	F	70.2196	Lung (NSCLC)		Histology	PASS	73		YES		14.545	7
413	F	41.1866	Ovary (Low grade serous carcinoma)		Histology	PASS	36		YES		8.40601	9
414	F	62.9011	Lung (NSCLC)		Histology	FAIL	11	Low final mTCP			6.52583	5
415	M	77.3929	Urothelial tract		Histology	PASS	52		YES		7.51044	6
416	F	54.2931	Lung (NSCLC)		Histology	No WGS		Cancelled
417	F	54.2931	Lung (NSCLC)		Cytology	No WGS		Incorrect request
418	F	71.1012	Lung (NSCLC)		Histology	PASS	18		YES		10.7094	6
419	M	74.9836	Mesothelioma		Histology	No WGS		No tumour/no malignancy
420	M	64.7793	CUP		Histology	PASS	38		YES		7.3927	6
421	M	73.4969	Prostate		Histology	PASS	43		YES		16.4815	10
422	F	61.283	Soft tissue (Myxoid liposarcoma)		Histology	PASS	85		YES		-72.344	7
423	M	54.6599	Colorectum (Colon)		Histology	PASS	51		YES		-13.4309	4
424	M	38.9798	Oesophagus/Stomach (Stomach)		Histology	PASS	15		YES		0.648658	9
425	M	51.9521	Lung (NSCLC)		Histology	PASS	21		YES		11.3861	4
426	M	63.5281	Lung (NSCLC)		Histology	FAIL	11	Low final mTCP			36.6595	8
427	F	37.9942	Soft tissue (Leiomyosarcoma)		Histology	PASS	84		YES		3.39108	7
428	M	83.4	Mesothelioma		Histology	PASS	23		YES		10.5231	7
429	F	50.397	Colorectum (Sigmoid; adenocarcinoma)		Histology	No WGS		Cancelled
430	M	43.7247	Oesophagus/Stomach (GEJ; signet ring)		Histology	PASS	34		YES		7.37295	6
431	F	45.5235	Breast (ER positive, Her2 positive)		Histology	PASS	69		YES		9	6
432	F	71.8404	CUP		Histology	No WGS		No tumour/no malignancy
433	F	77.5162	Pancreas		Histology	PASS	64		YES		-16.5731	7
434	F	49.8083	Breast (TNBC)		Histology	PASS	84		YES		20.3802	5
435	F	49.7289	Breast (TNBC)		Histology	No WGS		Biopsy failure
436	F	66.4221	Lung (NSCLC)		Histology	PASS	30		YES		3.6608	8
437	F	56.9187	Ovary		Histology	PASS	77		YES		6.67827	3
438	M	60.0674	Brain/central nervous system (Glioblastoma Multiforme)		Histology	PASS	49		YES		0.456265	6
439	F	59.9222	Lung (NSCLC)		Histology	PASS	23		YES		3.50634	4
440	M	58.5396	Pancreas (Neuro-endocrine; NEC)		Histology	PASS	88		YES		9.47509	6
441	M	82.5841	Head and neck (Oropharynx)		Histology	PASS	79		YES		1.39454	6
442	M	87.0879	CUP		Histology	PASS	16		YES		3.41093	8
443	F	75.3997	Lung (NSCLC)		Histology	PASS	35		YES		6.39697	7
444	M	56.7873	CUP		Histology	PASS	29		YES		14.5335	6
445	F	76.0322	Lung (NSCLC)		Histology	PASS	24		YES		14.4783	5
446	F	67.1942	CUP		Histology	PASS	83		YES		-1	7
447	F	61.1434	Lung (NSCLC)		Histology	PASS	29		YES		17.5615	9
448	M	80.1747	Mesothelioma		Histology	PASS	89		YES		10.3958	7
449	F	59.9003	Lung (NSCLC)		Histology	PASS	60		YES		11.4112
450	F	70.4003	Soft tissue (Angiosarcoma)		Histology	PASS	57		YES		-30.3747	7
451	F	59.8428	Lung (NSCLC)		Cytology	PASS (Second WGS)	16		YES		185.399	6
452	M	80.1172	Mesothelioma		Histology	PASS (Second WGS)	62		YES		64.4417	8
453	F	25.0712	Soft tissue (Rhabdomyosarcoma)		Histology	PASS	93		YES		1.38204	5
454	F	59.684	Breast (ER positive, Her2 negative)		Histology	PASS	78		YES		8.45694	20
455	M	50.5887	Colorectum (Colon)		Histology	PASS	75		YES		13.465
456	M	77.0863	Prostate		Histology	PASS	64		YES		10.4994	6
457	M	23.5215	CUP		Histology	No WGS		Cancelled
458	M	76.7824	Sarcoma (Small blue round cell tumour)		Histology	PASS	90		YES		-74.3424	6
459	M	70.173	Prostate		Histology	PASS	26		YES		9.44586	12
460	F	34.8237	Breast (ER positive, Her2 negative)		Histology	PASS	84		YES		16.4308	5
461	M	80.0925	CUP		Histology	FAIL	12	Low final mTCP			9.54101	4
462	M	54.4601	Oesophagus/Stomach (Stomach; signet ring)		Histology	FAIL	10	Low final mTCP			-7.61388	6
463	F	22.336	Soft tissue (Rhabdomyosarcoma)		Histology	PASS	76		YES		-16.5064	9
464	M	53.1678	Brain/central nervous system (Glioblastoma Multiforme)		Histology	PASS	37		YES		-1	9
465	M	63.6924	Soft tissue (Angiosarcoma)		Histology	PASS	73		YES		13.6572	6
466	F	53.3047	Lung (NSCLC)		Histology	PASS	26		YES		1.49119	7
467	M	67.5966	Mesothelioma		Histology	PASS	42		YES		11.3926	3
468	F	32.6142	Breast (ER positive, Her2 negative)		No sample	No WGS		Cancelled
469	M	74.1293	Urothelial tract (UCC)		Histology	PASS	20		YES		6.51979	11
470	F	41.7315	Breast (ER positive, Her2 positive)		Histology	No WGS		Incorrect request
471	F	53.688	Ovary		Histology	PASS	81		YES		5.48132	8
472	F	65.0476	Pancreas		Histology	PASS	35		YES		11.3957	5
473	F	50.6379	Lung (NSCLC)		Cytology	PASS	51		YES		1.42846
474	F	29.2	Uterus/Endometrium		Histology	PASS	75		YES		28.4646	3
475	F	29.0576	Uterus/Endometrium		Histology	No WGS		No tumour/no malignancy
476	F	67.3311	Lung (NSCLC)		Cytology	PASS	24		YES		0.674943	7
477	M	67.9279	Soft tissue (Liposarcoma)		Histology	PASS	100		YES		-2633	3
478	M	67.8869	Soft tissue (Liposarcoma)		Histology	No WGS		Incorrect request
479	F	40.6472	Cervix		Histology	FAIL		Low DNA quantity			2.50274	6
480	F	32.7784	Cervix (SCC)		Histology	PASS	66		YES		6.40508	7
481	M	61.9812	Oesophagus/Stomach (GEJ)		Histology	PASS	62		YES		20.6591	6
482	F	72.106	Lung (NSCLC)		Histology	No WGS		No tumour/no malignancy
483	F	72.106	Lung (NSCLC)		Cytology	FAIL		Low pTCP			39.4884
484	F	56.9489	Breast (ER positive, Her2 negative)		Histology	PASS	79		YES		2.50052	6
485	M	71.3367	Soft tissue (Leiomyosarcoma)		Histology	PASS	88		YES		-1139.5	10
486	F	74.9398	Ovary		Histology	PASS	92		YES		-11.5561	6
487	M	76.9932	CUP		Histology	PASS	20		YES		6.42184	7
488	F	54.4628	CUP		Histology	PASS	35		YES		7.5952	11
489	F	75.1971	Colorectum (Colon)		Histology	PASS	31		YES		4.45102	5
490	M	59.2569	Lung (NSCLC)		Histology	PASS	15		YES		8.40016	3
491	M	71.3613	Lung (Carcinoid; atypical carcinoid)		Histology	PASS	24		YES		8.43548	6
492	M	74.5565	Mesothelioma		Histology	No WGS		Incorrect request
493	M	56.3273	Lung (NSCLC)		Histology	No WGS		Cancelled
494	M	69.609	Soft tissue (Liposarcoma)		Histology	PASS	72		YES		-17.3551	6
495	F	33.8353	CUP		Histology	PASS	47		YES		3.61227
496	F	36.0503	Colorectum (Colon)		Histology	PASS	72		YES		-5.37339	5
497	M	75.3012	Prostate		Histology	PASS	75		YES		3.43029	5
498	F	60.3329	Breast (ER positive, Her2 negative)		Histology	PASS	77		YES		10.7403	6
499	F	72.0759	Lung (NSCLC)		Histology	PASS	55		YES		51.4034	9
500	F	63.4761	CUP		Histology	PASS	33		YES		-4.47983	7
501	M	61.5349	Lung (NSCLC)		Histology	PASS	43		YES		8.44557	6
502	M	69.0067	Lung (NSCLC)		Histology	PASS	22		YES		29.4313	4
503	M	52.9268	Soft tissue (Myxoid liposarcoma)		Histology	PASS	77		YES		366.646	9
504	M	68.9026	Lung (NSCLC)		Histology	No WGS		No tumour/no malignancy
505	M	51.8919	Soft tissue (Myxoid liposarcoma)		Histology	FAIL (Second WGS)		Low DNA quantity			-314.596
506	F	50.8542	Ovary (High grade serous carcinoma)		No sample	No WGS		Cancelled
507	M	80.1117	Skin (SCC)		Histology	PASS	26		YES		1.45989	3
508	F	46.4544	Ovary (Low grade serous carcinoma)		Histology	PASS	24		YES		5.68631	8
509	M	82.9728	CUP		Histology	PASS	16		YES		0.623862	6
510	F	67.06	Soft tissue (Leiomyosarcoma)		Histology	PASS	95		YES		19.581	7
511	M	76.8892	Penis		Histology	PASS	22		YES		20.3908	11
512	F	80.8427	CUP		Histology	No WGS		Cancelled
513	M	45.4468	CUP		Histology	PASS	32		YES		5.49379	3
514	M	81.2835	Urothelial tract (UCC)		Histology	PASS	43		YES		55.5866	10
515	M	31.8667	Soft tissue (Synoviosarcoma)		Histology	PASS	83		YES		2.53534	5
516	M	67.8294	Soft tissue (Liposarcoma)		Histology	PASS	19		YES		-4.45379	10
517	M	71.7692	Lung (NSCLC)		Histology	PASS	35		YES		10.4106	5
518	M	79.6216	Uterus/Endometium (Carcinosarcoma)		Histology	No WGS		Cancelled
519	M	57.2582	Soft tissue (Liposarcoma)		Histology	PASS	90		YES		0.466912	7
520	M	46.8322	CUP		Histology	PASS	29		YES		-10.5892	9
521	M	74.1814	Prostate		Histology	FAIL	12	Low final mTCP			28.4959	11
522	F	54.9502	Lung (NSCLC)		Histology	PASS	30		YES		0.504431	8
523	F	24.6605	Lung (NSCLC)		Cytology	PASS	84		YES		0.67516	7
524	F	40.6664	Breast (ER positive, Her2 negative)		Histology	PASS	61		YES		7.43173	6
525	M	55.7633	Prostate		Histology	PASS	61		YES		13.4505	7
526	M	73.9103	CUP		Histology	PASS	23		YES		12.4962	6
527	F	69.9732	Lung (NSCLC)		Histology	PASS	22		YES		15.3776	7
528	F	70.2798	Bladder (UCC)		Histology	PASS	38		YES		13.6431	10
529	M	53.907	CUP		Histology	PASS	39		YES		-6.61014	5
530	M	73.7652	Mesothelioma		Histology	PASS	23		YES		-16.4691	5
531	F	66.9642	CUP		Cytology	PASS	17		YES		0.597653	7
532	F	75.1369	Lung (NSCLC)		Histology	PASS	66		YES		8.47939	7
533	M	76.5688	Soft tissue (Sarcoma NOS)		Histology	PASS	35		YES		-13.5053	7
534	F	61.2748	Uterus/Endometrium		Histology	PASS	48		YES		9.42251	9
535	M	69.442	Prostate		Histology	PASS	84		YES		23.6004	6
536	M	27.8502	Testis (Non-seminoma)		Histology	PASS	97		YES		-348.32
537	M	27.2314	Testis (Mixed teratoma/seminoma)		Histology	No WGS		Biopsy failure
538	M	31.7024	Colorectum (Colorectum; Sigmoid)		Histology	PASS	32		YES		-14.4993	7
539	M	71.7063	Lung (NSCLC)		Histology	PASS	18		YES		25.3967	6
540	M	71.8131	CUP		Histology	PASS	54		YES		67.5189	6
541	F	81.4177	Lung (NSCLC)		Cytology	No WGS		No tumour/no malignancy
542	F	59.8894	CUP		Histology	PASS	62		YES		1.59648	10
543	F	72.7905	CUP		Histology	PASS	90		YES		12.4214	8
544	F	66.8465	Lung (NSCLC)		Histology	PASS	55		YES		21.6117
545	F	66.7561	Lung (NSCLC)		Cytology	PASS (Second WGS)	58		YES		126.615	7
546	M	71.3312	Bladder (UCC)		Histology	PASS	25		YES		13.3824	11
547	F	54.9639	Colorectum (Rectum)		Histology	PASS	51		YES		12.4185	7
548	M	74.028	Lung (NSCLC)		Cytology	PASS	23		YES		0.715465	10
549	F	29.7667	Cervix		Histology	PASS	37		YES		0.677722	11
550	F	54.0795	Oesophagus/Stomach (Stomach)		Histology	PASS	21		YES		-571.377	8
551	F	59.6895	CUP		Histology	PASS	55		YES		8.47147	11
552	F	52.1575	CUP		Histology	PASS	19		YES		10.415	7
553	M	48.82	Soft tissue (Fibromyxoid sarcoma)		Histology	PASS	81		YES		22.5081	6
554	F	52.56	Breast (TNBC)		Histology	PASS	95		YES		15.6677	9
555	F	82.0556	Lung (NSCLC)		Cytology	No WGS		Biopsy failure
556	M	59.9222	Lung (NSCLC)		Histology	PASS	42		YES		14.5954	7
557	F	56.2781	Brain/central nervous system (Glioblastoma Multiforme)		Histology	PASS	22		YES		-34.4495	7
558	M	67.7719	Lung (NSCLC)		Histology	PASS	38		YES		14.6331	9
559	F	64.3029	CUP		Histology	PASS	39		YES		13.4259	7
560	F	40.9183	Breast (ER positive, Her2 positive)		No sample	No WGS		Cancelled
561	F	53.5922	Melanoma		Histology	No WGS		Cancelled
562	F	51.295	Colorectum (Colorectum; Sigmoid)		Histology	PASS	73		YES		3.49484	6
563	F	64.7081	Lung (NSCLC)		Histology	No WGS		No tumour/no malignancy
564	M	49.0718	Lung (NSCLC)		Cytology	FAIL		Low pTCP			0.707394
565	M	62.2495	Soft tissue (Liposarcoma)		Histology	PASS	59		YES		14.3909	7
566	F	67.279	Breast (ER positive, Her2 negative)		Histology	PASS	76		YES		-158.484	9
567	F	52.1274	Breast (ER positive, Her2 positive)		Histology	PASS	64		YES		9.38661	8
568	F	67.0354	Breast (ER positive, Her2 negative)		Histology	FAIL		Low pTCP			27
569	M	75.6544	Head and neck (Lip; adenoid cystic carcinoma)		Histology	No WGS		Cancelled
570	M	75.6544	Mesothelioma		Histology	PASS	26		YES		62.4601	3
571	F	67.5118	Bladder (UCC)		Histology	PASS	61		YES		-8.52839	5
572	F	52.6147	Breast (ER positive, Her2 negative)		Histology	PASS	72		YES		11.406	7
573	M	82.7292	Urothelial tract (UCC)		Histology	PASS	48		YES		25.4918	6
574	F	70.1648	Uterus/Endometrium		Histology	PASS	15		YES		28.4843	7
575	F	56.8092	Soft tissue (Leiomyosarcoma)		Histology	PASS	90		YES		109.398	6
576	F	71.4653	Benign tumour (No cancer)		Histology	No WGS		No tumour/no malignancy
577	F	70.069	Uterus/Endometrium		Histology	No WGS		No tumour/no malignancy
578	F	70.069	Uterus/Endometrium		Histology	FAIL (Second WGS)		Low pTCP			-197.463
579	M	47.4702	Mesothelioma		No sample	No WGS		Cancelled
580	F	44.6939	Breast (TNBC)		Histology	PASS	55		YES		-11.3973	8
581	F	33.1864	Ovary (Granulosa cell carcinoma)		Histology	PASS	82		YES		-17.5554	8
582	F	66.1647	Lung (NSCLC)		Histology	PASS	40		YES		15.424	7
583	F	73.7542	Lung (NSCLC)		Histology	PASS	37		YES		15.4599	6
584	M	59.6895	CUP		Histology	PASS	76		YES		-7.60105	7
585	F	55.3198	Lung (NSCLC)		Histology	PASS	18		YES		14.3897	13
586	M	84.2816	Head and neck (Oropharynx; BCC)		Histology	PASS	47		YES		-76.3599	5
587	F	63.7006	Breast (ER positive, Her2 positive)		Histology	No WGS		Incorrect request
588	F	55.9796	Breast (TNBC)		Histology	No WGS		Incorrect request
589	M	58.1645	CUP		Histology	PASS	58		YES		-8.52593	5
590	M	47.5057	Lung (NSCLC)		Histology	PASS	30		YES		19.4002	7
591	M	71.4544	Lung (NSCLC)		Histology	PASS	44		YES		-30.6071	5
592	M	59.3664	Colorectum (Rectum)		Histology	PASS	59		YES		20.6483	10
593	M	53.5292	CUP		Histology	FAIL	12	Low final mTCP			12.3857	4
594	M	75.4216	Head and neck (Nasopharynx; SCC)		Histology	PASS	15		YES		0.486606	6
595	M	67.5583	CUP		Histology	PASS	46		YES		1.38582	7
596	M	63.5774	Prostate		Histology	PASS	63		YES		23.4222	8
597	M	66.6439	Lung (NSCLC)		Histology	PASS	24		YES		2.60398	10
598	M	75.4107	Prostate		Histology	PASS	21		YES		23.6048	4
599	M	66.099	Prostate		Histology	PASS	61		YES		0.723256	3
600	F	71.6296	Breast (TNBC)		Histology	PASS	45		YES		16.4908	4
601	F	53.51	Cervix		Histology	PASS	17		YES		0.644827	5
602	M	41.1072	Soft tissue (Epithelioid haemangioendothelioma)		Histology	PASS	43		YES		14.4331	9
603	M	68.9738	Anus (SCC)		Histology	PASS	85		YES		20.5142	7
604	M	66.4139	Prostate		Histology	PASS	54		YES		85.3879	7
605	M	49.4743	Colorectum (Caecum)		Histology	PASS	33		YES		0.440983	7
606	M	69.4502	Urothelial tract (UCC)		Histology	PASS	42		YES		20.6908	8
607	F	73.5982	Lung (Carcinoid; atypical carcinoid)		Histology	FAIL		Low pTCP			14.5183
608	F	70.5481	Lung (NSCLC)		Histology	PASS	45		YES		15.4872	7
609	M	69.2421	Mesothelioma		Histology	PASS	24		YES		9.4846	9
610	M	38.7389	Oesophagus/Stomach (GEJ; intestinal type carcinoma)		Histology	PASS	19		YES		-18.4475	5
611	F	63.6184	Soft tissue (Leiomyosarcoma)		Histology	PASS	45		YES		-1	8
612	F	59.4991	Breast (TNBC)		Histology	PASS	66		YES		-365.56	3
613	F	68.1059	Breast (ER positive, Her2 negative)		Histology	PASS	76		YES		6.5624	9
614	F	68.7	Ovary (High grade serous carcinoma)		Histology	FAIL		Low DNA quantity			7.39263
615	M	38.2406	CUP		Histology	PASS	47		YES		2.69677	9
616	F	37.6383	Breast (ER positive, Her2 negative)		Histology	PASS	38		YES		8.49985	8
617	F	54.2246	Breast (ER positive, Her2 negative)		Histology	PASS	29		YES		10.424	3
618	F	34.5362	Cervix		Histology	PASS	35		YES		0.69408	8
619	F	60.311	Breast (ER positive, Her2 negative)		Histology	PASS	52		YES		7.61553	7
620	F	59.3692	Soft tissue (Leiomyosarcoma)		Histology	PASS	74		YES		0.668716	6
621	F	71.4544	Soft tissue (Leiomyosarcoma)		Histology	PASS	50		YES		-36.327	7
622	F	53.7017	Breast (ER positive, Her2 negative)		Histology	No WGS		No tumour/no malignancy
623	F	51.6783	Ovary (Borderline/low grade serous carcinoma)		Histology	PASS	74		YES		0.688102	3
624	M	72.0622	Lung (Carcinoid; atypical carcinoid)		Histology	PASS	88		YES		8.53628	6
625	M	73.2505	CUP		Histology	PASS	64		YES		3.70351	3
626	M	69.5488	CUP		Histology	PASS	85		YES		3.55443	6
627	F	66.1702	Bone (Osteosarcoma)		Histology	PASS	82		YES		-132.486	5
628	M	48.4175	Soft tissue (High grade spindle cell/pleomorphic sarcoma)		Histology	PASS	65		YES		2.37226	5
629	F	68.2236	Oesophagus and Stomach		Histology	FAIL	14	Low final mTCP			-175.52	6
630	M	74.1677	Head and neck (Pharynx; SCC)		Histology	PASS	65		YES		0.550986	6
631	F	73.4449	Mesothelioma		Histology	PASS	24		YES		14.4783	7
632	F	57.4335	Breast (ER positive, Her2 negative)		Histology	PASS	67		YES		19.5225	8
633	F	61.1543	Breast (ER positive, Her2 negative)		Histology	PASS	37		YES		20.4523	3
634	M	61.2529	CUP		Histology	PASS	64		YES		7.4783	11
635	M	53.291	Lung (NSCLC)		Histology	No WGS		No tumour/no malignancy
636	M	82.4691	Pancreas		Histology	FAIL	10	Low final mTCP			9.51091	7
637	F	52.7133	Lung (NSCLC)		Histology	PASS	22		YES		-69.5358	5
638	M	55.0761	Oesophagus/Stomach (Oesophagus)		Histology	PASS	58		YES		2.44658	10
639	F	59.6868	Cervix (SCC)		Histology	PASS	54		YES		2.40678	8
640	F	38.6787	Ovary		Histology	PASS	27		YES		7.7034	10
641	F	39.333	Breast (ER positive, Her2 negative)		Histology	PASS	17		YES		-8.56859	7
642	F	41.8246	Breast (ER positive, Her2 negative)		Histology	PASS	81		YES		-1407.47	9
643	F	50.909	CUP		Histology	PASS	59		YES		6.68539	6
644	M	47.3415	CUP		Histology	No WGS		Cancelled
645	M	77.8858	Kidney (Chromophobic RCC)		Histology	PASS	33		YES		10.5231	11
646	M	67.9772	Prostate (Sarcomatoid carcinoma)		Histology	PASS	21		YES		0.585706	9
647	F	58.7203	Ovary (High grade serous carcinoma)		Histology	PASS	49		YES		9.39363	8
648	F	60.2179	Soft tissue (Spindle cell sarcoma)		Histology	PASS	76		YES		14.42	9
649	F	51.2704	Breast (ER positive, Her2 positive)		Histology	PASS	90		YES		16.6335	7
650	F	64.7246	Pancreas (Neuro-endocrine; NEC)		Histology	PASS	20		YES		7.51282	7
651	F	69.0833	Breast (ER positive, Her2 negative)		Histology	PASS	51		YES		12.497	3
652	F	69.0669	Breast (Acinic cell TNBC)		Histology	PASS	86		YES		7.5213	7
653	M	76.0185	CUP		Histology	PASS	45		YES		6.38579	8
654	F	61.8059	Lung (SCLC)		Histology	PASS	29		YES		-7.52901	6
655	M	50.8323	Lung (NSCLC)		Histology	FAIL	12	Low final mTCP			9.40173	5
656	F	57.1925	Lung (NSCLC)		Histology	PASS	43		YES		0.639508	3
657	F	49.3621	Breast (TNBC)		Histology	PASS	98		YES		-134.555	7
658	F	41.3892	Soft tissue (Desmoplastic small round cell tumour)		Histology	PASS	99		YES		1.64041	7
659	F	43.6069	CUP		Histology	PASS	65		YES		3.73068	7
660	F	54.8242	Soft tissue (Leiomyosarcoma)		Histology	PASS	66		YES		-20.5118	7
661	M	70.3373	Soft tissue (Liposarcoma; dedifferentiated)		Histology	PASS	93		YES		9.50514	6
662	M	74.989	CUP		Histology	PASS	79		YES		-110.356	6
663	F	66.329	Soft tissue (Angiosarcoma)		Histology	PASS	72		YES		-42.5131	7
664	F	55.4731	Soft tissue (Liposarcoma)		Histology	PASS	62		YES		8.42427	6
665	F	44.6528	Ovary (High grade papillary serous carcinoma)		Histology	PASS	69		YES		16.4824	3
666	F	46.4982	Mesothelioma		Histology	PASS	51		YES		-8.35315	6
667	F	64.2044	Bladder (UCC)		Histology	No WGS		No tumour/no malignancy
668	M	70.0334	Urothelial tract (UCC)		Histology	FAIL	14	Low final mTCP			-77.4833	6
669	F	66.4768	Urothelial tract (UCC)		Histology	PASS	41		YES		8.43482	4
670	F	44.9157	Lung (NSCLC)		Histology	PASS	52		YES		8.49843	4
671	F	61.5239	Breast (ER negative, Her2 positive)		Histology	PASS	43		YES		19.5009	11
672	F	35.6095	Breast (TNBC)		Histology	PASS	52		YES		-152.57	7
673	F	62.7615	CUP		Histology	PASS	15		YES		6.67626	6
674	M	46.0245	Penis		Histology	PASS	57		YES		13.6061	4
675	F	63.435	Uterus/Endometrium		Histology	No WGS		Cancelled
676	M	71.0108	Lung (NSCLC)		Histology	PASS	31		YES		8.38643	4
677	M	33.1015	Kidney (RCC)		Histology	PASS	18		YES		9.38209	3
678	F	45.8794	Colorectum (Appendix)		Histology	PASS	74		YES		-297.444	8
679	F	70.967	Breast (TNBC)		Histology	PASS	74		YES		-60.4038	6
680	M	55.0186	Prostate (Neuro-endocrine; NEC)		Histology	PASS	81		YES		8.51084	6
681	M	52.8557	Oesophagus/Stomach (Oesophagus)		Histology	PASS	34		YES		-116.439	6
682	M	75.9446	Skin adnex (SCC)		Histology	PASS	40		YES		-37.5614	7
683	F	35.1687	Cervix		Histology	PASS	27		YES		3.50776	5
684	F	52.6503	Teratoma (Immature extraovary teratoma)		Histology	PASS	73		YES		-671.466	5
685	F	68.9081	Breast (ER positive, Her2 negative)		Histology	PASS	85		YES		16.6493	10
686	M	75.0684	Skin (SCC)		Histology	No WGS		No tumour/no malignancy
687	M	96.3011	Skin (SCC)		Cytology	No WGS		Incorrect request
688	F	74.0198	Lung (NSCLC)		Histology	PASS	51		YES		14.3983	5
689	F	64.5603	Colorectum (Sigmoid)		Histology	No WGS		Cancelled
690	M	51.6345	Soft tissue (Spindle cell sarcoma)		Histology	PASS	78		YES		-13.3757	6
691	F	74.0582	Breast (ER positive, Her2 negative)		Histology	No WGS		No tumour/no malignancy
692	F	69.9102	CUP		Histology	PASS	95		YES		-17.3462	3
693	F	49.0417	Breast (TNBC)		Histology	PASS	52		YES		11.6754	5
694	F	66.7369	Breast (TNBC)		Histology	PASS	45		YES		14.4311	7
695	M	69.6775	Salivary gland		Cytology	No WGS		Cancelled
696	M	61.9018	CUP		Histology	PASS	78		YES		6.37508	12
697	M	34.235	Soft tissue (Angiosarcoma)		Histology	No WGS		Missing blood sample
698	M	46.6707	Colorectum (Caecum; signet ring)		Histology	PASS	15		YES		0.420885	3
699	M	64.73	Melanoma		Histology	PASS	75		YES		12.4003
700	F	51.9385	Ovary (High grade clear cell carcinoma)		Histology	PASS	41		YES		18.5147	5
701	M	64.3604	CUP		Histology	PASS	75		YES		15.4272	9
702	F	78.0993	CUP		No sample	No WGS		Cancelled
703	M	27.8912	Lung (NSCLC)		Histology	PASS	58		YES		3.42766	5
704	M	68.6343	Mesothelioma		Histology	PASS	58		YES		23.4704	5
705	M	71.6926	Liver (Atypical HCC)		Histology	PASS	25		YES		29.4258	6
706	M	27.8365	Lung (LCNEC)		Histology	No WGS		Cancelled
707	F	63.2981	CUP		Histology	PASS	32		YES		9.50957	5
708	F	37.3152	Breast (TNBC)		Histology	No WGS		Incorrect request
709	F	37.3152	Cervix		Histology	No WGS		Cancelled
710	F	45.7699	Oesophagus/Stomach (Stomach)		Histology	PASS	17		YES		14.683	7
711	F	74.8001	Lung (NSCLC)		Histology	PASS	52		YES		14.4929	5
712	M	64.344	CUP		Histology	PASS	19		YES		34.6162	7
713	M	56.3876	Soft tissue (Spindle cell sarcoma)		Histology	PASS	61		YES		-20.3455	5
714	M	62.8299	Lung (NSCLC)		Histology	PASS	36		YES		4.40377	4
715	M	67.0874	CUP		Histology	PASS	66		YES		9.43524	5
716	M	62.1317	Prostate		Histology	PASS	63		YES		17.4397	6
717	F	49.9398	Ovary (Serous/papillary borderline carcinoma)		Histology	PASS	81		YES		6.41736	8
718	M	51.2759	Lung (Carcinoid; atypical carcinoid)		Histology	PASS	90		YES		8.65661	5
719	F	69.0505	Ovary (High grade serous carcinoma)		Histology	No WGS		Incorrect request
720	F	80.4759	Melanoma		Histology	No WGS		Cancelled
721	F	65.8143	Breast (ER positive, Her2 negative)		Histology	PASS	88		YES		29.3983	8
722	F	66.0497	Lung (NSCLC)		Cytology	PASS	15		YES		0.542862	9
723	F	34.7936	Breast (TNBC)		Histology	PASS	36		YES		7.40141	4
724	F	69.7377	Lung (LCNEC)		Histology	PASS	69		YES		2.4792	7
725	F	56.6532	Lung (Carcinoid; atypical carcinoid)		Histology	PASS	91		YES		15.4289	6
726	M	68.8917	Prostate		Histology	PASS	38		YES		15.507	5
727	M	70.7097	Lung (Carcinoid; atypical carcinoid)		Histology	PASS	62		YES		22.487	4
728	F	46.0957	Colorectum (Colon)		Histology	PASS	51		YES		-5.62038	8
729	F	73.1519	CUP		Histology	PASS	48		YES		15.4834	7
730	F	80.0871	Lung (NSCLC)		Histology	PASS	21		YES		14.4662	8
731	M	69.954	Colorectum (Colon)		Histology	No WGS		No tumour/no malignancy
732	F	44.4119	CUP		Histology	PASS	45		YES		7.41625	8
733	F	68.5193	Uterus/Endometrium		Histology	PASS	86		YES		16.4147	9
734	F	35.9599	Cervix		Histology	PASS	44		YES		15.6186	5
735	M	64.2071	Colorectum (Appendix; mucinous adenocarcinoma)		Histology	No WGS		No tumour/no malignancy
736	M	65.5213	CUP		Histology	No WGS		No tumour/no malignancy
737	F	71.3832	CUP		Histology	PASS	19		YES		0.568344	6
738	M	82.1432	Mesothelioma		Cytology	No WGS		Cancelled
739	M	56.9899	Thyroid (Medullary carcinoma)		Histology	PASS	75		YES		1.61036	6
740	F	68.314	CUP		Histology	FAIL	14	Low final mTCP			1.42882	4
741	M	50.1588	Oesophagus/Stomach (Oesophagus)		Histology	PASS	27		YES		-633.432	6
742	F	41.4987	Pancreas (NEC)		Histology	No WGS		No tumour/no malignancy
743	F	61.2748	Breast (ER positive, Her2 negative)		Histology	PASS	67		YES		4.49887	6
744	M	61.7484	Soft tissue (Sarcoma NOS)		Histology	PASS	80		YES		-112.32	9
745	F	62.4411	Mesothelioma		Histology	PASS	47		YES		10.4367	5
746	M	50.011	Lung (NSCLC)		Histology	PASS	50		YES		-4.44745	4
747	F	57.4307	Soft tissue (Leiomyosarcoma)		Histology	PASS	91		YES		9.38605	4
748	F	66.6055	CUP		Histology	PASS	93		YES		8.6512	6
749	M	69.724	Bladder (UCC)		Histology	No WGS		No tumour/no malignancy
750	F	63.4651	CUP		Histology	PASS	42		YES		6.51575	5
751	F	68.8917	CUP		Histology	PASS	24		YES		0.523866	6
752	M	74.5154	Melanoma (Mucosal)		Histology	PASS	91		YES		8.53398	7
753	M	57.3103	CUP		Histology	PASS	56		YES		1.58785	4
754	F	78.4662	Uterus/Endometrium		Histology	PASS	62		YES		7.48188	7
755	F	72.0923	Breast (TNBC)		Histology	PASS	24		YES		2.46015	5
756	M	73.8692	Lung (NSCLC)		Histology	PASS	92		YES		13.4767	5
757	F	38.5117	Breast (TNBC)		Histology	PASS	62		YES		49.3834	9
758	F	71.2354	Ovary		Histology	PASS	79		YES		15.5224	8
759	F	64.9765	Breast (ER positive, Her2 negative)		Histology	PASS	86		YES		21.5601	7
760	M	62.411	Soft tissue (Angiosarcoma)		Histology	PASS	33		YES		0.53728	6
761	M	84.7415	Lung (NSCLC)		Histology	PASS	33		YES		-71.4948	5
762	M	52.2095	Colorectum (Colon)		Histology	PASS	30		YES		11.456
763	F	44.8062	Soft tissue (Leiomyosarcoma)		Histology	PASS	83		YES		11.4033	10
764	F	66.548	Breast (ER positive, Her2 negative)		Histology	PASS	45		YES		9.53834	7
765	F	55.6292	Lung (NSCLC)		Histology	PASS	17		YES		22.4073	8
766	M	75.8296	Lung (NSCLC)		Cytology	FAIL		Low pTCP			0.62172
767	F	83.5697	Skin (SCC)		Histology	PASS	53		YES		0.617184	3
768	M	54.3478	CUP		Histology	PASS	51		YES		0.628156	8
769	F	56.7955	Lung (NSCLC)		Histology	PASS	34		YES		8.46223	3
770	F	49.4497	Soft tissue (Leiomyosarcoma)		Histology	PASS	83		YES		16.6836	7
771	M	59.7306	Skin (SCC)		Histology	No WGS		Cancelled
772	M	58.9558	Soft tissue (Pleomorphic liposarcoma)		Histology	PASS	86		YES		-1505.31	6
773	F	73.4147	CUP		Histology	PASS	35		YES		16.6213	7
774	F	73.13	CUP		Histology	No WGS		No tumour/no malignancy
775	M	70.6221	Kidney (Clear cell RCC)		Histology	No WGS		Cancelled
776	F	69.0067	Soft tissue (Sarcoma NOS)		Histology	PASS	82		YES		-620.275	5
777	M	59.9633	CUP		Histology	PASS	29		YES		13.3814	8
778	M	71.9883	Lung (NSCLC)		Histology	No WGS		Missing tissue sample
779	F	59.0571	Bladder (UCC)		Histology	PASS	80		YES		6.70764	4
780	M	33.8791	Lung (NSCLC)		Cytology	No WGS		Biopsy failure
781	F	68.6973	Breast (TNBC)		Histology	PASS	48		YES		4.72507	8
782	F	64.3303	CUP		Histology	FAIL		Low pTCP			10
783	F	40.4392	Breast (ER positive, Her2 positive)		Histology	PASS	23		YES		6.477	7
784	M	59.2295	CUP		Histology	PASS	34		YES		14.658	7
785	M	70.3893	Bladder (UCC)		Histology	PASS	78		YES		15.4362	5
786	M	66.392	Lung (NSCLC)		Histology	PASS	27		YES		9.40825	7
787	M	57.2254	Pancreas (Neuro-endocrine; NET)		Histology	PASS	69		YES		9.61388	5
788	M	62.307	Bladder (UCC)		Histology	PASS	53		YES		20.5233	5
789	M	64.6561	Lung (Carcinoid; atypical carcinoid)		Histology	No WGS		No tumour/no malignancy
790	M	65.2913	Lung (NSCLC)		Histology	PASS	28		YES		14.4162	11
791	M	61.9182	Skin (SCC)		Histology	No WGS		Incorrect request
792	M	54.2821	Colorectum (Colon)		Histology	PASS	71		YES		9.41663	11
793	M	70.132	Soft tissue (Radiation-induced oropharynx sarcoma)		Histology	FAIL	12	Low final mTCP			0.604317	6
794	F	60.8723	CUP		Histology	FAIL		Low pTCP			10.4263
795	M	52.497	Head and neck (Nasopharynx; SCC)		Histology	PASS	19		YES		0.535039	5
796	F	65.2804	Lung (NSCLC)		Histology	PASS	30		YES		7.53107	7
797	F	46.156	Head and neck (Oropharynx)		Histology	PASS	65		YES		9.60354	9
798	F	78.8221	Soft tissue (Undifferentiated pleiomorphic sarcoma/sarcoma NOS)		No sample	No WGS		Cancelled
799	F	65.6253	Colorectum (Colon)		Histology	PASS	88		YES		6.43925	3
800	M	58.044	CUP		Histology	PASS	80		YES		11.5149	9
801	F	58.6382	Ovary		Histology	PASS	38		YES		12.4172	9
802	M	82.4964	Head and neck (SCC)		Cytology	No WGS		Cancelled
803	M	59.4157	Lung (NSCLC)		Cytology	PASS	58		YES		0.653773	9
804	F	71.3339	Lung (NSCLC)		Histology	PASS	25		YES		9.476	6
805	F	35.0318	Breast (ER positive, Her2 negative)		Histology	FAIL	14	Low final mTCP			18.445	4
806	F	42.9197	Soft tissue (Spindle cell sarcoma)		Histology	PASS	18		YES		-399.444	7
807	M	56.801	CUP		Histology	PASS	64		YES		6.63877	7
808	F	43.9328	Lung (NSCLC)		Histology	FAIL		Low DNA quantity			15.6715	15
809	M	65.7787	Pancreas		Cytology	PASS	48		YES		0.52124	11
810	M	77.3546	Mesothelioma		Histology	PASS	18		YES		15.4755	6
811	M	23.3299	Soft tissue (Myxoid liposarcoma)		Histology	PASS	80		YES		3.39924	5
812	M	66.997	Soft tissue (Liposarcoma)		Histology	PASS	84		YES		-35.5032	6
813	M	79.0412	Salivary gland		Histology	PASS	48		YES		8.65111	6
814	M	19.6884	Colorectum (Appendix; goblet cell)		Histology	PASS	50		YES		-6.54769	7
815	F	64.511	CUP		Histology	PASS	54		YES		3.50017	15
816	F	47.169	CUP		Histology	No WGS		No tumour/no malignancy
817	F	60.9134	Lung (NSCLC)		Histology	No WGS		Missing blood sample
818	M	62.5452	Soft tissue (Low grade sarcoma)		Histology	PASS	47		YES		2.58584	9
819	F	63.3364	GIST		Histology	PASS	84		YES		1.52446	3
820	F	41.7452	Soft tissue (Spindle cell/pleomorphic sarcoma)		Histology	PASS	84		YES		8.68807	10
821	F	45.8876	Oesophagus/Stomach (GEJ; adenocarcinoma)		Histology	PASS	58		YES		-9.32991	13
822	F	68.7	CUP		Histology	No WGS		Cancelled
823	F	51.3936	CUP		Histology	PASS	63		YES		8.43703	11
824	M	73.7104	Prostate		Histology	PASS	52		YES		13.4642	7
825	M	62.7149	Skin (SCC)		Histology	FAIL	10	Low final mTCP			6.64952	7
826	F	75.4025	Breast (Angiosarcoma)		Histology	PASS	77		YES		-55.2718	11
827	M	51.7194	Soft tissue (Sarcoma NOS)		Histology	PASS	86		YES		2.68152	8
828	F	62.1126	CUP		Histology	PASS	68		YES		11.5284	4
829	F	37.4493	Breast (ER positive, Her2 negative)		Histology	PASS	67		YES		8.46038	4
830	M	59.1721	Bladder (UCC)		Cytology	No WGS		No tumour/no malignancy
831	F	68.0238	Lung (SCLC)		Histology	No WGS		No tumour/no malignancy
832	F	51.9576	Bone (Osteosarcoma)		Histology	PASS	39		YES		31.3871	8
833	F	42.0244	Breast (ER positive, Her2 negative)		Histology	PASS	75		YES		6.65089	7
834	M	71.7063	Urothelial tract		Histology	PASS	31		YES		13.3876	8
835	M	74.8549	CUP		Histology	PASS	61		YES		9.45226	5
836	F	56.2397	Soft tissue (Leiomyosarcoma)		Histology	PASS	84		YES		35.493	5
837	F	40.1955	Breast (ER negative, Her2 positive)		Histology	No WGS		No tumour/no malignancy
838	M	49.9124	Soft tissue (Pleomorphic sarcoma NOS)		Histology	PASS	53		YES		-155.494	5
839	F	74.3648	CUP		Histology	No WGS		Cancelled
840	F	59.0297	Lung (NSCLC)		Histology	PASS	47		YES		13.3829	7
841	F	70.4769	CUP		Histology	PASS	28		YES		13.5423	6
842	F	81.2288	CUP		Histology	PASS	90		YES		-43.5372	9
843	M	51.484	CUP		Histology	PASS	55		YES		5.52318	6
844	F	60.0728	Lung (NSCLC)		Histology	PASS	26		YES		11.4188	8
845	M	61.0968	Prostate		Histology	PASS	70		YES		15.5077	9
846	F	32.4116	Ovary (Mucinous carcinoma)		Histology	FAIL		Low pTCP			-261
847	F	47.9904	Mesothelioma		No sample	No WGS		Cancelled
848	M	67.8157	CUP		Histology	PASS	17		YES		0.642637	6
849	M	73.4777	CUP		Histology	PASS	21		YES		3.5784
850	F	46.3586	CUP		Histology	PASS	32		YES		0.669885	4
851	F	40.4857	CUP		Histology	PASS	50		YES		7.48307	5
852	F	79.2274	CUP		Histology	PASS	44		YES		6.41359	9
853	M	76.0431	Colorectum (Colon; adenocarcinoma)		Histology	No WGS		Missing blood sample
854	F	71.249	CUP		Histology	No WGS		No tumour/no malignancy
855	F	69.9978	Peritoneum (pseudomyxoma peritonei)		Histology	No WGS		No tumour/no malignancy
856	F	71.249	CUP		Histology	No WGS		No tumour/no malignancy
857	M	70.7562	CUP		Histology	PASS	47		YES		14.6587	7
858	M	52.3628	CUP		Histology	PASS	39		YES		17.3924	9
859	F	67.4433	Skin (Merkel cell carcinoma/NEC)		Histology	No WGS		No tumour/no malignancy
860	F	37.2741	Lacrimal sac		Cytology	No WGS		No tumour/no malignancy
861	M	74.3319	Colorectum (Sigmoid)		Cytology	PASS	37		YES		0.445171	10
862	M	50.6982	Kidney (Clear cell RCC)		Histology	FAIL		Low DNA quantity			0.659278
863	M	65.8115	Pancreas (NET)		Histology	FAIL (Second WGS)		Low DNA quality			110	8
864	M	65.8115	Pancreas (NET)		Histology	No WGS		No tumour/no malignancy
865	M	65.8115	Pancreas (NET)		Histology	FAIL		Low DNA quality			6.42005
866	F	61.3323	Lung (NSCLC)		Histology	PASS	46		YES		5.59809	7
867	M	71.4106	Prostate		Histology	PASS	64		YES		9.61076	4
868	F	46.4681	Vulva		Histology	PASS	59		YES		-369.539	7
869	M	49.0089	Soft tissue (Fibrosarcoma)		Histology	PASS	36		YES		0.614547	6
870	F	76.7194	Biliary tract		Histology	PASS	32		YES		6.47097	6
871	F	61.1461	Lung (NSCLC)		Histology	PASS	57		YES		6.41952	8
872	M	66.3016	CUP		Histology	PASS	34		YES		3.51752	8
873	F	61.231	Breast (TNBC)		Histology	PASS	57		YES		-90.3659	7
874	F	77.8283	CUP		Histology	PASS	79		YES		9.50373	9
875	F	42.7034	Breast (ER positive, Her2 negative)		Histology	PASS	72		YES		-276.398	4
876	F	42.5419	Breast (ER positive, Her2 negative)		Histology	No WGS		No tumour/no malignancy
877	F	68.4126	Lung (NSCLC)		No sample	No WGS		Cancelled
878	M	53.0774	Head and neck (Hypopharynx; SCC)		Histology	No WGS		No tumour/no malignancy
879	M	79.3779	Urothelial tract (UCC)		Histology	No WGS		No tumour/no malignancy
880	F	51.2786	Oesophagus/Stomach (Oesophagus; radiation-induced sarcomatoid carcinoma)		Histology	PASS	43		YES		0.434933	7
881	M	89.9682	Soft tissue (Angiosarcoma)		Cytology	No WGS		Cancelled
882	F	62.8683	Lung (NSCLC)		Histology	PASS	44		YES		0.640112	12
883	F	79.0193	Ovary (High grade serous carcinoma)		Histology	PASS	50		YES		29.513	4
884	M	77.5463	GIST		Histology	PASS	27		YES		13.4241	10
885	F	78.3512	Skin (SCC)		Histology	PASS	20		YES		0.682205	7
886	M	33.8079	CUP		Histology	No WGS		Cancelled
887	M	54.7065	CUP		Histology	PASS	84		YES		6.61267	8
888	F	68.3551	CUP		Histology	PASS	81		YES		7.47633	9
889	F	59.2159	Lung (Carcinoid; atypical carcinoid)		Histology	PASS	94		YES		6.61391	7
890	M	57.5622	Lung (NSCLC)		Histology	PASS	15		YES		9.63011	6
891	M	58.6436	Lung (Carcinoid; atypical carcinoid)		Histology	PASS	63		YES		8.39668	3
892	F	73.6502	CUP		Histology	PASS	88		YES		-16.4202	8
893	F	73.9322	Uterus/Endometrium		Histology	No WGS		No tumour/no malignancy
894	F	62.2495	CUP		Histology	PASS	44		YES		6.37719	6
895	M	50.3313	Lung (Carcinoid; atypical carcinoid)		Histology	PASS	94		YES		14.391	3
896	M	76.6318	Urothelial tract		Histology	PASS	48		YES		7.51434	9
897	F	62.1071	CUP		Histology	PASS	57		YES		14.5284	8
898	M	70.0471	Urothelial tract		Histology	PASS	62		YES		-15.3841	12
899	M	67.0244	Benign tumour (Leiomyoma)		Histology	PASS	24		YES		-8.4945	4
900	M	50.8542	Colorectum (Colon)		Histology	PASS	30		YES		7.42885	7
901	M	40.2502	Urachus		Histology	PASS	72		YES		6.39404	13
902	F	49.6495	CUP		Histology	PASS	54		YES		5.6128	8
903	F	53.5922	CUP		Histology	PASS	36		YES		14.397	9
904	M	38.8128	Colorectum (Rectum)		Histology	PASS	32		YES		-141.514	6
905	M	64.1469	Lung (NSCLC)		Histology	PASS	38		YES		7.6152	10
906	M	75.9747	Oesophagus/Stomach (GEJ)		Histology	No WGS		Cancelled
907	M	79.1261	Soft tissue (Spindle cell sarcoma)		Histology	PASS	32		YES		-19.4768	6
908	M	75.7201	CUP		Histology	PASS	64		YES		1.7002	12
909	M	58.6354	CUP		Histology	PASS	91		YES		14.3979	9
910	F	73.7789	Soft tissue (Nerve sheath sarcoma)		Histology	PASS	87		YES		-45.4564	6
911	F	49.5428	Lung (Carcinoid; atypical carcinoid)		Histology	PASS	86		YES		8.46906	9
912	F	52.3108	Soft tissue (Leiomyosarcoma)		Histology	PASS	84		YES		0.649746	10
913	F	73.7707	CUP		Histology	PASS	47		YES		7.59822	7
914	F	51.5661	Breast (ER positive, Her2 negative)		Histology	PASS	20		YES		-474.333	5
915	F	68.0292	Uterus/Endometrium		Histology	PASS	95		YES		-522.473	10
916	F	41.496	Soft tissue (Undifferentiated pleiomorphic sarcoma/sarcoma NOS)		Histology	FAIL		Low DNA quality			-14
917	M	65.483	Prostate		Histology	PASS	39		YES		7.37975	8
918	M	43.7657	Penis		Histology	PASS	16		YES		-216.615	9
919	M	75.8624	Head and neck (SCC)		Histology	PASS	15		YES		1.63611	6
920	M	57.5211	Penis		Histology	FAIL	12	Low final mTCP			0.484218	9
921	F	45.4496	Colorectum (Rectum)		Histology	No WGS		Incorrect request
922	F	72.1005	Lung (NSCLC)		Histology	PASS	45		YES		9.46362	7
923	M	57.2035	Soft tissue (sarcoma NOS)		Histology	PASS	79		YES		-1	6
924	F	36.2145	Colorectum (Colon; adenocarcinoma)		Histology	FAIL	8	Low final mTCP			7.39826
925	F	71.6433	Soft tissue (Spindle cell sarcoma)		Histology	PASS	16		YES		0.66087	3
926	F	74.8768	CUP		Histology	PASS	59		YES		0.682414	8
927	M	65.9375	Urothelial tract (UCC)		Histology	PASS	26		YES		-410.367	8
928	M	57.1953	Testis (Seminoma)		Histology	PASS	19		YES		6.40686	8
929	F	60.5301	CUP		Histology	PASS	62		YES		21.3877	7
930	M	73.4777	CUP		Histology	No WGS		No tumour/no malignancy
931	M	75.1123	Penis		Histology	PASS	16		YES		7.49362	7
932	F	76.5935	Lung (NSCLC)		Histology	PASS	23		YES		12.4936	11
933	M	72.1745	Soft tissue (Atypical lipomatous tumour/well-differentiated liposarcoma)		Histology	No WGS		Cancelled
934	F	61.0886	Ovary (Low grade serous carcinoma)		Histology	PASS	92		YES		8.4086	12
935	F	72.848	CUP		Histology	FAIL		Low pTCP			12.4273
936	F	40.8197	Colorectum (Colorectum; Sigmoid)		Histology	PASS	98		YES		-33.3736	5
937	F	64.9326	Colorectum (Appendix; mucinous adenocarcinoma)		Histology	PASS	24		YES		-26.397	9
938	F	37.4439	Colorectum (Colon)		Histology	PASS	88		YES		-395.5
939	M	54.0494	Soft tissue (Leiomyosarcoma)		Histology	PASS	84		YES		-329.57	7
940	F	35.1084	Ovary (High grade adenocarcinoma)		Histology	PASS	32		YES		-4.60022	8
941	F	54.2602	Soft tissue (Leiomyosarcoma)		Histology	PASS	77		YES		-299.449	4
942	F	66.4467	Uterus/Endometrium		Histology	FAIL		Low pTCP			7.68159
943	F	58.3781	CUP		Histology	PASS	33		YES		3.59519	7
944	M	78.8249	Soft tissue (Spindle cell sarcoma)		Histology	PASS	75		YES		4.50263	11
945	M	66.1154	Lung (NSCLC)		Histology	PASS	35		YES		2.57922	6
946	F	78.447	Lung (NSCLC)		Histology	PASS	26		YES		8.38885	10
947	F	70.6056	Lung (NSCLC)		Histology	No WGS		No tumour/no malignancy
948	F	70.058	Lung (NSCLC)		Cytology	FAIL		Low DNA quality			10.5214
949	M	72.5222	Thymus		Histology	PASS	92		YES		9.41193
950	M	72.3689	Thymus		Cytology	No WGS		Incorrectly processed
951	M	54.8954	Lung (NSCLC)		Histology	No WGS		Missing blood sample
952	F	67.9772	Lung (NSCLC)		Histology	PASS	34		YES		9	7
953	F	57.198	Soft tissue (Spindle cell sarcoma)		Histology	PASS	36		YES		-39.5046
954	M	69.275	Soft tissue (Liposarcoma)		Histology	PASS	81		YES		-287.344	4
955	M	60.2973	Lung (NSCLC)		Cytology	FAIL		Low pTCP			0.629652
956	F	80.2212	CUP		Histology	PASS	89		YES		0.704053	6
957	F	65.3433	CUP		Histology	No WGS		Cancelled
958	M	58.8983	Soft tissue (Radiation-induced breast sarcoma)		Histology	PASS	59		YES		-13.3359	5
959	F	65.483	Soft tissue (Spindle cell sarcoma)		Histology	PASS	94		YES		-121.394	9
960	M	62.3563	Colorectum (Caecum)		Histology	PASS	37		YES		-139.374	4
961	F	22.7659	Lung (NSCLC)		Histology	PASS	26		YES		-18.2998	9
962	F	63.5828	Brain/central nervous system (Esthesioneuroblastoma)		Histology	PASS	94		YES		-1293.65	9
963	M	67.2352	Kidney (Papillary RCC)		Histology	PASS	23		YES		8
964	M	58.2494	Oesophagus/Stomach (Oesophagus; NEC)		Histology	No WGS		Cancelled
965	M	59.1857	Prostate		Histology	PASS	85		YES		0.437493	5
966	F	65.0668	CUP		Histology	PASS	56		YES		2.52373
967	M	76.525	Mesothelioma		Histology	PASS	39		YES		8	4
968	M	81.6942	Bone (Chondrosarcoma)		Histology	PASS	65		YES		16
969	M	74.0554	Colorectum (Rectum)		Histology	PASS	80		YES		8
970	F	32.198	Urachus (Colloid type carcinoma)		Histology	FAIL		Low pTCP			-196.537
971	F	50.0493	Lung (Carcinoid; atypical carcinoid)		Histology	PASS (Second WGS)	67		YES		0	7
972	M	69.3407	CUP		Cytology	No WGS		Cancelled
973	M	41.8191	Kidney (Oncocytoma)		Histology	PASS	79		YES		-12.5297	9
974	M	61.7512	Kidney (Oncocytoma)		Histology	PASS	78		YES		-402	6
975	F	64.8067	Soft tissue (Uterine sarcoma)		Histology	PASS	83		YES		20
976	M	55.0706	Colorectum (Colon)		Histology	PASS	67		YES		-9
977	F	70.863	Ovary (High grade serous carcinoma)		Histology	PASS	32		YES		-14.5562
978	F	51.3142	Cervix (SCC)		Histology	No WGS		No tumour/no malignancy
979	F	63.8238	CUP		Histology	PASS	50		YES		18
980	M	61.0667	Lung (NSCLC)		Histology	PASS	66		YES		4
981	M	71.8048	Prostate		Histology	No WGS		No tumour/no malignancy
982	M	71.8048	Prostate		Histology	No WGS		No tumour/no malignancy
983	F	53.1075	Breast (TNBC)		Histology	No WGS		Missing blood sample
984	F	48.0396	Lung (NSCLC)		Histology	No WGS		Cancelled
985	M	57.9071	Colorectum (Appendix; goblet cell)		Histology	No WGS		Missing blood sample
986	F	74.0937	Colorectum (Rectum)		Histology	No WGS		Missing blood sample
987	F	68.763	Head and neck (Oropharynx)		Histology	No WGS		Cancelled
988	M	62.5287	Small intestine (Duodenum)		Histology	No WGS		Cancelled
989	F	59.4623	Melanoma		Histology	No WGS		Missing blood sample
990	F	62.9531	Lung (NSCLC)		Histology	FAIL	11	Low final mTCP			0	7
991	F	49.3593	CUP		Histology	FAIL	12	Low final mTCP			-3	4
992	M	79.7777	Lung (Carcinoid; typical carcinoid)		Histology	FAIL	<15	Low final mTCP			0	6
993	M	72.5632	Colorectum (Caecum; signet ring)		Histology	FAIL	12	Low final mTCP			-3	9
994	M	31.8695	Penis		Histology	PASS	96		NO
995	F	66.9341	Lung (NSCLC)		Cytology	PASS	15		NO
996	F	50.0794	Lung (NSCLC)		Cytology	PASS	55		NO
997	F	62.9997	CUP		Histology	PASS	80		NO
998	M	32.9783	Lung (NSCLC)		Histology	PASS	35		NO
999	M	63.4158	Lung (NSCLC)		Histology	PASS	42		NO
1000	M	62.0387	Colorectum (Rectum)		Histology	PASS	67		NO
1001	F	44.0039	Breast (ER positive, Her2 negative)		Histology	PASS	31		NO
1002	F	62.4795	Colorectum (Appendix; goblet cell)		Histology	PASS	23		NO
1003	F	25.7009	CUP		Histology	PASS	24		NO
1004	F	58.786	Soft tissue (Liposarcoma)		Histology	PASS	96		NO
1005	M	79.4929	Soft tissue (Liposarcoma)		Histology	PASS	17		NO
1006	F	66.2332	Lung (NSCLC)		Histology	PASS	82		NO
1007	M	64.6506	Soft tissue (Myxofibrosarcoma)		Histology	PASS	46		NO
1008	F	83.1809	Soft tissue (Liposarcoma)		Histology	PASS	24		NO
1009	F	73.8501	CUP		Histology	PASS	50		NO
1010	F	70.518	Soft tissue (Leiomyosarcoma)		Histology	PASS	78		NO
1011	M	63.3885	Soft tissue (Undifferentiated pleiomorphic sarcoma/sarcoma NOS)		Histology	PASS	72		NO
1012	F	66.0607	Soft tissue (Leiomyosarcoma)		Histology	PASS	40		NO
1013	F	77.6886	Lung (NSCLC)		Histology	PASS	32		NO
1014	F	69.8308	Soft tissue (Malignant Peripheral Nerve Sheath Tumour)		Histology	PASS	73		NO
1015	F	44.4365	Lung (NSCLC)		Histology	PASS	18		NO
1016	M	69.5625	Soft tissue (Leiomyosarcoma)		Histology	PASS	94		NO
1017	F	45.2387	Ovary (Low grade serous carcinoma)		Histology	PASS	100		NO
1018	M	54.3259	Soft tissue (Sarcoma NOS)		Histology	PASS	49		NO
1019	M	73.4969	Urothelial tract (UCC)		Histology	PASS	19		NO
1020	F	72.6098	Breast (ER positive, Her2 positive)		Histology	PASS	37		NO
1021	F	49.3456	Breast (ER positive, Her2 negative)		Histology	PASS	77		NO
1022	F	45.4906	Breast (ER positive, Her2 negative)		Histology	PASS	60		NO
1023	F	42.5419	Lung (Carcinoid; atypical carcinoid)		Histology	PASS	79		NO
1024	F	55.6785	Lung (NSCLC)		Histology	PASS	34		NO
1025	F	45.7069	Breast (ER positive, Her2 negative)		Histology	PASS	19		NO
1026	M	37.4959	Colorectum (Colon)		Histology	PASS	52		NO
1027	F	53.1158	Colorectum (Appendix; signet ring)		Histology	PASS	34		NO
1028	F	46.4051	Colorectum (Sigmoid)		Histology	PASS	33		NO
1029	F	49.1567	Cervix (adeno)		Histology	PASS	37		NO
1030	F	52.2451	Lung (SCLC)		Cytology	PASS	96		NO
1031	M	49.2252	CUP		Histology	PASS	58		NO
1032	M	62.9121	Kidney (RCC)		Histology	PASS	17		NO
1033	M	52.8474	Skin (BCC)		Histology	PASS	82		NO
1034	F	60.0016	Soft tissue (Desmoplastic small round cell tumour)		Histology	PASS	99		NO
1035	M	59.1666	Lung (Carcinoid; atypical carcinoid)		Histology	PASS	24		NO
1036	F	41.5562	CUP		Histology	PASS	27		NO
1037	M	75.345	CUP		Histology	PASS	50		NO
1038	F	30.8537	Colorectum (Colon)		Histology	PASS	94		NO
1039	F	65.4036	Colorectum (Colon)		Histology	PASS	55		NO
1040	F	53.469	Small intestine (NEC)		Histology	PASS	94		NO
1041	M	51.4429	Head and neck (Nasopharynx SCC)		Histology	PASS	46		NO
1042	M	73.9213	Mesothelioma		Histology	PASS	39		NO
1043	M	35.0318	Soft tissue (Spindle cell sarcoma)		Histology	PASS	54		NO
1044	M	51.4319	Kidney (Clear cell RCC)		Histology	PASS	15		NO
1045	F	62.2139	CUP		Histology	PASS	92		NO
1046	F	44.0286	Colorectum (Sigmoid)		Histology	PASS	24		NO
1047	F	76.0021	Adrenal gland (adrenocortical carcinoma)		Histology	PASS	34		NO
1048	F	45.3264	Melanoma		Histology	PASS	84		NO
1049	M	56.6094	Prostate		Histology	PASS	18		NO
1050	F	73.8035	Colorectum (Colon)		Histology	PASS	35		NO
1051	M	66.099	Colorectum (Colon)		Histology	PASS	53		NO
1052	F	66.0004	Lung (NSCLC)		Histology	PASS (Second WGS)	58		NO

## Sheet: Supp T2A. Actionability
Sample ID	Diagnosis category	Tumour type (with subtype information or diagnosis after CUP, if available)		Number of treatment decisions before WGS as described in medical history	Pretreatments		Number of biomarkers in Molecular Tumour Board conclusion	Number of biomarkers with any actionability in Electronic Health Record		Number of experimental trial biomarkers	Experimental trial biomarkers		Number of standard-of-care treatment biomarkers	Number of negative predictive biomarkers guiding treatment	Reimbursed care biomarkers		Biomarkers without actionability		TML	TMB (in variants/Mb)		Follow-up (in months)	>3mo follow-up for treatment analysis	Reason for loss-to-followup <3mo		Number of treatment changes after WGS as described in medical history	Posttreatments	WGS-informed targeted treatment	Targeted biomarker	Targeted treatment	Setting	If study, which	If trial, NCT	Phase	Reason for (no) WGS-informed standard-of-care treatment
1	Known primary tumour	Soft tissue (Spindle cell sarcoma)		1	carboplatin-pemetrexed-pembrolizumab		6	2		2	KIT amp; HRD no substrate		0	0			TP53 inact mut; RB1 loss; TERTp mut VUS; HIST1H3B mut VUS		36	1.5		15.3101	YES			0		NO							No actionable standard-of-care biomarkers
2	Known primary tumour	Lung (NSCLC)		1	osimertinib		5	4		2	CDKN2A loss; CCND1 amp		2	0	EGFR act mut; MET amp		TP53 inact mut		113	6.1		11.7618	YES			3	osimertinib-savolitinib (M19ORC); carboplatin-pemetrexed; carboplatin-pemetrexed-pembrolizumab; carboplatin-gemcitabine	YES	EGFR+MET	osimertinib-savolitinib	Experimental trial	ORCHARD (M19ORC)	NCT03944772	II	Study treatment for standard-of-care biomarker
3	Known primary tumour	Lung (NSCLC)		3	carboplatin-pemetrexed; osimertinib (TATIN); osimertinib-crizotinib		5	2		0			2	0	EGFR act mut; BRAF V600E resist mut;		EGFR resist mut; MET resist mut; TP53 mut		114	5.9		0.854209	NO	Deceased		2	dabrafenib-trametinibetinib; osimertinib	YES	BRAF	dabrafenib-trametinibetinib	Reimbursed care				Treated but less than 3 months follow-up
5	Known primary tumour	Ovary (Embryonal cell carcinoma)		0			0	0		0			0	0					34	1.6		28.6817	YES			3	EP; VIP; TIP	NO							No actionable standard-of-care biomarkers
7	Cancer of unknown primary	CUP (Biliary tract)		0			5	2		2	NRAS act mut; CDKN2A inact mut		0	0			PBRM1 inact mut VUS; BAP1 inact mut; EPHA2 mut VUS		38	1.5		1.21561	NO	Second opinion		0		NO							Insufficient follow-up
8	Known primary tumour	Colorectum (Colon; signet cell)		4	COLOPEC; reltitrexed-oxaliplatin (TOMOX); olaparib (DRUP); irinotecan-bevacizumab		7	2		2	RNF43 inact mut; ATM mut		0	0			SMAD4 inact mut; TP53 inact mut; KRAS amp; IL7R amp; LMBRD2 amp		112	6.6		-0.854209	NO	Deceased		0		NO							Insufficient follow-up
9	Known primary tumour	Lung (NSCLC)		8	cisplatin-pemetrexed; erlotinib; osimertinib; carboplatin-pemetrexed; pemetrexed mono; osimertinib; paclitaxel-bevacizumab; osimertinib retreatment		10	1		0			1	0	EGFR act mut		TML low; TP53 inact mut; KMT2C inact mut; MAP3K1 mut VUS; PTPRD part loss; PLXNB2 part loss; WWC3 part loss; CCND3 amp; VEGFA amp		131	6		28.2546	YES			6	T-DM1-osimertinib (M18TEO); osimertinib; patritumumab-deruxtecan; osimertinib retreatment; carboplatin-paclitaxel-atezolizumab-bevacizumab; osimertinib retreatment	NO							Standard-of-care biomarker was already treated before WGS
12	Cancer of unknown primary	CUP (Colorectum; Colon)		1	carboplatin-etoposide		5	2		1	KRAS act mut		1	0	KRAS present		APC inact mut; TP53 inact mut; RB1 part loss; TERTp act mut VUS		133	8.2		7.55647	YES			1	CAPOX	YES	KRAS present	no EGFR inhibitor	Reimbursed care				Actionable standard-of-care biomarker was treated
14	Cancer of unknown primary	CUP (Definitive CUP; possibly Anus)		1	mitomycine-capecitabine		1	0		0			0	0			HPV type 16		90	4.4		12.5503	YES			0		NO							No actionable biomarkers detected
16	Known primary tumour	Lung (Carcinoid; atypical carcinoid)		0			0	0		0			0	0					22	0.6		8.27926	YES			2	everolimus; capecitabine-temozolomide	NO							No actionable standard-of-care biomarkers
17	Known primary tumour	Lung (NSCLC)		3	carboplatin-paclitaxel-pembrolizumab; gemcitabine mono; vinorelbine		3	2		2	TMB high; PIK3CA act mut		0	0			TP53 inact mut		736	48.7		0.262834	NO	Second opinion		0		NO							Insufficient follow-up
18	Known primary tumour	Lung (Carcinoid; atypical carcinoid)		1	carboplatin-etoposide		0	0		0			0	0					37	1.6		13.6345	YES			0		NO							No actionable standard-of-care biomarkers
20	Known primary tumour	Lung (NSCLC)		2	carboplatin-pemetrexed-pembrolizumab; pembrolizumab mono		2	1		1	CDKN2A loss		0	0			KRAS act mut		51	2.4		28.5175	YES			0		NO							No actionable standard-of-care biomarkers
21	Known primary tumour	Lung (NSCLC)		2	gefitinib; osimertinib		6	3		2	PIK3CA act mut; BRAF act mut		1	0	EGFR act mut		TP53 inact mut; RB1 loss; SMAD4 mut VUS		137	5.6		9.82341	YES			1	carboplatin-pemetrexed	NO							Standard-of-care biomarker was already treated before WGS
22	Known primary tumour	Kidney (Sarcomatoid dedifferentiated RCC)		0			3	1		1	TSC1 loss		0	0			PTEN inact mut; TP53 inact mut		24	1.1		8.08214	YES			2	ipilimumab-nivolumab; cabozantinib	NO							No actionable standard-of-care biomarkers
23	Cancer of unknown primary	CUP (Soft tissue; Desmoplastic small round cell tumour)		0			2	0		0			0	0			ARID1A inact mut; EWSR1-WT1 fus		16	1.1		28.5175	YES			5	VIDE; EVAIA; VAI; pazopanib; VI(D)(E) retreatment	NO							No actionable biomarkers detected
26	Cancer of unknown primary	CUP (Ovary)		0			3	2		1	TMB high		1	0	HRD+BRCA2 full loss		TP53 inact mut		216	10.8		28.2218	YES			2	carboplatin-paclitaxel; olaparib	YES	HRD+BRCA2	olaparib	Reimbursed care				Actionable standard-of-care biomarker was treated
27	Known primary tumour	Lung (NSCLC)		3	pembrolizumab; alectinib; selpercatinib (LOXO-292)		6	2		1	CDKN2A loss		1	0	RET fus		BRAF resist fus; MAP2K4 mut VUS; ERBB4 inact mut VUS; ARID1A resist mut		86	6.8		7.8193	YES			1	carboplatin-pemetrexed	NO							Low performance status
28	Known primary tumour	Lung (NSCLC)		2	erlotinib; osimertinib		2	1		0			1	0	EGFR act mut		TP53 inact mut		20	0.8		6.83368	YES			2	carboplatin-pemetrexedosimertinib; pemetrexed-osimertinib	NO							Standard-of-care biomarker was already treated before WGS
30	Known primary tumour	Lung (LCNEC)		2	carboplatin-etoposide; osimertinib		5	3		2	CDKN2A loss; CDK4 amp		1	0	EGFR act mut		EGFR amp; MDM2 amp		86	4.7		4.33676	YES			2	carboplatin-pemetrexed-pembrolizumab; osimertinib retreatment	NO							Low performance status
32	Cancer of unknown primary	CUP (Biliary tract)		1	carboplatin-etoposide		4	1		1	CCND1 amp		0	0			NF1 inact splice mut; APC inact mut; TP53 inact mut		47	3.3		5.12526	YES			1	capecitabine	NO							No actionable standard-of-care biomarkers
33	Known primary tumour	Colorectum (Colon)		3	CAPOX-B; nivolumab (DRUP); FOLFIRI		6	1		0			1	0	KRAS present		MSI; PIK3CA act mut; PTEN mut; ERBB2 mut; APC mut		1602	61.8		9.23203	YES			2	FOLFIRI; TAS102	YES	KRAS present	no EGFR inhibitor	Reimbursed care				Actionable standard-of-care biomarker was treated
34	Cancer of unknown primary	CUP (Biliary tract)		0			4	0		0			0	0			BAP1 inact mut; IDH1 act mut; PBRM1 inact mut; ARID1A mut VUS		22	1.3		27.4004	YES			0		NO							No actionable biomarkers detected
35	Known primary tumour	Lung (LCNEC)		2	afatinib; carboplatin-etoposide-afatinib		5	0		0			0	0			EGFR act mut; TP53 inact mut; CCNE1 amp; IKBKB amp VUS; RB1 inact part loss		55	2.8		13.4374	YES			2	carboplatin-paclitaxel-atezolizumab-bevacizumab; atezolizumab-bevacizumab maintenance; carboplatin-gemcitabine	NO							No actionable standard-of-care biomarkers
36	Known primary tumour	Lung (NSCLC)		3	gefitinib; T-DM1-osimertinib (M18TEO); carboplatin-pemetrexed-osimertinib		7	3		2	CDKN2A loss; CCND1 amp		1	0	EGFR act mut		DNMT3A resist mut; MYC amp VUS; TP53 loss; FGF3 amp		82	4.7		26.152	YES			1	carboplatin-pemetrexed-osimertinib	NO							Ongoing response on previous treatment/complete remission
41	Cancer of unknown primary	CUP (Definitive CUP; possibly Cervix)		0			2	0		0			0	0			ELF3 splice mut VUS; HPV type 16		89	4.2		8.08214	YES			2	carboplatin-paclitaxel-bevacizumab; bevacizumab maintenance	NO							No actionable biomarkers detected
42	Known primary tumour	Uterus/endometrium		0			2	0		0			0	0			PTEN loss VUS; PIK3R1 mut VUS		70	2.6		6.14374	YES			0		NO							No actionable standard-of-care biomarkers
44	Known primary tumour	Soft tissue (Solitary fibrous tumour)		0			3	1		1	BRAF V600E act mut		0	0			NAB2-STAT6 fus; TERTp act mut		36	1.5		26.7105	YES			5	doxorubicine; pazopanib; vemurafenib-cobimetinib (DRUP); DTIC; trabectedine	YES	BRAF	vemurafenib-cobimetinib	Experimental trial	DRUP (M15DRU)		II	No actionable standard-of-care biomarkers
45	Known primary tumour	Kidney (Clear cell RCC)		0			1	1		1	VHL inact mut		0	0					17	0.7		27.1047	YES			1	avelumab-axitinib (N17JAV)	NO							No actionable standard-of-care biomarkers
47	Known primary tumour	Ovary (High grade serous carcinoma)		3	CMF (adjuvant); 6x carboplatin-paclitaxel; olaparib		3	2		1	TML high		1	0	HRD+BRCA1 inact mut				151	6		10.7433	YES			3	pembrolizumab (DRUP; 2021-04//2021-09); carboplatin-Caelyx; carboplatin-paclitaxel (advice by Leuven due to not eligible for REGENERON study)	YES	TML	pembrolizumab	Experimental trial	DRUP (M15DRU)		II	Standard-of-care biomarker was already treated before WGS
49	Known primary tumour	Breast (TNBC)		2	ddAC+carboplatin-paclitaxel; capecitabine		1	1		1	HRD+RAD51B inact mut		0	0			TP53 inact mut		74	3		0	NO	BSC		0		NO							Insufficient follow-up
50	Known primary tumour	Lung (NSCLC)		2	erlotinib; osimertinib		5	2		1	FGFR2 amp; CCND3 amp; CDK4 amp		1	0	EGFR act mut		TMB low; TP53 inact mut; EGFR T790M resist mut		84	5		26.8747	YES			4	osimertinib; carboplatin-paclitaxel-atezolizumab-bevacizumab; carboplatin-paclitaxel-osimertinib; carboplatin-pemetrexed-osimertinib	NO							Standard-of-care biomarker was already treated before WGS
51	Known primary tumour	Lung (NSCLC)		1	osimertinib (M18PST)		4	1		1	EGFR act exon 20 ins		0	0			RB1 loss; TP53 loss; POT1 mut VUS		128	7.4		4.07392	YES			1	CLN-081 (M19CLN)	NO							No actionable standard-of-care biomarkers
52	Known primary tumour	Prostate		4	ADT; docetaxel; abirateron-prednison; cabazitaxel		3	1		1	CCND1 amp		0	0			FGF3 coamp; AR resist amp		41	2.1		10.6448	YES			1	abemaciclib (DRUP)	YES	CCND1	abemaciclib	Experimental trial	DRUP (M15DRU)		II	No actionable standard-of-care biomarkers
53	Known primary tumour	Soft tissue (Liposarcoma)		0			2	1		1	CDK4 amp		0	0			MDM2 amp; HMGA2-PPFIA2 fus VUS		5	0.7		8.50924	YES			2	doxorubicine-ifosfamide; abemaciclib (DRUP); MDM2 inbibitor (Leuven)	YES	CDK4	abemaciclib	Experimental trial	DRUP (M15DRU)		II	No actionable standard-of-care biomarkers
54	Known primary tumour	Soft tissue (High grade undifferentiated spindle cell/pleomorphic sarcoma)		0			4	0		0			0	0			ATRX inact mut; FANCL mut VUS; RAC1 amp VUS; RB1 del VUS		38	2.4		6.34086	YES			1	adriamycin	NO							No actionable standard-of-care biomarkers
55	Known primary tumour	Mesothelioma		1	carboplatin-pemetrexed		0	0		0			0	0					16	1.2		9.36345	YES			2	lenvatinib-pembrolizumab (N19PEM); pembrolizumab mono	NO							No actionable standard-of-care biomarkers
56	Known primary tumour	Breast (ER positive, Her2 negative)		4	letrozole; exemestane; capecitabine; adriamycin		2	2		2	TMB high; PIK3CA act mut		0	0					299	12.9		17.4456	YES			2	pembrolizumab (DRUP); paclitaxel	YES	TMB	pembrolizumab	Experimental trial	DRUP (M15DRU)		II	No actionable standard-of-care biomarkers
57	Known primary tumour	Mesothelioma		1	carboplatin-pemetrexed		4	1		1	CDKN2A del		0	0			BAP1 inact mut; FBXW7 inact mut VUS; NF2 inact VUS		37	1.3		3.5154	YES			1	lenvatinib-pembrolizumab (N19PEM)	NO							No actionable standard-of-care biomarkers
58	Known primary tumour	Lung (NSCLC)		2	carboplatin-pemetrexed-pembrolizumab; pembrolizumab maintenance		5	1		1	TMB high		0	0			KRAS act mut; KEAP1 inact mut; STK11 inact mut; smoking signature		247	15.8		27.4004	YES			0		NO							No actionable standard-of-care biomarkers
59	Known primary tumour	Colorectum (Rectum)		0			4	1		1	NF1 inact mut		0	0			TP53 inact mut; APC inact mut; NRAS amp		71	4.2		15.4415	YES			4	FOLFOXIRI-B; CAPOX-B; irinotecan mono; sunitinib (SUNRISE)	NO							No actionable standard-of-care biomarkers
61	Known primary tumour	Lung (Carcinoid; atypical carcinoid)		1	carboplatin-paclitaxel		2	0		0			0	0			SDBH inact mut		26	1.4		27.5975	YES			2	capecitabine-temozolomide; everolimus	NO							No actionable standard-of-care biomarkers
63	Known primary tumour	Colorectum (Colon)		0			7	4		2	RNF43 inact mut; HRD no substrate		1	1	BRAF V600E act mut; KRAS absent		APC inact mut; TP53 inact mut; PTEN part del; SMAD4 part del; TML high		198	8		0.197125	NO	Second opinion		0		NO							Insufficient follow-up
64	Known primary tumour	Lung (NSCLC)		2	crizotinib; alectinib		5	1		0			1	0	ALK fus		ALK resist mut; KRAS resist act mut; TGFBR1 inact mut VUS; ZNF217 amp VUS		64	3		4.36961	YES			2	carboplatin-paclitaxel-atezo-bevacizumab; atezo-bevacizumab maintenance	NO							Standard-of-care biomarker was already treated before WGS
65	Known primary tumour	Lung (NSCLC)		0			4	3		3	KRAS act mut; CDKN2A loss; TMB high		0	0			SPEN inact mut VUS		243	25.4		27.1704	YES			1	ipilimumab-nivolumab (M19FNN)	YES	TMB	ipilimumab-nivolumablumab	Experimental trial	M17FNN	NCT05742607	N/A	No actionable standard-of-care biomarkers
67	Known primary tumour	GIST		0			1	0		0			0	0			SDHA inact mut		6	0.4		26.6448	YES			0		NO							No actionable standard-of-care biomarkers
68	Known primary tumour	Lung (NSCLC)		3	CCRT; pembrolizumab mono; carboplatin-pemetrexed-pembrolizumab		4	1		1	RAF1 act mut		0	0			TP53 inact mut; RB1 part del; STK11 inact mut		107	5.8		26.5133	YES			2	carboplatin-pembrolizumab; paclitaxel-bevacizumab	NO							No actionable standard-of-care biomarkers
69	Known primary tumour	Mesothelioma		2	carboplatin-pemetrexed; Mesopher (M17DNM)		2	0		0			0	0			NF2 loss; BAP1 loss		27	1		15.77	YES			1	lenvatinib-pembrolizumab (N19PEM)	NO							No actionable standard-of-care biomarkers
71	Known primary tumour	Melanoma		3	ipilimumab-nivolumablumab; nivolumab mono; ipilimumab-nivolumablumab		2	1		1	NRAS act mut		0	0			DGCR8 amp VUS		40	1.2		16.0986	YES			1	CyPep-1 (M19CPE)	NO							No actionable standard-of-care biomarkers
73	Known primary tumour	Salivary gland (Acinary cell)		0			2	2		2	PIK3CA act mut; CDKN2A loss		0	0					22	0.9		11.6304	YES			3	ribociclib (DRUP); carboplatin-paclitaxel; alpelisib (DRUP)	YES	(1.) CDKN2A; (2.) PIK3CA	(1.) ribociclib; (2.) alpelisib	Experimental trial	DRUP (M15DRU)		II	No actionable standard-of-care biomarkers
74	Known primary tumour	Small intestine (Jejunum)		1	CAPOX		6	2		2	ERBB2 mut; CCND3 amp		0	0			APC inact mut; TP53 inact mut; FBXW7 inact mut VUS; VEGFA amp VUS		130	8		2.75975	NO	Deceased		1	abemaciclib (DRUP)	YES	CCND3	abemaciclib	Experimental trial	DRUP (M15DRU)		II	Treated but less than 3 months follow-up
75	Known primary tumour	Head and neck (Nasopharynx)		1	carboplatin-gemcitabine		3	0		0			0	0			MTOR act del; TP53 inact mut; EBV		39	1.8		8.04928	YES			2	pembrolizumab-GSK3359609 (M16GAC); paclitaxel	NO							No actionable standard-of-care biomarkers
76	Known primary tumour	Lung (NSCLC)		3	erlotinib; osimertinib; trastuzumab-emtansine		5	3		1	CDKN2A loss		2	0	EGFR act mut; ERBB2 amp		TP53 inact mut; FOXA1 amp VUS		109	4.8		17.347	YES			3	carboplatin-pemetrexed; paclitaxel-bevacizumab; osimertinib retreatment	NO							Standard-of-care biomarker was already treated before WGS
77	Known primary tumour	Prostate		2	docetaxel; abiraterone-prednisone		1	0		0			0	0			TP53 inact mut		54	2.4		7.78645	YES			2	cabazitaxel; carboplatin-cabazitaxel	NO							No actionable standard-of-care biomarkers
78	Known primary tumour	Prostate		3	ADT; abiraterone; docetaxel		7	1		1	FGFR1 amp		0	0			AR resist mut; AR resist amp; RB1 loss; TP53 inact homoz disrup; TMPRSS2-ERG fus		59	3.2		1.90554	NO	Deceased		0		NO							Insufficient follow-up
79	Known primary tumour	Lung (NSCLC)		1	ipilimumab-nivolumab (M18BNI)		5	1		1	TML high		0	0			STK11 inact mut; FOXP1 inact mut; ARGHAP35 inact mut; MYC amp		141	9.3		24.1807	YES			1	ipilimumab-nivolumab (same; M18BNI)	NO							No actionable standard-of-care biomarkers
80	Known primary tumour	Mesothelioma		2	Mesopher (M17DNM); lenvatinib-pembrolizumab (N19PEM)		5	1		1	CDKN2A del		0	0			LATS2 inact mut; BAP1 inact part del; ARID2 del; ZFHX3 part del		36	1.6		7.55647	YES			2	pembrolizumab; gemcitabine mono	NO							No actionable standard-of-care biomarkers
81	Known primary tumour	Thyroid (Mixed papillary/anaplastic carcinoma)		0			5	1		0			1	0	BRAF V600E act mut		TP53 inact mutl; TERT act mut; TET2 mut VUS; NF2 inact par del		24	1.4		1.60986	NO	Deceased		0		NO							Insufficient follow-up
83	Known primary tumour	Uterus/endometrium		0			2	0		0			0	0			TP53 inact mut; MYC amp		77	4		-0.164271	NO	Second opinion		0		NO							No actionable biomarkers detected
84	Known primary tumour	Mesothelioma		2	cisplatin-pemetrexed (E1205); carboplatin-pemetrexed		3	1		1	CDKN2A loss		0	0			BAP1 inact mut; NF2 loss		32	1.6		12.6489	YES			1	lenvatinib-pembrolizumab (N19PEM)	NO							No actionable standard-of-care biomarkers
85	Known primary tumour	Bladder (UCC)		3	epirubicin; gemcitabine-cisplatin; pembrolizumab		4	4		3	PIK3CA act mut; CDKN2A loss; TMB high; FGFR3 act mut		0	0					148	6.3		13.5359	YES			2	paclitaxel-tremelimumab-durvalumab (ICRA); erdafitinib (early access)	YES	FGFR3	erdafinitib	Experimental trial: Early access protocol				No actionable standard-of-care biomarkers
86	Known primary tumour	Vagina (SCC)		1	carboplatin-paclitaxel		6	1		1	TMB high		0	0			STK11 loss; TERT act mut VUS; MUTYH mut VUS; TERT act amp VUS; HPV type 45		230	9.8		14.3901	YES			1	pembrolizumab (DRUP)	YES	TMB	pembrolizumab	Experimental trial	DRUP (M15DRU)		II	No actionable standard-of-care biomarkers
87	Cancer of unknown primary	CUP (Head and neck; SCC)		0			0	0		0			0	0					17	0.5		26.5462	YES			0		NO							No actionable biomarkers detected
88	Cancer of unknown primary	CUP (Definitive CUP; possibly Lung; NSCLC)		0			2	0		0			0	0			TERT mut; HPV type 16		92	4.2		16.46	YES			2	carboplatin-paclitaxel-pembrolizumab; COSTAR (Berlin)	NO							No actionable biomarkers detected
90	Cancer of unknown primary	CUP (Definitive CUP; possibly Colorectum)		1	CAPOX		3	3		2	EGFR amp; CDKN2A loss		0	1	KRAS absent		TP53 inact mut		92	6.3		2.7269	NO	Deceased		1	panitumumab (DRUP)	YES	KRAS absent	panitumumab	Reimbursed care				Treated but less than 3 months follow-up
91	Known primary tumour	Pancreas (Neuro-endocrine; NET)		0			1	0		0			0	0			APC part del		12	0.5		-0.427105	NO	Second opinion		1	carboplatin-etoposide	NO							No actionable biomarkers detected
92	Cancer of unknown primary	CUP (Definitive CUP; possibly Colorectum)		0			4	2		2	CCND1 amp; CDKN2A loss		0	0			TP53 inact mut; RSF1 amp VUS		33	1.5		1.64271	NO	Deceased		0	(panitumumab (DRUP))	NO							Insufficient follow-up
93	Known primary tumour	GIST		0			2	1		1	CDKN2A loss		0	0			MAX inact mut		20	1.3		26.5462	YES			0		NO							No actionable standard-of-care biomarkers
94	Cancer of unknown primary	CUP (Biliary tract)		0			3	2		2	FGFR2 act mut; PTEN loss		0	0			TP53 inact mut		NULL	NULL		13.0103	YES			3	cisplatin-gemcitabine; lenvatinib (DRUP); INT-1B3 (M19 INT)	YES	FGFR2	lenvatinib	Experimental trial	DRUP (M15DRU)		II	No actionable standard-of-care biomarkers
96	Known primary tumour	Oesophagus/stomach (Stomach)		1	CAPOX		3	0		0			0	0			TP53 inact mut; RHOA act mut VUS; ARID1B inact mut		21	0.8		24.6407	YES			1	paclitaxel-ramucirumab; CAPOX; carboplatin-paclitaxel	NO							No actionable standard-of-care biomarkers
97	Known primary tumour	Urothelial tract (Urethra; adenocarcinoma)		1	capecitabine		4	3		3	BRAF class III act mut; KRAS act mut; CDKN2A loss		0	0			TP53 inact mut		94	5.8		3.67967	YES			0	(carboplatin-gemcitabine)	NO							No actionable standard-of-care biomarkers
98	Known primary tumour	Soft tissue (PEComa)		1	sirolimus		4	1		1	CHEK2 inact mut		0	0			RB1 loss; TP53 loss; IRS2 amp VUS		102	6.6		12.2875	YES			3	pazopanib; olaparib (DRUP); doxorubicine	YES	CHEK2	olaparib	Experimental trial	DRUP (M15DRU)		II	No actionable standard-of-care biomarkers
99	Known primary tumour	Lung (NSCLC; sarcomatoid carcinoma)		0			5	1		1	KIT/KDR/PDGFRA coamp		0	0			TP53 inact mut; SHDB mut; RB1 loss; TERT amp		99	6.3		8.50924	YES			1	carboplatin-paclitaxel-pembrolizumab; pembrolizumab maintenance	NO							No actionable standard-of-care biomarkers
100	Known primary tumour	Lung (NSCLC)		1	osimertinib		5	4		2	HRD+BRCA2 loss; CDKN2A inact del		2	0	EGFR act mut; MET resist amp		TP53 loss		128	5.9		4.96099	YES			1	osimertinib-capmatinib; crizotinib-capmatinib	YES	MET	capmatinib	Reimbursed care				Actionable standard-of-care biomarker was treated
101	Known primary tumour	Soft tissue (Sarcoma NOS)		0			0	0		0			0	0			CDKN2A del; MDM2 amp; MYC amp; CD274 amp		68	3.9		25.7248	YES			1	doxorubicin	NO							No actionable standard-of-care biomarkers
103	Known primary tumour	Lung (NSCLC)		3	cisplatin-pemetrexed; nivolumab; cemiplimab-SAR439459 (METC18-1707); carboplatin-gemcitabine		3	2		2	SMARCA4 inact mut; TMB high		0	0			TP53 mut		636	50.7		0.262834	NO	Second opinion		0		NO							Insufficient follow-up
104	Known primary tumour	Lung (NSCLC)		3	crizotinib; lorlatinib; repotrectinib (M19TRI)		5	2		1	TMB high		1	0	ROS1 fus		ROS1 resist mut; TP53 inact mut; CDKN2A inact mut		300	13.9		24.2464	YES			2	carboplatin-pemetrexed-pembrolizumab-lorlatinib; lorlatinib retreatment	NO							Standard-of-care biomarker was already treated before WGS
106	Known primary tumour	Lung (NSCLC)		1	carboplatin-paclitaxel-pembrolizumab		4	1		1	CDKN2A del		0	0			TP53 inact mut; CDK12 inact mut; LRP1B part del VUS		92	6		1.05133	NO	Deceased		0	(lenvatinib (DRUP))	NO							Insufficient follow-up
107	Known primary tumour	Colorectum (Colon)		1	CAPOX		3	2		1	MAP2K4 inact mut		0	1	KRAS absent		TP53 inact mut; APC inact mut		109	6.5		22.9651	YES			2	CAPOX; capecitabine mono	NO							Ongoing response on previous treatment/complete remission
108	Known primary tumour	Lung (NSCLC)		1	carboplatin-pemetrexednivolumab (M17FNN)		5	2		2	KRAS act mut; TMB high		0	0			KRAS amp; STK11 inact mut; TP53 inact mut		171	10.6		1.70842	NO	Deceased		2	carboplatin-pemetrexednivolumab (M17FNN); paclitaxel-bevacizumab-nivolumablumab (M17FNN)	NO							Insufficient follow-up
109	Known primary tumour	Ovary (Transitional cell/high grade serous carcinoma)		6	carboplatin-paclitaxel; letrozole; Caelyx; carboplatin/cisplatin-cyclofosfamide; olaparib; cisplatin-gemcitabine		2	1		0			1	0	HRD+BRCA1 inact mut		TP53 inact mut		113	4.7		13.1745	YES			3	paclitaxel mono; olaparib; adriamycin	YES	HRD+BRCA1	olaparib	Reimbursed care				Actionable standard-of-care biomarker was treated
110	Known primary tumour	Lung (NSCLC)		2	CCRT; carboplatin-pemetrexed-pembrolizumab		4	2		2	CDKN2A loss; TML high		0	0			TP53 inact mut; MECOM amp VUS		155	7.3		0.919918	NO	Deceased		0		NO							Insufficient follow-up
111	Known primary tumour	Lung (NSCLC)		0			2	1		1	HRD no substrate		0	0			BAP1 loss		29	1		11.1047	YES			1	lenvatinib-pembrolizumab (N19PEM)	NO							No actionable standard-of-care biomarkers
112	Known primary tumour	Colorectum (Colon)		1	capecitabine-bevacizumab		5	0		0			0	0			PTEN inact mut VUS; APC inact mut; ERBB3 act mut VUS; FHIT part del; ERBB2 amp		52	2.1		8.87064	YES			1	capecitabine-bevacizumab retreatment	NO							No actionable standard-of-care biomarkers
113	Known primary tumour	Colorectum (Colon)		0			3	2		0			1	1	BRAF V600E act mut; KRAS absent		TP53 inact mut; STK11 del		49	2.6		24.8049	YES			4	CAPOX-B; capecitabine-bevacizumab; encorafenib-cetuximab; FOLFIRI	YES	BRAF	encorafenib-binimetinib	Reimbursed care				Actionable standard-of-care biomarker was treated
114	Known primary tumour	Lung (NSCLC)		2	carboplatin-pemetrexed-pembrolizumab; pembrolizumab mono		7	3		3	ATM inact mut; SMARCA4 loss; KRAS act mut		0	0			MDM2 amp; PIK3CA mut VUS; KEAP1 mut VUS; STK11 loss VUS		138	8.4		2.7269	NO	Deceased		1	sotorasib (compassionate use)	YES	KRAS	sotorasib	Experimental trial: Compassionate use programme				Treated but less than 3 months follow-up
115	Known primary tumour	Soft tissue (Small blue round cell tumour)		0			2	0		0			0	0			SMARCB1 inact mut VUS; CDKN2A loss VUS		26	1.4		4.53388	YES			1	doxorubicine mono	NO							No actionable standard-of-care biomarkers
116	Known primary tumour	Lung (NSCLC)		4	cisplatin-pemetrexed (NVALT-22); pemetrexed maintenance; nivolumab; sotorasib (CodeBreak 200)		2	1		1	KRAS act mut		0	0			TML high		148	9.2		8.24641	YES			1	carboplatin-pemetrexed	NO							No actionable standard-of-care biomarkers
117	Known primary tumour	Lung (NSCLC)		1	pembrolizumab mono		6	1		1	TMB high		0	0			KEAP1 inact mut; STK11 inact mut; TP53 inact mut; CDKN2A del; NTRK3 fus		252	18.3		4.56674	YES			1	carboplatin-paclitaxel	NO							No actionable standard-of-care biomarkers
120	Known primary tumour	Uterus/endometrium (Carcinosarcoma)		0			3	3		3	HRD+BRIP1 inact homoz disrup; FGFR1 amp; PTEN loss		0	0					117	5		1.87269	NO	Deceased		0		NO							Insufficient follow-up
121	Cancer of unknown primary	CUP (Definitive CUP; possibly Upper GI/pancreas)		1	carboplatin-gemcitabine		4	0		0			0	0			KRAS act mut; TP53 inact mut; AMER1 inact mut; SPTAN1 mut VUS		38	1.5		-0.328542	NO	Second opinion		0		NO							No actionable biomarkers detected
123	Known primary tumour	Lung (NSCLC)		3	CCRT; durvalumab; pembrolizumab		5	2		2	TMB high; PIK3CA amp		0	0			TP53 inact mut; KMT2D inact mut VUS; KMT2C inact mut		250	18.3		26.5462	YES			1	pembrolizumab	NO							No actionable standard-of-care biomarkers
124	Known primary tumour	Lung (NSCLC)		1	cisplatin-pemetrexed		6	2		2	TMB high; KRAS act mut;		0	0			TP53 inact mut; CDKN2A inact mut; RBM10 inact mut VUS; TERT act amp VUS		510	35.4		26.5133	YES			1	sotorasib (compassionate use)	YES	KRAS	sotorasib	Experimental trial: Compassionate use programme				No actionable standard-of-care biomarkers
126	Known primary tumour	Lung (Carcinoid; atypical carcinoid)		0			4	2		2	TMB high; MSI+MLH1 mut VUS		0	0			BRCA2 mut VUS; MDM4 amp		239	18		8.47639	YES			1	everolimus	NO							No actionable standard-of-care biomarkers
127	Known primary tumour	Lung (NSCLC)		5	durvalumab-tremulimumab; pembrolizumab; pemetrexed-pembrolizumab; dabrafenib-trametinibetinib; paclitaxel-bevacizumab		4	1		0			1	0	BRAF V600E act mut		ARID1A inact mut; TP53 inact part del; TML high		174	14.4		5.35524	YES			1	paclitaxel-bevacizumab; datopomab-deruxtecan (M20LDS)	NO							Standard-of-care biomarker was already treated before WGS
128	Known primary tumour	Cervix [previously Lung (NSCLC)]		2	carboplatin-pemetrexed-pembrolizumab; pembrolizumab maintenance		3	1		1	PTEN loss		0	0			KRAS act mut; HPV type 16		42	1.9		0.887064	NO	Second opinion		0		NO							Insufficient follow-up
131	Known primary tumour	Colorectum (Colon)		4	CAPOX-B (CAIRO 6); HIPEC; CAPOX; FOLFIRI-B		4	1		1	KRAS act mut		0	0			APC inact mut; TP53 inact mut; PALB2 mut VUS no HRD		146	6.8		26.3491	YES			1	JDQ443-TNO155 (M20JDQ)	YES	KRAS	JDQ443 (opnurasib)	Experimental trial	M20JDQ	NCT04699188	Ib/II	No actionable standard-of-care biomarkers
132	Known primary tumour	Lung (NSCLC)		3	cisplatin-pemetrexed; erlotinib; osimertinib; dabrafenib-trametinibetinib-osimertinib		4	3		2	TML high; PTEN inact		1	0	EGFR act mut				2102	80.2		22.8337	YES			1	paclitaxel-atezolizumab-bevacizumab; osimertinib retreatment; dabrafenib-trametinib	NO							Ongoing response on previous treatment/complete remission
136	Known primary tumour	Lung (NSCLC)		1	carboplatin-pemetrexed		2	0		0			0	0			BAP1 del; SETD2 inact mut		38	1.2		26.2834	YES			1	lenvatinib-pembrolizumab (N19PEM)	NO							No actionable standard-of-care biomarkers
137	Known primary tumour	Ovary (Low grade serous carcinoma)		4	carboplatin-paclitaxel; anastrozol; tamoxifen; fulvestrant (M18FUG FUCHSIA)		3	1		1	NRAS act mut		0	0			ARID1A inact aplice mut; POLE inact mut		30	1.4		0.0985626	NO	Other hospital referral		1	fulvestrant (M18FUG FUCHSIA)	NO							Insufficient follow-up
138	Known primary tumour	Ovary (Low grade serous carcinoma)		1	carboplatin-paclitaxel		1	1		1	CDKN2A loss		0	0					23	1		10.0534	YES			1	letrozole	NO							No actionable standard-of-care biomarkers
140	Known primary tumour	Lung (NSCLC)		1	tepotinib (M18TEP)		4	1		0			1	0	MET exon 14 skipping		MET resist mut; SETD2 inact mut VUS; MDM2 amp		22	0.7		3.25257	YES			1	pembrolizumab	NO							Standard-of-care biomarker was already treated before WGS
141	Known primary tumour	Lung (Carcinoid; atypical carcinoid)		1	everolimus		0	0		0			0	0					32	1.1		12.8131	YES			2	capecitabine-temozolomide; carboplatin-paclitaxel-atezolizumab-bevacizumab	NO							No actionable standard-of-care biomarkers
142	Known primary tumour	Oesophagus/stomach (GEJ; adenocarcinoma)		1	CAPOX		6	1		1	CCND3 amp		0	0			TP53 inact mut; KRAS amp; CDKN2A inact del; SLCO1B1 amp VUS		70	3.6		20.3696	YES			2	CAPOX; paclitaxel-ramucirumab	NO							No actionable standard-of-care biomarkers
143	Known primary tumour	Colorectum (Rectum)		1	FUDR/FOLFOX		4	2		1	PIK3CA act mut		0	1	KRAS absent		APC inact mut; TP53 inact mut; SMAD4 mut VUS		87	4.6		26.3491	YES			2	FUDR; CCRT capecitabine	NO							Ongoing response on previous treatment/complete remission
144	Known primary tumour	Lung (NSCLC)		2	cisplatin-pemetrexed; nivolumab		4	2		2	TML high; KRAS act mut		0	0			KEAP inact mut; STK11 inact mut		416	26.4		5.78234	YES			1	sorotasib	YES	KRAS	sotorasib	Experimental trial: Compassionate use programme				No actionable standard-of-care biomarkers
145	Known primary tumour	Oesophagus/stomach (Stomach; adenocarcinoma/sarcomatoid carcinoma)		1	FLOT		3	2		2	TMB high; CDKN2A del		0	0			TP53 inact mut		216	19.6		22.7023	YES			0		NO							No actionable standard-of-care biomarkers
149	Known primary tumour	Lung (NSCLC)		1	cisplatin-pemetrexed		7	1		1	TML high		0	0			STK11 inact mut VUS; TP53 inact mut; FAT4 inact mut VUS; FOXA1 amp; MYC amp; TG amp		251	13.6		1.18275	NO	Second opinion		0		NO							Insufficient follow-up
150	Known primary tumour	Colorectum (Rectum)		0			5	3		2	PIK3CA act mut; FLT3 amp		1	0	KRAS present		SMAD4 inact mut; TP53 splice mut		116	8.1		10.7762	YES			2	CAPOX; FOLFIRI	YES	KRAS present	no EGFR inhibitor	Reimbursed care				Actionable standard-of-care biomarker was treated
153	Known primary tumour	Breast (ER positive, Her2 negative)		5	TAC; tamoxifen; letrozol; capecitabine-vinorelbine-letrozol; fulvestrant-palbociclib		3	2		1	CCND1 amp		1	0	PIK3CA act mut		PIK3CA amp; TP53 inact mut		84	4.7		11.3018	YES			3	paclitaxel; alpelisib-fulvestrant; adriamycine	YES	PIK3CA	alpelisib	Reimbursed care				Actionable standard-of-care biomarker was treated
154	Known primary tumour	Lung (NSCLC)		4	pembrolizumab; cisplatin/carboplatin-pemetrexed; pemetrexed mono; pembrolizumab retreatment		5	2		2	TMB high; KRAS act mut		0	0			TP53 inact mut; MYC amp VUS; CCNE1 amp VUS		364	25.3		5.4538	YES			1	sotorasib (compassionate use)	YES	KRAS	sotorasib	Experimental trial: Compassionate use programme				No actionable standard-of-care biomarkers
155	Cancer of unknown primary	CUP (Oesophagus/stomach; Stomach; signet ring)		1	ECC		3	0		0			0	0			CDH1 inact mut; RHOA mut VUS; ITGAV del VUS		115	6.8		1.1499	NO	Deceased		0		NO							No actionable biomarkers detected
156	Cancer of unknown primary	CUP (Lung; NSCLC)		0			5	1		1	KRAS act mut		0	0			TP53 inact mut; TERTp act mut; CDKN2A inact; TMB high		140	10		0.0985626	NO	Other hospital referral		0		NO							Insufficient follow-up
157	Known primary tumour	Lung (NSCLC)		1	erlotinib		4	1		0			1	0	EGFR act mut		EGFR resist mut; EGFR amp; TP53 inact mut		44	2.5		25.6263	YES			1	osimertinib	YES	EGFR	osimertinib	Reimbursed care				Actionable standard-of-care biomarker was treated
158	Known primary tumour	Soft tissue (Epidemic Kaposisarcoma)		4	Peg-interferon; Caelyx; paclitaxel; etoposide		2	1		1	HRD no substrate		0	0			RAD54L mut VUS		40	2		0.295688	NO	Other hospital referral		1	pazopanib	NO							Insufficient follow-up
159	Known primary tumour	Lung (NSCLC)		2	osimertinib; T-DM1-osimertinib		7	1		0			1	0	EGFR act mut		EGFR T790M resist mut; TP53 mut; PTEN mut; RB1 mut; ATM mut VUS; TMB high; APOBEC signature		271	11.8		25.5606	YES			6	carboplatin-paclitaxel-atezolizumab-bevacizumab; carboplatin-paclitaxel; osimertinib retreatment; carboplatin-pemetrexedosi; pemetrexed-osimertinib; paclitaxel-bevacizumab-osimertinib	NO							Standard-of-care biomarker was already treated before WGS
160	Known primary tumour	Thymus		2	cisplatin-etoposide; carboplatin-pemetrexed		0	0		0			0	0					10	0.4		24.6407	YES			0		NO							No actionable standard-of-care biomarkers
161	Known primary tumour	Breast (TNBC)		4	ddAC; carboplatin-paclitaxel; ddAC retreatment; capecitabine		7	1		1	HRD no substrate		0	0			TP53 inact mut; CIC del VUS; ERG del VUS; KDM6A del VUS; RB1 inact homoz disrup; MGA inact homoz disrup		98	4.8		3.02259	YES			1	nivolumab (N19TON)	NO							No actionable standard-of-care biomarkers
162	Known primary tumour	Lung (NSCLC)		2	erlotinib; osimertinib		4	1		0			1	0	EGFR exon 19 del		EGFR T790M resist mut; EGFR gain; CDKN2A loss		42	2		23.7864	YES			2	BLU-945 (M19BLU); osimertinib retreatment	NO							Standard-of-care biomarker was already treated before WGS
163	Known primary tumour	Brain/CNS (Olfactory neuroblastoma)		0			0	0		0			0	0					20	1		23.0965	YES			0		NO							No actionable standard-of-care biomarkers
164	Known primary tumour	Lung (NSCLC)		2	pembrolizumab; carboplatin-pemetrexed		4	2		2	TMB high; KRAS act mut		0	0					283	19.1		3.05544	YES			1	sotorasib	YES	KRAS	sotorasib	Experimental trial: Compassionate use programme				No actionable standard-of-care biomarkers
167	Known primary tumour	Melanoma		0			5	3		2	TMB high; PTEN inact mut		1	0	BRAF V600E act mut		TERT mut VUS; CDKN2A inact mut		814	59.4		0.788501	NO	Deceased		1	dabrafenib-trametinib	YES	BRAF	dabrafenib-trametinibetinib	Reimbursed care				Treated but less than 3 months follow-up
168	Known primary tumour	Prostate		6	ADT; bicalutamide; enzalutamide; docetaxel; cabazitaxel; cabazitaxel-carboplatin		5	1		1	PTEN inact del		0	0			TP53 inact mut; CDKN2A loss; AR amp; TMPRSS2-ERG fus		35	2.2		10.4148	YES			2	cabazitaxel; alpelisib (DRUP)	YES	PTEN	alpelisib	Experimental trial	DRUP (M15DRU)		II	No actionable standard-of-care biomarkers
172	Known primary tumour	Lung (NSCLC)		2	erlotinib; osimertinib		5	1		0			1	0	EGFR act mut		TP53 inact mut; RSF1 amp VUS; MTOR amp; MDM4 amp		65	3.7		25.9877	YES			2	carboplatin-pemetrexed-osimertinib; paclitaxel-bevacizumab-osimertinib	NO							Standard-of-care biomarker was already treated before WGS
173	Known primary tumour	Oesophagus/stomach (GEJ; adenocarcinoma)		1	carboplatin-paclitaxel		4	2		1	TMB high		1	0	ERBB2 amp		FGFR2 amp; TP53 inact mut		255	16.5		19.1211	YES			1	CAPOX-trastuzumab	YES	ERBB2	trastuzumab	Reimbursed care				Actionable standard-of-care biomarker was treated
174	Known primary tumour	GIST (Quadruple wildtype)		0			2	2		2	NF1 inact mut; PIK3CA act mut		0	0					30	1.7		25.3306	YES			0		NO							No actionable standard-of-care biomarkers
175	Known primary tumour	Lung (Carcinoid; atypical carcinoid)		1	dabrafenib-trametinibetinib		4	2		1	PTEN inact mut		1	0	BRAF V600E act mut		BRAF resist indel; CDKN2A del		35	2.3		1.31417	NO	Deceased		2	dabrafenib; carboplatin-paclitaxel-pembrolizumab	YES	BRAF	darafenib	Reimbursed care				Treated but less than 3 months follow-up
176	Known primary tumour	Mesothelioma		3	cisplatin-pemetrexed; DENIM; lurbinectedin		0	0		0			0	0					32	1.2		21.8152	YES			1	lenvatinib-pembrolizumab (N19PEM)	NO							No actionable standard-of-care biomarkers
177	Cancer of unknown primary	CUP (Bladder; UCC)		0			5	1		1	TML high		0	0			DDR2 amp; MDM2 amp; CDKN2A del; TERTp act mut		260	12.4		9.56057	YES			2	gemcitabine-cisplatin; pembrolizumab	NO							No actionable standard-of-care biomarkers
178	Known primary tumour	Lung (NSCLC)		2	alectinib; lorlatinib		3	1		0			1	0	ALK fus		CDKN2A inact mut; AR mut VUS		NULL	NULL		11.8604	YES			3	carboplatin-paclitaxel-atezolizumab-bevacizumab; lorlatinib retreatment; datopotamab-deruxtecan (M20LDS)	NO							Standard-of-care biomarker was already treated before WGS
179	Cancer of unknown primary	CUP (Lung; NSCLC)		1	carboplatin-pemetrexed-pembrolizumab		1	1		0			1	0	EGFR exon 19 del				12	0.4		0.164271	NO	Second opinion		1	carboplatin-pemetrexed-pembrolizumab	NO							Insufficient follow-up
182	Known primary tumour	Lung (NSCLC)		4	cisplatin-pemetrexed; nivolumab; carboplatin-pemetrexed; pemetrexed maintenance		2	0		0			0	0			KRAS act mut; NOTCH1 inact mut VUS		80	3.5		11.499	YES			1	paclitaxel-bevacizumab	NO							No actionable standard-of-care biomarkers
183	Known primary tumour	Mesothelioma		1	DENIM		2	0		0			0	0			CDKN2A del; NF2 del		23	0.8		17.4456	YES			1	lenvatinib-pembrolizumab (N19PEM)	NO							No actionable standard-of-care biomarkers
184	Known primary tumour	Mesothelioma		2	cisplatin-pemetrexed; carboplatin-pemetrexed		1	0		0			0	0			BAP1 del		21	0.9		25.2977	YES			1	lenvatinib-pembrolizumab (N19PEM)	NO							No actionable standard-of-care biomarkers
185	Cancer of unknown primary	CUP (Head and neck; SCC)		0			6	2		2	TMB high; CCDN1 amp		0	0			TP53 inact mut; CDKN2A inact mut; FGF3 coamp; AKT1 amp		341	22		24.6407	YES			0		NO							No actionable standard-of-care biomarkers
188	Known primary tumour	Breast (ER positive, Her2 positive)		0			4	1		1	PIK3CA act mut		0	0			CDH1 inact mut; SMAD4 inact mut; TP53 inact mut		90	3.9		1.577	NO	Second opinion		0		NO							Insufficient follow-up
189	Known primary tumour	Mesothelioma		1	carboplatin-pemetrexed		2	0		0			0	0			CDKN2A inact		20	1		7.32649	YES			1	lenvatinib-pembrolizumab (N19PEM)	NO							No actionable standard-of-care biomarkers
190	Known primary tumour	Mesothelioma		1	cisplatin-pemetrexed		2	0		0			0	0			CDKN2A del; FAT1 del		27	1.4		10.7105	YES			2	lenvatinib-pembrolizumab (N19PEM); lenvatinib mono	NO							No actionable standard-of-care biomarkers
191	Known primary tumour	Lung (NSCLC)		2	erlotinib; osimertinib		6	2		1	NRAS act mut		1	0	EGFR act mut		TP53 inact mut; RB1 inact mut; CCNE1 amp VUS; NTRK1 amp		131	6		24.4107	YES			6	dabrafenib-trametinibetinib-osimertinib; carboplatin-pemetrexedosi; carboplatin-osimertinib; patritumab-deruxtecan (M19UNS); paclitaxel-bevacizumab-osimertinib; atezolizumab-bevacizumab	YES	NRAS+EGFR	dabrafenib-trametinibetinib-osimertinib	Experimental trial	OSIRIS (M18OSI)		N/A	Study treatment for standard-of-care biomarker
193	Known primary tumour	Breast (ER positive, Her2 negative)		3	AI+CDK4/6 inhibitor; exemestane-everolimus; capecitabine		3	2		1	CCND1 amp		1	0	PIK3CA act mut		ESR1 resist mut		16	0.7		-2.7269	NO	Second opinion		0		NO							Insufficient follow-up
194	Known primary tumour	Breast (ER positive, Her2 negative)		3	ddAC; paclitaxel; letrozol; fulvestrant-palbociclib		4	2		1	CCND1 amp		1	0	PIK3CA act mut		ERBB3 act mut VUS; CDH1 inact mut		25	1.1		25.3306	YES			1	fulvestrant-alpelisib	YES	PIK3CA	alpelisib	Reimbursed care				Actionable standard-of-care biomarker was treated
195	Known primary tumour	Mesothelioma		1	(BSC in DENIM)		2	0		0			0	0			CDKN2A del; NF2 inact homoz disrup		19	1.1		22.2423	YES			2	lenvatinib-pembrolizumab (N19PEM PEMMELA), carboplatin-pemetrexed	NO							No actionable standard-of-care biomarkers
200	Known primary tumour	Mesothelioma		2	cisplatin-pemetrexed; gemcitabine		4	1		1	NF2 inact mut		0	0			STK11 inact mut; NTRK1 amp; CDKN2A loss		28	1.5		3.38398	YES			1	lenvatinib-pembrolizumab (N19PEM PEMMELA)	NO							No actionable standard-of-care biomarkers
201	Known primary tumour	Oesophagus/stomach (Stomach)		1	FOLFOX		4	1		1	MET amp		0	0			CDK1 inact mut; TP53 inact mut; CDKN2A del		13	0.7		4.76386	YES			3	FOLFOX (same); crizotinib (DRUP); paclitaxel	YES	MET	crizotinib	Experimental trial	DRUP (M15DRU)		II	No actionable standard-of-care biomarkers
202	Known primary tumour	Lung (NSCLC)		1	erlotinib		3	1		0			1	0	EGFR exon 19 del		EGFR T790M resist mut; TP53 inact homoz disrup		117	7.6		21.8809	YES			2	osimertinib; afatinib	YES	EGFR	afatinib	Reimbursed care				Actionable standard-of-care biomarker was treated
203	Known primary tumour	Ovary (High grade serous carcinoma)		0			7	1		1	KRAS amp		0	0			TP53 inact mut; RSF1 resist amp; PIM1 am[; MYC amp; CCNE1 amp; ARAF amp		46	3		21.8809	YES			1	carboplatin-paclitaxel	NO							No actionable standard-of-care biomarkers
204	Known primary tumour	Lung (NSCLC)		5	cisplatin-vinorelbine; carboplatin-nab-paclitaxel; carboplatin-pemetrexed-pembrolizumab; cisplatin-etoposide; pembrolizumab-etoposide		5	1		1	TMB high		0	0			KRAS act mut; STK11 inact mut; KEAP1 inact del		261	16.3		3.61396	YES			0		NO							No actionable standard-of-care biomarkers
205	Cancer of unknown primary	CUP (Definitive CUP; possibly Ovary; mucinous adenocarcinoma)		2	carboplatin-paclitaxel; capecitabine		2	1		1	KRAS act mut		0	0			TP53 inact mut		90	5.9		1.60986	NO	Deceased		0		NO							Insufficient follow-up
206	Known primary tumour	Lung (Carcinoid; atypical carcinoid)		2	capecitabine-temozolomide; everolimus		1	0		0			0	0			MEN1 inact del		16	1.4		4.6653	YES			0		NO							No actionable standard-of-care biomarkers
209	Known primary tumour	Lung (NSCLC)		2	cisplatin, durvalumab		3	1		1	KRAS act mut		0	0			TP53 inact homoz disrup; STK11 inact mut		37	2.6		3.12115	YES			0		NO							No actionable standard-of-care biomarkers
210	Known primary tumour	Lung (Carcinoid; atypical carcinoid)		1	capecitabine-temozolomide		0	0		0			0	0					14	1		7.26078	YES			0		NO							No actionable standard-of-care biomarkers
211	Cancer of unknown primary	CUP (Definitive CUP; possibly Lung; NSCLC)		1	carboplatin-pemetrexed-pembrolizumab		4	1		1	NRAS act mut		0	0			APC del; TP53 inact mut; ARID1A inact mut		31	2.2		0.229979	NO	Deceased		0		NO							Insufficient follow-up
215	Known primary tumour	Bone (Osteosarcoma)		0			2	0		0			0	0			NF1 inact mut; TSC2 mut VUS		30	1.8		22.2094	YES			2	(neo-adjuvant therapy; adjuvant therapy)	NO							No actionable standard-of-care biomarkers
216	Known primary tumour	Prostate		5	Casodex; abiraterone-prednison; docetaxel-prednison; enzalutamide; cabazitaxel		6	1		1	ATM inact mut		0	0			MSH2 mut; MYC amp; AR amp; TMPRSS2-ERG fus; TP53 loss		49	3.3		0.722793	NO	Second opinion		1	carboplatin mono	NO							Insufficient follow-up
217	Known primary tumour	Soft tissue (High grade pleomorphic sarcoma)		0			2	1		1	PTEN del		0	0			TP53 inact mut		33	2.1		2.79261	NO	Deceased		1	dacarbazine	NO							Insufficient follow-up
218	Known primary tumour	Lung (NSCLC)		1	encorabenib-binimetinib (M19EBL)		3	2		1	HRD no substrate		1	0	BRAF V600E act mut		TP53 inact del; ARID1A inact mut		70	2.7		3.77823	YES			1	encorafenib-binimetinib (same; M19EBL)	NO							Low performance status
219	Cancer of unknown primary	CUP (Lung; NSCLC)		0			5	2		2	TMB high; CCND3 amp		0	0			ARID1A inact; STK11 inact; KEAP1 inact; TP53 inact; CHEK2 inact; ARID2 inact; CCNE1 amp VUS		267	19.4		1.9384	NO	Deceased		1	carboplatin-pemetrexed-pembrolizumab	NO							Insufficient follow-up
220	Known primary tumour	Mesothelioma		2	carboplatin-pemetrexed; gemcitabine		1	0		0			0	0			CDKN2A del		33	1.5		6.17659	YES			1	lenvatinib-pembrolizumab (N19PEM PEMMELA)	NO							No actionable standard-of-care biomarkers
221	Known primary tumour	Melanoma		0			6	2		2	KIT act mut; TMB high		0	0			NF1 inact mut; TERT amp VUS; CDKN2A inact homoz disrup; UV signature		183	13		21.8152	YES			1	nivolumab+BMS-986016 (M16LAG)	NO							No actionable standard-of-care biomarkers
222	Known primary tumour	Soft tissue (Clear cell sarcoma)		1	doxorubicine-ifosfamide		1	0		0			0	0			EWSR1-CREB1 fus		20	0.9		22.0452	YES			1	pazopanib	NO							No actionable standard-of-care biomarkers
223	Known primary tumour	Colorectum (Rectum)		0			3	2		1	KRAS act mut		1	0	KRAS present		APC inact mut; TP53 inact mut		118	6.7		22.0452	YES			1	CAPOX	YES	KRAS present	no EGFR inhibitor	Reimbursed care				Actionable standard-of-care biomarker was treated
224	Known primary tumour	Prostate		1	LHRH		1	0		0			0	0			TP53 inact mut		64	3.5		16.7228	YES			1	abiraterone-prednison	NO							No actionable standard-of-care biomarkers
225	Known primary tumour	Lung (NSCLC)		6	gefitinib; carboplatin-pemetrexed; afatinib; carboplatin-paclitaxel-atezolizumab-bevacizumab; afatinib retreatment; osimertinib		5	2		0			2	0	MET resist amp; EGFR act mut		MYC amp; TERT amp; MDM2 amp		114	4.9		13.4045	YES			2	capmatinib; osimertinib retreatment	YES	MET	capmatinib	Reimbursed care				Actionable standard-of-care biomarker was treated
227	Cancer of unknown primary	CUP (Definitive CUP; possibly Head and neck; SCC)		0			1	0		0			0	0			RHOA act mut VUS		6	0.3		7.35934	YES			0		NO							No actionable biomarkers detected
228	Known primary tumour	Prostate		2	docetaxel; abirateron-prednison		4	2		1	PTEN inact mut		1	0	BRAF act indel		TP53 inact mut; CDKN2A loss		43	2.6		8.31211	YES			2	cabazitaxel; carboplatin-cabazitaxel	NO							Standard-of-care biomarker was already treated before WGS
229	Known primary tumour	Lung (LCNEC)		0			4	1		1	TML high		0	0			NF1 inact splice mut; Rb1 inact mut; TP53 inact mut		147	9.6		10.152	YES			1	carboplatin-paclitaxel-atezolizumab-bevacizumab	NO							No actionable standard-of-care biomarkers
230	Known primary tumour	Prostate		4	docetaxel; enzalutamide-denosumab; docetaxel-pembrolizumab/placebo (M19KNT); cabazitaxel		5	1		1	PTEN loss		0	0			MGMT mut VUS; CDH1 inact part loss; TP53 inact part loss; AR amp		59	3.9		6.6694	YES			0		NO							No actionable standard-of-care biomarkers
231	Known primary tumour	Lung (NSCLC)		3	crizotinib; alectinib; brigatinib		2	1		0			1	0	ALK fus		ALK resist mut; CDKN2A inact del		34	1.7		23.1951	YES			4	lorlatinib; carboplatin-pemetrexed; pemetrexed mono; paclitaxel-bevacizumab	YES	ALK	lorlatinib	Reimbursed care				Actionable standard-of-care biomarker was treated
232	Known primary tumour	Colorectum (Rectum)		0			3	1		0			0	1	KRAS absent		KRAS act mut; APC inact mut; TP53 inact mut		69	4		0.459959	NO	Deceased		0		NO							Insufficient follow-up
233	Known primary tumour	Colorectum (Colon)		1	CAPOX		3	1		0			0	1	KRAS absent		APC inact mut; TP53 inact splice mut; SMAD4 inact mut		85	5.3		21.1253	YES			4	CAPOX (same); capecitabine; FOLFOX; capecitabine-bevacizumab	NO							Standard-of-care biomarker was already treated before WGS
234	Cancer of unknown primary	CUP (Definitive CUP; possibly Cervix; SCC)		0			4	0		0			0	0			HPV type 16; CREBBP inact mut; STK11 inact mut; EZH2 mut VUS		105	4.2		1.60986	NO	Second opinion		0		NO							No actionable biomarkers detected
235	Known primary tumour	Bladder (UCC)		1	M-VAC		4	1		1	CCND1 amp		0	0			FGFR3 amp; CDKN2A loss; TP53 inact mut		117	5.2		6.14374	YES			0		NO							No actionable standard-of-care biomarkers
236	Known primary tumour	Thymus		1	cisplatin-etoposide		0	0		0			0	0					0	0		21.6509	YES			0		NO							No actionable standard-of-care biomarkers
237	Cancer of unknown primary	CUP (Definitive CUP; possibly Upper GI)		0			2	0		0			0	0			KRAS amp; TP53 inact mut		139	9		4.79671	YES			1	CAPOX	NO							No actionable biomarkers detected
238	Known primary tumour	Lung (NSCLC)		8	erlotinib; rocletinib; osimertinib; carboplatin-pemetrexed; osimertinib retreatment; trastuzumab emtansine-osimertinib (M18TEO); U3-1402 (M19UNS); osimertinib retreatment		2	1		1	TML high		0	0			TP53 inact mut		158	8.7		10.3491	YES			2	paclitaxel-bevacizumab-osimertinib; osimertinib mono	NO							No actionable standard-of-care biomarkers
242	Known primary tumour	Lung (NSCLC)		2	carboplatin-pemetrexed-pembrolizumab; pembrolizumab mono, sotorasib/AMG 510 (CodeBreak 200)		5	2		2	TMB high; KRAS act mut		0	0			KRAS amp; CDKN2A loss; STK11 part loss		319	20		4.50103	YES			0		NO							No actionable standard-of-care biomarkers
243	Known primary tumour	Lung (NSCLC)		2	carboplatin-etoposide; durvalumab		2	0		0			0	0			TP53 inact mut; CDKN2A inact mut		100	7.5		0.0328542	NO	Second opinion		0		NO							No actionable biomarkers detected
244	Known primary tumour	Lung (NSCLC)		4	erlotinib; carboplatin-pemetrexed; pemetrexed mono; erlotinib retreatment		2	2		1	EGFR act mut		1	0	EGFR act mut		CDKN2A loss		77	4.3		20.8953	YES			1	erlotinib retreatment; patritumab-deruxtecan (M20HRT)	YES	EGFR	erlotinib	Reimbursed care				Actionable standard-of-care biomarker was treated
249	Cancer of unknown primary	CUP (Definitive CUP; possibly Upper GI)		0			4	0		0			0	0			KRAS act mut; TP53 inact mut; CDKN2A inact mut; PRKAR1A inact mut VUS		21	1.1		0.361396	NO	Second opinion		0		NO							No actionable biomarkers detected
251	Cancer of unknown primary	CUP (Lung; NSCLC)		0			4	2		2	BRAF class III act mut; PTEN inact mut		0	0			TP53 inact mut; STK11 inact mut		228	12.6		10.5462	YES			1	carboplatin-pemetrexed-pembrolizumab	NO							No actionable standard-of-care biomarkers
253	Known primary tumour	Ovary		1	carboplatin-paclitaxel		3	1		1	NRG1 fus		0	0			TP53 inact mut; CCNE1 amp		45	2.3		2.82546	NO	Deceased		0		NO							Insufficient follow-up
254	Known primary tumour	Prostate		3	docetaxel; abirateron-prednison (OSTRICH); cabazitaxel		5	1		0			1	0	HRD+RAD51B inact mut		AR resist inact mut; AR gain; TP53 inact splice mut; TMPRSS2-ERG transloc		101	5.4		8.41068	YES			0		NO							Ongoing response on previous treatment/complete remission
255	Known primary tumour	Mesothelioma		2	carboplatin-pemetrexed; dendritic cells (DENIM)		2	1		1	HRD+BRCA2 inact mut		0	0			CDKN2A loss		53	2.5		6.40657	YES			1	lenvatinib-pembrolizumab (N19PEM PEMMELA)	NO							No actionable standard-of-care biomarkers
256	Cancer of unknown primary	CUP (Lung; NSCLC)		1	crizotinib (C15MET)		7	2		2	TML high		0	0			AKT1 amp; TP53 inact mut; STK11 inact mut; KEAP1 inact mut; CDKN2A del; SMARCA4 del		199	6.6		0.0328542	NO	Deceased		0		NO							Insufficient follow-up
257	Known primary tumour	Mesothelioma		3	pembrolizumab-lenvatinib; gemcitabine; carboplatin-pemetrexed		3	0		0			0	0			BAP1 inact mut; LATS2 inact mut VUS; DDX3X part del VUS		27	1.2		6.63655	YES			1	gemcitabine mono	NO							No actionable standard-of-care biomarkers
259	Known primary tumour	Lung (Carcinoid; typical carcinoid)		0			0	0		0			0	0					23	1.1		7.58932	YES			1	capecitabine-temozolomide	NO							No actionable standard-of-care biomarkers
260	Cancer of unknown primary	CUP (Ovary)		0			3	1		0			1	0	HRD+BRCA1 inact mut		TP53 inact mut; MYC amp		84	3.7		0.591376	NO	Deceased		0		NO							Insufficient follow-up
261	Known primary tumour	Ovary (High grade serous carcinoma)		2	cisplatin-paclitaxel; carboplatin-paclitaxel		4	1		1	MAP2K4 part loss		0	0			TP53 inact mut; MDM2 amp; CCNE1 amp		64	3.9		20.8624	YES			0		NO							No actionable standard-of-care biomarkers
262	Known primary tumour	Lung (NSCLC)		1	encorafenib-binimetinib (M19EBL)		5	2		1	TML high		1	0	BRAF V600E act mut		SMAD4 inact mut; PTPRD inact part del; SETD2 inact mut		315	10.2		21.3881	YES			2	carboplatin-pemetrexednivo (M17FNN); nivolumab mono	YES	TML	nivolumab	Experimental trial	M17FNN	NCT05742607	Ib/II	Standard-of-care biomarker was already treated before WGS
263	Known primary tumour	Breast (ER positive, Her2 negative)		3	4x ddAC + 9x paclitaxel; tamoxifen; capecitabine-vinorelbine		4	2		2	AKT1 act mut; TMB high		0	0			TP53 inact mut; CDKN2A del		185	7.7		5.38809	YES			1	pembrolizumab (DRUP)	YES	TMB	pembrolizumab	Experimental trial	DRUP (M15DRU)		II	No actionable standard-of-care biomarkers
266	Cancer of unknown primary	CUP (Skin adnex)		0			6	1		1	TML high		0	0			BAP1 inact mut; NOTCH1 inact mut; TP53 inact mut; MYCN amp; RB1 loss		515	31.7		21.4867	YES			1	ipilimumab-nivolumab (DRUP)	YES	TML	ipilimumab-nivolumablumab	Experimental trial	DRUP (M15DRU)		II	No actionable standard-of-care biomarkers
267	Known primary tumour	Breast (TNBC)		3	ddAC + paclitaxel; tamoxifen; capecitabine		2	1		1	HRD no substrate		0	0			TP53 inact mut		93	5		20.4353	YES			4	cisplatin-nivolumablumab (N19TON); capecitabine; sacituzumab; GSK3745417 (M18GSK)	NO							No actionable standard-of-care biomarkers
268	Cancer of unknown primary	CUP (Breast; TNBC)		0			4	2		2	HRD no substrate; TML high		0	0			TP53 inact mut; MYC amp		151	7.4		10.8419	YES			1	4x ddAC; carboplatin-paclitaxel; capecitabine	NO							No actionable standard-of-care biomarkers
269	Known primary tumour	Prostate		5	Casodex-tamoxifen; Zoladex; abiraterone; docetaxel; cabazitaxel		8	2		2	PTEN loss; CCND1 amp		0	0			TMPRSS2-ERG fus; AR gain; TP53 loss; ALB gain; FGF3 gain; PPP2R3B loss		32	1.3		6.04517	YES			2	carboplatin-cabazitaxel; carboplatin mono	NO							No actionable standard-of-care biomarkers
271	Known primary tumour	Breast (ER positive, Her2 negative)		5	tamoxifen; letrozol-palbociclib; capecitabine-denosumab; Caelyx; paclitaxel		3	1		1	CCND1 amp		0	0			GATA3 inact mut; FGF3 amp; CHEK2 VUS		86	4.3		3.154	YES			1	eribuline	NO							No actionable standard-of-care biomarkers
272	Cancer of unknown primary	CUP (Skin; Merkel cell carcinoma)		0			2	0		0			0	0			Merkel cell polyomavirus; RB1 inact mut		5	0.3		20.7967	YES			2	cisplatin-etoposide; avelumab	NO							No actionable biomarkers detected
273	Known primary tumour	Breast (TNBC) [previously Lung (SCLC)]		0			2	0		0			0	0			MAX loss; NCOR1 inact mut VUS; RB1 inact; FOXO3 inact		58	2.3		4.07392	YES			0		NO							No actionable standard-of-care biomarkers
274	Known primary tumour	Lung (NSCLC)		3	crizotinib (DRUP); carboplatin-pemetrexed-pembrolizumab; paclitaxel-bevacizumabcizumab		9	2		1	TML high		1	0	MET exon 14 splice mut		POT1 mut VUS; CDKN2A full loss; CCND1 full gain; FGF3 full gain; IKBKB fain; ANK1 gain; GTF2I gain		308	21.9		15.0144	YES			0		NO							Low performance status
275	Known primary tumour	Lung (NSCLC)		1	osimertinib		5	3		2	CHEK2 inact mut; PIK3CA act mut		1	0	EGFR act mut		TP53 inact mut; TERT amp		93	4.8		0.229979	NO	Other hospital referral		0		NO							Insufficient follow-up
277	Known primary tumour	Mesothelioma		1	carboplatin-pemetrexed		3	0		0			0	0			BAP1 inact splice mut; RAD51C no HRD; NF2 inact mut		25	1.5		13.6016	YES			1	pembrolizumab-lenvatinib (N19PEM)	NO							No actionable standard-of-care biomarkers
278	Known primary tumour	Uterus/endometrium		2	carboplatin-paclitaxel; letrozol;		3	1		1	PIK3R1 inact mut		0	0			TP53 inact mut; NF2 inact del		103	5.1		21.3881	YES			0		NO							No actionable standard-of-care biomarkers
282	Known primary tumour	Soft tissue (Alveolar soft part sarcoma)		0			1	0		0			0	0			ASPSCR1-THE3 fus		8	0.7		8.83778	YES			2	pazopanib; atezolizumab	NO							No actionable standard-of-care biomarkers
283	Cancer of unknown primary	CUP (Definitive CUP; possibly Lung; NSCLC; carcinosarcoma)		0			0	0		0			0	0			CDKN2A loss; ARID1A inact mut		21	4.1		0.657084	NO	Second opinion		0		NO							No actionable biomarkers detected
284	Cancer of unknown primary	CUP (Pancreas)		0			5	0		0			0	0			BRAF act mut; CDKN2A inact mut; TP53 inact splice mut; RNF43 mut VUS; MYC amp		35	1.9		0.0328542	NO	Second opinion		0		NO							No actionable biomarkers detected
285	Known primary tumour	Melanoma		1	ipilimumab-nivolumab		4	2		1	TML high		1	0	BRAF act mut; TML high		TERTp mut; UV signature		2908	199.4		0.229979	NO	Other hospital referral		1	ipilimumab-nivolumab (same)	NO							Insufficient follow-up
286	Known primary tumour	Mesothelioma		1	gemcitabine (NVALT19)		1	0		0			0	0			BAP1 loss		42	1.5		8.77207	YES			1	lenvatinib-pembrolizumab (N19PEM PEMMELA)	NO							No actionable standard-of-care biomarkers
290	Known primary tumour	Lung (NSCLC)		1	osimertinib		4	2		0			2	0	RET fus; EGFR act mut		RB1 inact mut; TP53 inact mut		63	2.8		5.15811	YES			1	osimertinib-selpercatinib (ORCHARD)	YES	RET+EGFR	selpercatinib+osimertinib	Reimbursed care				Actionable standard-of-care biomarker was treated
291	Known primary tumour	Lung (NSCLC)		8	erlotinib; osimertinib; crizotinib; osimertinib retreatment; crizotinib retreatment; osimertinib retreatment; capmatinib		8	2		1	TML high		1	0	EGFR act mut		TP53 inact mut; MAP2K7 inact splice mut VUS; PIK3CA act mut; MGA inact mut VUS;		207	10.9		0.295688	NO	Deceased		0		NO							Insufficient follow-up
292	Known primary tumour	Lung (NSCLC)		0			0	0		0			0	0					5	0.4		16.0329	YES			1	carboplatin-pemetrexed-pembrolizumab	NO							No actionable standard-of-care biomarkers
293	Known primary tumour	Lung (NSCLC)		2	cisplatin-pemetrexed-pembrolizumab; pemetrexed-pembrolizumab maintenance		0	0		0			0	0					117	5.9		0.295688	NO	Second opinion		0		NO							No actionable biomarkers detected
294	Known primary tumour	Lung (LCNEC)		2	carboplatin-paclitaxel-atezolizumab-bevacizumab; carboplatin-gemcitabine		2	1		1	TMB high		0	0			TP53 part del		216	17.3		3.58111	YES			1	paclitaxel-bevacizumab	NO							No actionable standard-of-care biomarkers
296	Known primary tumour	Bladder (UCC)		2	cisplatin-etoposide; carboplatin-etoposide		1	1		1	TMB high		0	0					555	22		20.961	YES			1	ipilimumab-nivolumab (DRUP)	YES	TMB	ipilimumab-nivolumablumab	Experimental trial	DRUP (M15DRU)		II	No actionable standard-of-care biomarkers
297	Cancer of unknown primary	CUP (Oesophagus/stomach)		0			3	1		1	TMB high		0	0			TP53 inact mut; ARID1A inact mut		160	20.9		-0.295688	NO	Second opinion		0		NO							Insufficient follow-up
298	Known primary tumour	Urothelial tract (UCC)		2	carboplatin-gemcitabine; pembrolizumab		4	2		2	FGFR3 act mut; TSC1 inact mut		0	0			FGFR3 mut; MDM2 amp		98	5.8		0.197125	NO	BSC		0		NO							Insufficient follow-up
300	Cancer of unknown primary	CUP (Pancreas)		0			5	0		0			0	0			KRAS act mut; CDKN2A inact mut; TP53 inact mut; SMAD inact part loss; OR4F21 full loss VUS		19	0.9		2.33265	NO	Second opinion		0		NO							No actionable biomarkers detected
301	Known primary tumour	Urothelial tract		1	gemciabine-cisplatin (NIAGARA)		6	3		2	PIK3CA act mut; RAF1 amp		1	0	TML high		TP53 inact mut; CDKN2A loss; TERTp mut		265	10		3.25257	YES			1	pembrolizumab	NO							Standard-of-care biomarker was already treated before WGS
302	Known primary tumour	Lung (NSCLC)		2	osimertinib; crizotinib-osimertinib; osimertinib		5	2		1	PIK3CA act mut		1	0	EGFR act mut		TP53 inact mut; CDK4 amp; KRAS amp		113	4.5		20.4682	YES			4	osimertinib-crizotinib (same); carboplatin-pemetrexed-osimertinib; carboplatin-paclitaxel-atezolizumab-bevacizumab; atezolizumab-bevacizumab maintenance	NO							Ongoing response on previous treatment/complete remission
304	Known primary tumour	Lung (NSCLC)		0			3	2		1	TMB high		1	0	KRAS act mut				162	10.5		0.229979	NO	Deceased		0		NO							Insufficient follow-up
305	Known primary tumour	Prostate		4	LHRH; enzalutamide; docetaxel-pembrolizumab/placebo (M19KNT)		2	1		1	PTEN del		0	0			TMPRSS2-ERG fus		34	1.5		16.2628	YES			1	cabazitaxel	NO							No actionable standard-of-care biomarkers
306	Known primary tumour	Lung (NSCLC)		2	carboplatin-pemetrexed-pembrolizumab; pemetrexed-pembrolizumab maintenance		2	1		1	KRAS act mut		0	0			RBM10 inact mut		95	6.4		24.9692	YES			1	pemetrexed-pembrolizumab maintenance; JDQ443-tislelizumab (M20JDQ)	YES	KRAS	JDQ443 (opnurasib)	Experimental trial	M20JDQ	NCT04699188	III	No actionable standard-of-care biomarkers
307	Known primary tumour	Lung (NSCLC)		6	cisplatin; cisplatin-pemetrexed; pemetrexed mono; nivolumab mono; pemetrexed mono; docetaxel		5	2		2	HRD no substrate; TML high		0	0			NF1 inact mut; CTNNB1 mut		185	9.6		20.7967	YES			2	pemetrexed mono; talazoparib (DRUP)	YES	HRD	talazoparib	Experimental trial	DRUP (M15DRU)		II	No actionable standard-of-care biomarkers
308	Known primary tumour	Lung (NSCLC)		1	carboplatin-pemetrexed		2	0		0			0	0			BAP1 mut; NF2 mut		24	1.2		5.12526	YES			1	pembrolizumab-lenvatinib (N19PEM)	NO							No actionable standard-of-care biomarkers
309	Known primary tumour	Lung (NSCLC)		2	carboplatin-pemetrexed-pembrolizumab; carboplatin-paclitaxel		3	0		0			0	0			FBXW7 inact mut; TP53 loss; RB1 loss; RASA1 inact mut		110	7.9		7.55647	YES			1	gemcitabine mono	NO							No actionable standard-of-care biomarkers
310	Known primary tumour	Prostate		10	Casodex; abiraterone-prednison; docetaxel (M17DOC); enzalutamide (M16OST); cabazitaxel; cabazitaxel-carboplatin; carboplatin mono; carboplatin-abiraterone; enzalutamide; cyclofosfamide		4	2		2	PIK3CA inact mut; PTEN del		0	0			CDKN1B del; TMPRSS2-ERG fus		63	3.4		1.24846	NO	Deceased		1	cyclofosfamide (same)	NO							Insufficient follow-up
311	Known primary tumour	Colorectum (Colon)		0			4	1		0			0	1	KRAS absent		TMB high; TP53 inact mut; APC inact mut; EGFR amp		142	10.9		9.06776	YES			1	panitumumab	YES	KRAS absent	panitumumab	Reimbursed care				Actionable standard-of-care biomarker was treated
313	Known primary tumour	Head and neck (SCC)		0			6	1		1	TMB high		0	0			KIT mut VUS; CDKN2A inact mut; HRAS act mut; TP53 mut; UV signature		1003	52.3		21.1253	YES			1	nivo mono (N20MAT MATISSE)	YES	TMB	nivolumab	Experimental trial	MATISSE (N20MAT)	NCT05742607	N/A	No actionable standard-of-care biomarkers
314	Known primary tumour	Mesothelioma		1	cisplatin-pemetrexed		1	0		0			0	0			BAP1 loss		23	1.1		6.14374	YES			0	CyPep-1 (M19CPE)	NO							No actionable standard-of-care biomarkers
315	Known primary tumour	Lung (NSCLC)		1	osimertinib		5	2		1	PTEN del		1	0	EGFR act mut		RB1 inact mut; TP53 inact mut; KRAS amp		41	1.9		10.9733	YES			3	carboplatin-pemetrexed; paclitaxel-bevacizumab; osimertinib retreatment	NO							Ongoing response on previous treatment/complete remission
317	Known primary tumour	Mesothelioma		1	carboplatin-pemetrexed		2	1		1	HRD+BRCA2 inact mut		0	0			BAP1 inact mut		36	1.3		14.4887	YES			2	rucaparib (DRUP); carboplatin-pemetrexed	YES	HRD+BRCA2	rucaparib	Experimental trial	DRUP (M15DRU)		II	No actionable standard-of-care biomarkers
319	Known primary tumour	Soft tissue (Spindle cell sarcoma)		0			2	0		0			0	0			CDKN2A loss; NTRK3 fus		7	0.3		18.4641	YES			0		NO							No actionable standard-of-care biomarkers
321	Known primary tumour	Lung (Carcinoid; typical carcinoid)		0			0	0		0			0	0					15	0.6		19.384	YES			0		NO							No actionable standard-of-care biomarkers
322	Known primary tumour	Colorectum (Sigmoid)		2	CAPOX; FOLFIRI-B		3	1		0			1	0	KRAS present		APC inact mut; TP53 inact mut		82	4.3		9.29774	YES			2	irinotecan-bevacizumab; sunitinib (SUNRISE)	YES	KRAS present	no EGFR inhibitor	Reimbursed care				Actionable standard-of-care biomarker was treated
324	Known primary tumour	Breast (ER positive, Her2 negative)		3	tamoxifen; letrozol-gosereline; letrozol-palbociclib		3	1		1	FGFR1 amp		0	0			TP53 inact mut; ESR1 resist mut		26	1.4		18.924	YES			3	paclitaxel; vinorelbine; adriamycine-tamoxifen	NO							No actionable standard-of-care biomarkers
328	Known primary tumour	Lung (NSCLC)		1	osimertinib		3	3		1	CDK4 amp		2	0	EGFR act mut; MET amp		TP53 inact mut; MYC amp; FOXA1 amp; ZNF217 amp		95	6.5		6.80082	YES			1	capmatinib-osimertinib; carboplatin-paclitaxel-atezolizumab-bevacizumab	YES	MET+EGFR	capmatinib+osimertinib	Reimbursed care				Actionable standard-of-care biomarker was treated
329	Known primary tumour	Colorectum (Colon)		1	FOLFOX		4	1		0			1	0	KRAS act mut		APC inact mut; PIK3CA mut VUS; SMAD4 del		95	5.6		16.8542	YES			1	(likely FOLFOX)	NO							Ongoing response on previous treatment/complete remission
330	Known primary tumour	Breast (TNBC)		6	4x ddAC; letrozol; capecitabine; Teysuno; paclitaxel; adriamycine.		1	1		1	PIK3CA act mut		0	0					84	3.6		9.3963	YES			1	cisplatin-nivolumab (TONIC)	NO							No actionable standard-of-care biomarkers
333	Known primary tumour	Mesothelioma		1	carboplatin-pemetrexed		3	0		0			0	0			TERTp act mut; CDKN2A del; NF2 del		33	1.7		10.6448	YES			1	lenvatinib-pembrolizumab (N19PEM PEMMELA)	NO							No actionable standard-of-care biomarkers
334	Known primary tumour	Breast (TNBC)		0			6	4		3	PIK3CA act mut; PTEN inact mut; TMB high		1	0	HRD+BRCA2 inact mut		CDH1 inact mut; RB1 del		184	6.6		20.3368	YES			4	letrozol-palbociclib; capecitabine; carboplatin-paclitaxel; paclitaxel mono	NO							Ongoing response on previous treatment/complete remission
335	Known primary tumour	Mesothelioma		0			3	0		0			0	0			PBRM1 inact mut; BAP1 del; SETD2 del		12	0.8		0.229979	NO	Second opinion		0		NO							No actionable biomarkers detected
336	Known primary tumour	Lung (NSCLC)		1	erlotinib		5	2		1	TML high		1	0	EGFR act mut		TP53 splice mut; B2M inact mut VUS; PTEN del VUS		275	17.7		20.501	YES			2	carboplatin-paclitaxel-atezolizumab-bevacizumab; atezolizumab-bevacizumab maintenance	NO							Ongoing response on previous treatment/complete remission
337	Known primary tumour	Breast (ER positive, Her2 negative)		8	TAC; tamoxifen; Arimidex; capecitabine-vinorelbine; APD; anastrozol; fulvestrant-palbociclib; exemestane-everolimus		3	4		3	PPP2R3A inact mut; TMB high		1	0	PIK3CA act mut;				179	7.4		20.501	YES			1	pembrolizumab (DRUP); fulvestrant-alpelisib	YES	(1.) TMB; (2.) PIK3CA	(1.) pembrolizumab; (2.) alpelisib	(1.) Experimental trial; (2.) Reimbursed care	(1.) DRUP (M15DRU)		II	Actionable standard-of-care biomarker was treated
338	Known primary tumour	Lung (NSCLC)		1	encorafenib-binimetinib (M19EBL)		4	3		2	BRAF V600E act mut; PIK3CA act mut		1	0	BRAF V600E act mut		TP53 inact mut; SETD2 inact mut		114	6.6		7.0308	YES			1	encorafenib-binimetinib (M19EBL)	NO							Standard-of-care biomarker was already treated before WGS
339	Known primary tumour	Lung (NSCLC)		2	lorlatinib; carboplatin-paclitaxel-pembrolizumab		4	1		1	ROS1 fus		0	0			ROS1 resist mut; KLF5 act mut VUS; CDKN2A del		163	5.4		7.8193	YES			1	repotrectinib (M19TRI)	YES	ROS1	repotrectinib	Experimental trial	TRIDENT-1 (M19TRI)	NCT03093116	I/II	No actionable standard-of-care biomarkers
340	Known primary tumour	Lung (NSCLC)		1	alectinib		4	1		0			1	0	ALK fus		TP53 inact mut; LRP1B inact part del; PTPRD inact par del		38	2.3		3.18686	YES			1	carboplatin-pemetrexed-pembrolizumab	NO							Standard-of-care biomarker was already treated before WGS
341	Known primary tumour	Bladder (UCC)		2	ipilimumab-nivolumab (NABUCCO); gemcitabine-cisplatin		5	2		2	TSC1 inact mut; FGFR3 fus		0	0			TERTp act mut; TP53 inact mut; ELF3 inact mut		111	4.6		7.29363	YES			1	erdafitinib (M20THR)	YES	FGFR3	erdafitinib	Experimental trial	THOR	NCT03390504	III	No actionable standard-of-care biomarkers
342	Known primary tumour	Ovary (Extraovarial carcinoma)		0			4	1		1	MAP2K4 del		0	0			TP53 inact splice mut; CCNE1 amp VUS; RYR1 amp VUS		22	1.1		9.26489	YES			1	carboplatin-paclitaxel	NO							No actionable standard-of-care biomarkers
344	Known primary tumour	Mesothelioma		0			4	0		0			0	0			BCL9L mut; BAP1 inact part del; CDKN2A inact part del; NF2 inact part del		27	1.3		-0.328542	NO	Deceased		0		NO							No actionable biomarkers detected
345	Known primary tumour	Lung (NSCLC)		1	tepotinib (M18TEP)		5	3		2	TMB high; MET exon 14 skipping		1	0	ALK fus		CCNE1 amp; TP53 inact mut		382	25.1		4.04107	YES			1	crizotinib	YES	ALK	crizotinib	Reimbursed care				Actionable standard-of-care biomarker was treated
347	Known primary tumour	Breast (TNBC)		3	ddAC; carboplatin-paclitaxel; capecitabine		7	2		2	MAP2K4 part del; NTRK2 fus		0	0			TP53 inact mut; PTEN part del VUS; CTNNA1 pat del VUS; LZTR1 par del VUS; STAT5B part del VUS		64	3.2		22.9322	YES			1	larotrectinib (Drug Access Protocol)	YES	NTRK2	larotrectinib	Experimental trial: Early access protocol				No actionable standard-of-care biomarkers
349	Known primary tumour	Oesophagus/stomach (Stomach; mixed type carcinoma)		2	FLOT; paclitaxel-ramucirumab		3	2		2	MET amp; CDK6 amp		0	0			TP53 inact mut		91	8.2		1.05133	NO	Deceased		1	TAS-102-Lonsurf	NO							Insufficient follow-up
351	Known primary tumour	Lung (NSCLC)		1	carboplatin-pemetrexed-pembrolizumab		8	2		2	TMB high; CDK4 amp		0	0			MECOM amp; CCNE1 amp; PTPRD del; JAK2 del; DOCK8 del; PPP23B del		1631	106.6		22.9322	YES			0		NO							No actionable standard-of-care biomarkers
354	Known primary tumour	Soft tissue (Leiomyosarcoma)		0			2	0		0			0	0			TP53 part del; DOCK8 part del		54	2.3		22.8008	YES			1	doxorubicine-DTIC	NO							No actionable standard-of-care biomarkers
355	Known primary tumour	Lung (NSCLC)		4	erlotinib; osimertinib; crizotinib-osimertinib; osimertinib		4	1		0			1	0	EGFR exon 19 del		TP53 mut; MDM2 amp; FOXA1 amp		67	2.7		22.538	YES			3	carboplatin-paclitaxel-atezolizumab-bevacizumab; paclitaxel-bevacizumab; osimertinib retreatment	NO							Standard-of-care biomarker was already treated before WGS
356	Known primary tumour	Oesophagus/stomach (GEJ)		1	EOX		6	0		0			0	0			TP53 inact mut; PDGFRA act mut; FHIT loss; NF2 loss; HDHD1 loss; STS loss		64	3.8		2.89117	NO	Other hospital referral		0		NO							No actionable biomarkers detected
357	Cancer of unknown primary	CUP (Definitive CUP; possibly Anogenital; SCC)		0			2	0		0			0	0			HPV type 16; FBXW7 inact mut		79	3.7		22.078	YES			0		NO							No actionable biomarkers detected
359	Known primary tumour	Oesophagus/stomach (Oesophagus)		0			5	1		0			1	0	ERBB2 amp		TP53 inact mut; FHIT part del; RUNX1 part del; TOP2A del		114	8.5		0.62423	NO	Other hospital referral		0	(FOLFOX-trastuzumab)	NO							Insufficient follow-up
361	Known primary tumour	Lung (NSCLC)		0			7	2		1	TML high		1	0	EGFR act mut		TP53 inact mut; EGFR amp; KRAS amp; CDKN2A loss; AR mut		242	NULL		-0.427105	NO	Second opinion		1	carboplatin-pemetrexed-pembrolizumab	NO							Insufficient follow-up
363	Known primary tumour	Lung (NSCLC)		1	osimertinib		7	3		2	CDK6 amp; MET resist amp		1	0	EGFR act mut		EGFR amp; TP53 inact mut; CDKN2A inact del; FOXA1 amp		61	4.1		3.71253	YES			1	capmatinib (compassionate use)	YES	MET	capmatinib	Experimental trial: Compassionate use programme				Standard-of-care biomarker was already treated before WGS
364	Known primary tumour	Lung (NSCLC)		2	erlotinib; osimertinib		5	2		0			2	0	EGFR act mut; BRAF fus		TP53 inact mut; CDKN2A del; FOX amp		68	3.4		8.44353	YES			3	dabrafenib-trametinibetinib; carboplatin-paclitaxel-atezolizumab-bevacizumab; carboplatin-pem	YES	BRAF	dabrafenib-trametinibetinib	Reimbursed care				Actionable standard-of-care biomarker was treated
368	Known primary tumour	Lung (Carcinoid; atypical carcinoid)		1	everolimus		0	0		0			0	0					18	0.8		24.0493	YES			2	capecitabine-temozolomide; everolimus retreatment	NO							No actionable standard-of-care biomarkers
369	Known primary tumour	Mesothelioma		1	cisplatin-pemetrexed		3	0		0			0	0			BAP1 inact part del; WT1 inact mut; CDKN2A inact del		47	2.5		12.4517	YES			1	lenvatinib-pembrolizumab (N19PEM PEMMELA)	NO							No actionable standard-of-care biomarkers
371	Known primary tumour	Breast (ER positive, Her2 negative)		4	EC; paclitaxel-trastuzumab; trastuzumab emtansine-letrozol; letrozol-abemaciclib		3	0		0			0	0			TP53 inact mut; CSMD1 del; TCF12 del		50	2		2.06982	NO	Other hospital referral		0		NO							No actionable biomarkers detected
372	Known primary tumour	Uterus/endometrium		1	(carboplatin-paclitaxel)		4	3		3	TMB high; MSI no substrate; PTEN mut		0	0			TP53 inact mut		593	103.2		22.4394	YES			1	nivolumab (DRUP)	YES	MSI	nivolumab	Experimental trial	DRUP (M15DRU)		II	No actionable standard-of-care biomarkers
373	Known primary tumour	Oesophagus/stomach (Oesophagus)		0			2	0		0			0	0			APC inact mut; TP53 inact mut		107	7.8		1.21561	NO	Second opinion		0		NO							No actionable biomarkers detected
374	Known primary tumour	Breast (TNBC)		6	tamoxifen; letrozol; fulvestrant-palbociclib; exemestane-everolimus; capecitabine; paclitaxel		4	2		2	PIK3CA act mut; NF1 del		0	0			RB1 inact mut; RB1 inact mut; TP53 inact mut		81	4		3.44969	YES			1	adriamycin	NO							No actionable standard-of-care biomarkers
376	Known primary tumour	Colorectum (Sigmoid)		2	CAPOX-B; CAPIRI-B;		3	1		0			1	0	KRAS present		TP53 inact mut; APC inact mut		100	6.7		22.5051	YES			3	FOLFIRI-B; capecitabine-B; FOLFIRI	YES	KRAS present	no EGFR inhibitor	Reimbursed care				Actionable standard-of-care biomarker was treated
377	Known primary tumour	Lung (SCLC transformed)		2	CCRT; durvalumab		4	2		2	TMB high; PTEN part del		0	0			RB1 mut; TP53 mut		329	27		-0.197125	NO	Second opinion		1	carboplatin-etoposide	NO							Insufficient follow-up
378	Known primary tumour	Breast (TNBC)		1	ddAC-CP (SUBITO)		5	1		1	CCND1 amp		0	0			HR proficient; TP53 inact mut; MTOR amp; MYC amp; FGF3 amp		50	2.5		22.3409	YES			3	capecitabine; Teysuno; olaparib (SUBITO)	NO							No actionable standard-of-care biomarkers
379	Known primary tumour	Cervix		1	cisplatin-paclitaxel-bevacizumab		2	0		0			0	0			HPV type 16; KRAS act mut		52	2.3		1.44559	NO	Deceased		0		NO							No actionable biomarkers detected
380	Known primary tumour	Breast (ER positive, Her2 negative)		5	ddAC; tamoxifen; letrozol; palbociclib (M17SJA); fulvestrant (SONIA)		3	1		1	CHEK2 inact mut		0	0			ESR1 resist act mut; ZNF217 amp		60	3.3		3.38398	YES			1	capecitabine	NO							No actionable standard-of-care biomarkers
381	Cancer of unknown primary	CUP (Definitive CUP; possibly Ovary)		0			5	3		3	HRD no substrate; MAP2K4 inact mut; PTEN inact part del		0	0			TP53 inact mut; CTNNA1 inact part del		76	4.2		11.039	YES			0		NO							No actionable standard-of-care biomarkers
384	Known primary tumour	Lung (NSCLC)		0			5	1		1	ERBB2 act dup		0	0			TP53 inact mut; MYC amp; FOXA1 amp; ZNF217 amp		114	7		22.7351	YES			1	carboplatin-pemetrexed	NO							No actionable standard-of-care biomarkers
385	Known primary tumour	Small intestine (Duodenum)		0			4	2		2	TML high; MSI (based on MLH1+PMS2)		0	0			POLE mut; POLD1 mut		3465	363.6		22.2094	YES			1	nivolumab (DRUP)	YES	MSI	nivolumab	Experimental trial	DRUP (M15DRU)		II	No actionable standard-of-care biomarkers
386	Known primary tumour	Soft tissue (Epithelioid sarcoma)		1	doxorubicine-ifosfamide;		3	1		1	RAF1 amp		0	0			RB1 mut; TP53 mut		74	4.1		22.1109	YES			1	doxorubicine-ifosfamide	NO							No actionable standard-of-care biomarkers
388	Known primary tumour	Cervix		2	CCRT; carboplatin-paclitaxel-bevacizumab		4	2		2	TML high; PIK3CA act mut		0	0			CTNNB1 act mut; HPV type 18		195	7.5		7.65503	YES			1	carboplatin-paclitaxel-bevacizumab	NO							No actionable standard-of-care biomarkers
389	Known primary tumour	Prostate		1	ADT-docetaxel		4	1		1	PTEN part del		0	0			TMPRSS2-ERG fus; TP53 inact mut; RB1 del		38	1.9		5.78234	YES			1	carboplatin-cabazitaxel	NO							No actionable standard-of-care biomarkers
392	Known primary tumour	Lung (NSCLC)		3	carboplatin-pemetrexed-pembrolizumab; pemetrexed-pembrolizumab maintenance; docetaxel		3	1		1	TMB high		0	0			RB1 inact mut; TP53 inact mut		242	15.8		1.18275	NO	Deceased		0		NO							Insufficient follow-up
393	Known primary tumour	Lung (NSCLC)		2	osimertinib (TATIN); afatinib		5	2		1	PIK3R1 act mut		1	0	EGFR act mut		TP53 inact mut; MCL amp; CCNE1 amp		56	2.7		4.96099	YES			1	carboplatin-pemetrexed-osimertinib	NO							Ongoing response on previous treatment/complete remission
395	Cancer of unknown primary	CUP (Definitive CUP; possibly Urothelial tract)		0			5	2		2	RAF1 amp; TML high		0	0			CDH1 inact mut; CDKN1A inact mut; RB1 inact mut; NF2 inact mut		274	11.1		1.37988	NO	Second opinion		0		NO							Insufficient follow-up
396	Known primary tumour	Urothelial tract (Urethra)		1	capecitabine		5	0		0			0	0			KRAS act mut; TP53 inact mut; CDKN2A del; SPATA31A7 del; SMARCB1 del		73	4		0.262834	NO	Deceased		0		NO							No actionable biomarkers detected
397	Cancer of unknown primary	CUP (Definitive CUP; possibly Urothelial tract)		0			5	0		0			0	0			TP53 inact mut; SMAD4 inact mut; CDKN2A del; AXIN1 part del; EPS15L1-TFEB fus		89	4.2		0.0985626	NO	Second opinion		0		NO							No actionable biomarkers detected
398	Known primary tumour	Uterus/endometrium		2	tamoxifen; letrozol		6	1		1	PDGFRA/KIT/KDR coamp		0	0			PTEN inact mut; TP53 inact mut; PPP2R1A inact mut; ASXL1 inact mut VUS; TERT amp		NULL	NULL		2.59548	NO	Deceased		0		NO							Insufficient follow-up
399	Known primary tumour	Mesothelioma		1	carboplatin-pemetrexed		3	0		0			0	0			NF2 inact mut; FBXW7 inact mut; CDKN2A del		37	1.7		10.0534	YES			1	lenvatinib-pembrolizumab (N19PEM PEMMELA)	NO							No actionable standard-of-care biomarkers
404	Known primary tumour	Colorectum (Sigmoid)		2	FOLFOX-panitumumab; capecitabine-bevacizumab		3	2		1	TML high		0	1	KRAS absent		APC inact mut; TP53 inact mut		381	25.6		0.459959	NO	Second opinion		0		NO							Insufficient follow-up
405	Known primary tumour	Lung (NSCLC)		3	cisplatin-pemetrexed; durvalumab; osimertinib		3	2		1	MAP2K4 del		1	0	EGFR act mut		TP53 inact mut		87	4.2		0.197125	NO	Second opinion		0		NO							Insufficient follow-up
406	Known primary tumour	Lung (Carcinoid; atypical carcinoid)		1	everolimus		0	0		0			0	0			DPYD low metabolizer		26	1.1		3.94251	YES			1	capecitabine-temozolomide	NO							No actionable standard-of-care biomarkers
407	Known primary tumour	Breast (TNBC)		2	4x ddAC+12x carboplatin-paclitaxel; capecitabine		3	1		1	PIK3CA act mut		0	0			TP53 inact mut; CCNE1 amp		60	2.3		10.0862	YES			1	alpelisib-nab-paclitaxel (DLD EPIK-B3)	YES	PIK3CA	alpelisib	Experimental trial	EPIK-3B	NCT04251533	III	No actionable standard-of-care biomarkers
408	Known primary tumour	Breast (TNBC)		2	4x ddAC+4x carboplatin-paclitaxel; capecitabine; vinorelbine		5	0		0			0	0			RB1 inact mut; TP53 inact mut; ZNF703 amp; ZBTB10 amp; PABPC1 amp		103	5.5		0.952772	NO	Second opinion		1	vinorelbine	NO							No actionable biomarkers detected
409	Known primary tumour	Breast (ER positive, Her2 negative)		5	adriamycine-cyclofosfamide; paclitaxel; tamoxifen; anastrozol-palbociclib; fulvestrant-alpelisib		9	0		0			0	0			ESR1 resist act mut; GATA3 inact mut; CCND1 amp; FGF3 amp; MDM2 amp; IGFR1 amp; USP32 amp; PPM1D amp; CD79B amp		79	3.6		18.2012	YES			1	capecitabine (DESTINY Breast-06); fulvestrant-abemaciclib; paclitaxel;	NO							No actionable standard-of-care biomarkers
410	Known primary tumour	Lung (Carcinoid; atypical carcinoid)		2	cisplatin; everolimus		1	1		1	CCND2 amp; MDM2 amp		0	0					43	2.6		18.694	YES			1	capecitabine-temozolomide	NO							No actionable standard-of-care biomarkers
411	Known primary tumour	Uterus/endometrium		1	(adjuvant scheme)		3	3		3	PIK3R1 inact mut; PTEN inact mut; ATM del		0	0					78	3.8		0.919918	NO	Deceased		0		NO							Insufficient follow-up
412	Known primary tumour	Lung (NSCLC)		5	erlotinib; osimertinib; carboplatin-pem; pem mono; osimertinib retreatment		4	1		0			1	0	EGFR act mut		TP53 inact mut; CDKN2A del; TGFBR2 mut VUS		109	4.8		16.8214	YES			2	panitumumab-deruxtecan; osimertinib retreatment	NO							Ongoing response on previous treatment/complete remission
413	Known primary tumour	Ovary (Low grade serous carcinoma)		2	carboplatin-paclitaxel; Caelyx-bevacizumab-letrozol		1	0		0			0	0			ELF3 inact mut		5	0.5		18.2012	YES			2	Caelyx-bevacizumab-letrozole (same); letrozole mono	NO							No actionable standard-of-care biomarkers
415	Known primary tumour	Urothelial tract		3	carboplatin-gemcitabine; pembrolizumab; paclitaxel-tremelimumab-durvalumab (M18ICR)		4	0		0			0	0			ARID1A inact mut; TERTp act mut; ELF3 del VUS; CDKN2A del		NULL	NULL		18.4641	YES			1	enfortumab vedotin	NO							No actionable standard-of-care biomarkers
418	Known primary tumour	Lung (NSCLC)		1	capmatinib		4	2		2	TML high; NF1 splice mut		0	0			MET fus VUS; Human beta herpes virus 6B		449	25.3		18.2012	YES			1	nivolumab (M17FNN)	YES	TML	nivolumab	Experimental trial	M17FNN	NCT05742607	N/A	No actionable standard-of-care biomarkers
420	Cancer of unknown primary	CUP (Prostate)		2	LHRH; carboplatin-paclitaxel		5	1		1	PTEN del		0	0			TP53 mut; RB1 inact del; MYC amp; TMPRSS2-ERG fus		38	1.9		10.2834	YES			1	carboplatin-paclitaxel (same)	NO							No actionable standard-of-care biomarkers
421	Known primary tumour	Prostate		3	LHRH; abiraterone-prednison; docetaxel		4	1		1	PIK3CA act mut		0	0			APC inact mut; PTEN inact del; NDRG1-ERG fus		28	2.1		17.7741	YES			1	cabazitaxel	NO							No actionable standard-of-care biomarkers
422	Known primary tumour	Soft tissue (Myxoid liposarcoma)		3	doxorubicine-olaratumab; olaratumab mono; trabectedine		2	0		0			0	0			TERTp act mut; FUS-DDIT3 fus		25	1.3		11.1047	YES			1	ifosfamide; eribuline	NO							No actionable standard-of-care biomarkers
423	Known primary tumour	Colorectum (Colon)		0			4	2		1	KRAS act mut		1	0	KRAS present		TP53 inact mut; TCF7L2 inact mut VUS; APC inact part del		NULL	NULL		18.3326	YES			1	FUDR-FOLFOX; irinotecan-bevacizumab	YES	KRAS present	no EGFR inhibitor	Reimbursed care				Actionable standard-of-care biomarker was treated
424	Known primary tumour	Oesophagus/stomach (Stomach)		0			5	0		0			0	0			TP53 inact mut; CDH1 inact splice mut; MTOR amp; KRAS amp; MDM2 amp		NULL	NULL		1.24846	NO	Second opinion		0		NO							No actionable biomarkers detected
425	Known primary tumour	Lung (NSCLC)		1	osimertinib		4	1		0			1	0	EGFR act mut		BRAF fus; TP53 inact mut; CDKN2A del		46	2.3		17.807	YES			2	carboplatin-pemetrexed; osimertinib retreatment; paclitaxel-bevacizumab	NO							Standard-of-care biomarker was already treated before WGS
427	Known primary tumour	Soft tissue (Leiomyosarcoma)		3	doxorubicine; pazopanib; trabectedine		3	0		0			0	0			CDKN1A inact del; CDKN2A inact del; RB1 inact part del		27	1.6		2.52977	NO	Deceased		2	doxorubicine retreatment; letrozole	NO							No actionable biomarkers detected
428	Known primary tumour	Mesothelioma		2	carboplatin-pem; dendritic cells (DENIM)		1	0		0			0	0			CDKN2A loss		43	1.4		10.3162	YES			1	lenvatinib-pembrolizumab (N19PEM PEMMELA)	NO							No actionable standard-of-care biomarkers
430	Known primary tumour	Oesophagus/stomach (GEJ; signet ring)		0			1	0		0			0	0					127	8.2		9.56057	YES			0		NO							No actionable standard-of-care biomarkers
431	Known primary tumour	Breast (ER positive, Her2 positive)		6	9x paclitaxel-pertuzumab; trastuzumab-pertuzumab; tamoxifen; capecitabine-trastuzumab; TDM-1; vinorelbine		7	2		1	KIT/KDR/PDGFRA coamp		1	0	CCND1 amp		TP53 inact mut; EGFR amp; MYC amp; CAAP1-NFIB fus		69	3.3		10.7433	YES			2	trastuzumab-deruxtecan; capecitabine-tucatinib-trastuzumab	NO							Ongoing response on previous treatment/complete remission
433	Known primary tumour	Pancreas		1	FOLFIRINOX		3	0		0			0	0			KRAS act mut; CDKN2A inact del; TP53 inact part del; AXL amp; CD79A amp		49	2.1		5.61807	YES			0		NO							No actionable standard-of-care biomarkers
434	Known primary tumour	Breast (TNBC)		2	4x ddAC; carboplatin-paclitaxel		2	0		0			0	0			TP53 inact mut; ADAM30 amp VUS; ANK1 amp VUS; IKBKB amp VUS		38	2.1		0.459959	NO	Second opinion		0		NO							No actionable biomarkers detected
436	Known primary tumour	Lung (NSCLC)		2	cisplatin-pemetrexed; nivolumab (M16N24)		2	0		0			0	0			TML low; HRD no substrate		138	5.3		18.2012	YES			0		NO							No actionable standard-of-care biomarkers
437	Known primary tumour	Ovary		4	carboplatin-paclitaxel; carboplatin-Caelyx; letrozol; tamoxifen		3	1		1	PIK3CA inact mut		0	0			KRAS act mut; RB1 inact mut		41	2.1		2.82546	NO	Deceased		0		NO							Insufficient follow-up
438	Known primary tumour	Brain/CNS (Glioblastoma Multiforme)		1	temozolomide		4	1		1	EGFR amp		0	0			TERTp mut; CDKN2A del; EGFRvIII act del mut		38	1.9		2.33265	NO	Deceased		0		NO							Insufficient follow-up
439	Known primary tumour	Lung (NSCLC)		6	erlotinib; osimertinib; carboplatin-pemetrexedosimertinib; carboplatin-paclitaxel-atezolizumab-bevacizumab; osimertinib retreatment; capmatinib (ORA-LM)		5	2		1	TMB high		1	0	EGFR act mut		MET resist mut; TP53 inact mut; SMARCA4 inact		168	7.2		8.87064	YES			1	capmatinib-osimertinib-paclitaxel-bevacizumab	YES	EGFR+MET resistance	osimertinib-capmatinib	Reimbursed care				Actionable standard-of-care biomarker was treated
440	Known primary tumour	Pancreas (Neuro-endocrine; NEC)		1	capecitabine-temozolomide		3	0		0			0	0			NRAS act mut; CTNNB1 act mut; SMAD4 inact mut		22	1.5		1.01848	NO	Deceased		0		NO							No actionable biomarkers detected
441	Known primary tumour	Head and neck (Oropharynx)		0			3	0		0			0	0			HPV type 33; no UV signature; TMB low		28	1.7		18.1027	YES			0		NO							No actionable standard-of-care biomarkers
442	Cancer of unknown primary	CUP (Skin; SCC)		0			7	1		1	TML high		0	0			UV signature; TERT act mut; RAD50 inact mut; TP53 inact mut; CDKN2A del; PTPRD del		1344	81		18.0041	YES			0		NO							No actionable standard-of-care biomarkers
443	Known primary tumour	Lung (NSCLC)		0			7	2		2	TML high; NF1 inact homoz disrup+RASA1 inact mut;		0	0			SMARCA4 inact mut; TP53 inact mut; NOTCH1 inact mut; TGFBR2 inact del		315	22.3		0.591376	NO	Deceased		0		NO							Insufficient follow-up
444	Cancer of unknown primary	CUP (Definitive CUP; possibly Upper GI)		0			7	1		1	MDM2 amp		0	0			EPHA2 inact mut; ARID1A inact mut; TP53 inact mut; CTNNA1 part del; NSD1 part del; CDKN2A del		45	2		-0.229979	NO	Second opinion		0		NO							Insufficient follow-up
445	Known primary tumour	Lung (NSCLC)		1	osimertinib (M18TAT)		3	3		2	PIK3CA act mut; MDM2 amp		1	0	EGFR act mut				39	1.3		16.1643	YES			1	osimertinib (same)	NO							Standard-of-care biomarker was already treated before WGS
446	Cancer of unknown primary	CUP (Lung; SCLC)		0			4	1		1	TML high		0	0			RB1 inact mut; TP53 inact mut; CCNE1 amp		272	20.4		8.77207	YES			1	cisplatin-etoposide	NO							No actionable standard-of-care biomarkers
447	Known primary tumour	Lung (NSCLC)		2	afatinib; osimertinib		6	1		0			1	0	EGFR act mut		SETD2 part inact mut; TP53 inact mut; PTPRD inact del; CDKN2A inact del; EZH2 amp		70	4.5		17.6099	YES			1	osimertinib (same)	NO							Standard-of-care biomarker was already treated before WGS
448	Known primary tumour	Mesothelioma		1	carboplatin-pemetrexed		4	0		0			0	0			TMB low; MSS; BAP1 mut; PHOX2B mut; STK11 mut; CDKN2A del		36	1.8		7.0308	YES			1	lenvatinib-pembrolizumab (N19PEM PEMMELA)	NO							No actionable standard-of-care biomarkers
449	Known primary tumour	Lung (NSCLC)		1	osimertinib		5	2		1	BRCA2 inact mut (with HRD)		1	0	EGFR act mut		CDKN2A loss; TP53 loss; EGFR resist mut		104	5		17.6427	YES			2	osimertinib-gefitinib (M19ORC-2 ORCHARD)	YES	EGFR	osimertinib-gefitinib	Experimental trial	ORCHARD (M19ORC)	NCT03944772	II	Study treatment for standard-of-care biomarker
450	Known primary tumour	Soft tissue (Angiosarcoma)		0			1	1		1	PIK3CA act mut		0	0			CDKN2A del		27	1.4		16.9528	YES			0		NO							No actionable standard-of-care biomarkers
453	Known primary tumour	Soft tissue (Rhabdomyosarcoma)		1	IVADo		2	0		0			0	0			TP53 inact mut; BCOR inact mut VUS		82	4.1		17.8727	YES			2	IVA; vinorelbine-cyclofosfamide	NO							No actionable standard-of-care biomarkers
454	Known primary tumour	Breast (ER positive, Her2 negative)		7	6x TAC; tamoxifen; capecitabine; paclitaxel; letrozol; bevacizumab; fulvestrant-palbociclib		5	1		0			1	0	HRD+BRCA1 inact homoz disrup		ESR1 resist inact mut; TP53 inact mut; DEPDC5 part del VUS; ZBTB10 amp VUS		129	4.9		0.427105	NO	Deceased		1	eribuline	NO							Insufficient follow-up
455	Known primary tumour	Colorectum (Colon)		3	FOLFOX-bevacizumab; cetuximab-encorafenib-binimetinib (M16BCR); FOLFIRI		5	2		2	MAP2K4 inact mut; BRAF V600E act mut		0	0			APC inact mutl TP53 inact mutl SMAD4 del		109	6.2		17.4127	YES			1	dabrafenib-LTT462-TNO155 (M20CPC-3)	YES	BRAF	dabrafenib-LTT462-TNO155	Experimental trial	M20CPC	NCT04294160	Ib	No actionable standard-of-care biomarkers
456	Known primary tumour	Prostate		5	LHRH; Casodex; bicalutamide; LHRHa; abiraterone-prednison		4	0		0			0	0			FOXA1 act mut; AR amp; MYC amp; RB1 inact part del		47	3		15.4415	YES			4	docetaxel; enzalutamide; cabazitaxel; cabazitaxel-carboplatin	NO							No actionable standard-of-care biomarkers
458	Known primary tumour	Oesophagus/stomach (Oesophagus) [previously Sarcoma (SBRC)]		0			5	0		0			0	0			KRAS mut; CTNNB1 act mut; CDKN2A del; BRAF mut VUS; SMARCA4 inact homoz disrup		89	7		-2.13552	NO	Deceased		0		NO							No actionable biomarkers detected
459	Known primary tumour	Prostate		3	docetaxel-ODM-201/placebo (ARASENS); abiraterone-prednison; carboplatin-cabazitaxel		8	1		1	PTEN inact del		0	0			AR resist amp; TP53 inact mut; TBL1XR1 inact mut; TMPRSS2-ERG fus; ETS2 del; KDM6A del; AMER1 del		24	1.3		8.21355	YES			1	carboplatin-cabazitaxel	NO							No actionable standard-of-care biomarkers
460	Known primary tumour	Breast (ER positive, Her2 negative)		5	ddAC-paclitaxel; tamoxifen; capecitabine; letrozol-palbociclib; paclitaxel		4	3		2	TML high; FGFR1 amp		1	0	PIK3CA act mut		TP53 inact mut		161	7.3		20.5339	YES			1	fulvestrant-alpelisib	YES	PIK3CA	alpelisib	Reimbursed care				Actionable standard-of-care biomarker was treated
463	Known primary tumour	Soft tissue (Rhabdomyosarcoma)		1	IVADo		2	0		0			0	0			CDKN2A del; FUS-TFCP2 fus		13	1.2		4.53388	YES			0		NO							No actionable standard-of-care biomarkers
464	Known primary tumour	Brain/CNS (Glioblastoma Multiforme)		1	temozolomide		6	0		0			0	0			MSS; TERTp act mut; EGFRvIII act exon skipping; EGFR amp; CDKN2A inact del; PTEN inact part del		47	3.2		15.6715	YES			1	lomustine	NO							No actionable standard-of-care biomarkers
465	Known primary tumour	Soft tissue (Angiosarcoma)		0			4	1		1	TML high		0	0			UV signature; TP53 inact mut; TP53 inact splice mut		686	49.9		20.4682	YES			1	doxorubicine	NO							No actionable standard-of-care biomarkers
466	Known primary tumour	Lung (NSCLC)		2	osimertinib; carboplatin-pemetrexed-osimertinib		8	2		1	TMB high		1	0	EGFR act mut		RB1 inact mut; TP53 inact mut; DDX3X inact mut VUS; CTNNA1 part del VUS; KDM5C del VUS; KLF5 amp VUS		155	5.9		10.152	YES			1	trastuzumab deruxtecan-durvalumab-cisplatin (M20DSL)	NO							Standard-of-care biomarker was already treated before WGS
467	Known primary tumour	Mesothelioma		1	MesoPher (M17DNM DENIM)		6	1		1	HRD+BRCA2 inact mut		0	0			BAP1 inact mut; NF2 inact mut; TP53 inact mut; CDKN2A del		64	3.5		16.2628	YES			1	lenvatinib-pembrolizumab (N19PEM PEMMELA)	NO							No actionable standard-of-care biomarkers
469	Known primary tumour	Urothelial tract (UCC)		2	carboplatin-gemcitabine; avelumab		6	1		1	RAF1 amp		0	0			TP53 inact mut; KMT2D inact mut; KMT2D inact splice mut; MYC amp		83	3.7		3.54825	YES			1	tremelimumab (M18ICR)	NO							No actionable standard-of-care biomarkers
471	Known primary tumour	Ovary		2	carboplatin-paclitaxel; carboplatin-adavosertib D1-3 (M10MKO)		4	1		1	HRD no substrate		0	0			TP53 inact mut; PTPN13 del VUS; RB1 inact homoz disrup		103	5.2		14.0945	YES			4	Caelyx-bevacizumab; Caelyx mono; paclitaxel mono; talazoparib (M15DRU)	YES	HRD	talazoparib	Experimental trial	DRUP (M15DRU)		II	No actionable standard-of-care biomarkers
472	Known primary tumour	Pancreas		2	PEOPANC; gemcitabine		5	2		2	PIK3CA act mut; KRAS act mut		0	0			RNF43 mut VUS; ERBB4 splice mut VUS		37	2.7		9.82341	YES			1	FOLFIRINOX	NO							No actionable standard-of-care biomarkers
473	Known primary tumour	Lung (NSCLC)		1	osimertinib		5	2		1	ERBB2 amp		1	0	EGFR act mut		BCOR inact mut; TP53 inact mut; CDKN2A del		32	2.7		18.8912	YES			1	osimertinib	NO							Standard-of-care biomarker was already treated before WGS
474	Known primary tumour	Uterus/endometrium		1	(hormonal therapy)		3	1		1	PTEN inact mut		0	0			CTNNB1 mut; KMT2D mut VUS		34	1.3		19.2854	YES			1	(hormonal therapy)	NO							No actionable standard-of-care biomarkers
476	Known primary tumour	Lung (NSCLC)		1	osimertinib		1	1		0			1	0	EGFR act mut				30	1.8		9.03491	YES			1	carboplatin-pemetrexed	NO							Standard-of-care biomarker was already treated before WGS
477	Known primary tumour	Soft tissue (Liposarcoma)		2	adriamycine-olaratumab; cabazitaxel (EORTC E1202)		2	2		2	CDK4 amp; MDM2 amp		0	0			MCL1 amp VUS		27	1.2		17.3142	YES			2	eribuline; abemaciclib (DRUP)	YES	CDK4	abemaciclib	Experimental trial	DRUP (M15DRU)		II	No actionable standard-of-care biomarkers
480	Known primary tumour	Cervix (SCC)		2	CCRT; carboplatin-paclitaxel-bevacizumab		3	0		0			0	0			HPV type 45; STK11 inact mut; USP22 del VUS		101	5.2		2.59548	NO	Deceased		1	capecitabine	NO							No actionable biomarkers detected
481	Known primary tumour	Oesophagus/stomach (GEJ)		2	CAPOX-trastuzumab; carboplatin-paclitaxel		5	2		1	TMB high		1	0	ERBB2 amp		TP53 inact mut; SMAD4 mut; TOP2A amp		231	26.6		7.72074	YES			1	BI 1810631 (M21BIM)	NO							Low performance status
484	Known primary tumour	Breast (ER positive, Her2 negative)		2	ddAC-paclitaxel; letrozol		9	2		1	CCND1 amp		1	0	PIK3CA act mut		HR proficient; ARID1A inact mut VUS; NF1 mut VUS; FGF3 coamp; RSF1 resist amp; ZNF217 amp VUS; GNAS amp VUS		381	12.9		20.271	YES			5	capecitabine-vinorelbine; carboplatin-capecitabine; gemcitabine-tamoxifen; paclitaxel; Caelyx	NO							Low performance status
485	Known primary tumour	Soft tissue (Leiomyosarcoma)		3	doxorubicine-olaratumab; trabectedine; DTIC		2	0		0			0	0			TP53 inact homoz disrup; RB1 inact homoz disrup		54	3.6		5.74949	YES			1	DTIC	NO							No actionable standard-of-care biomarkers
486	Known primary tumour	Ovary		1	carboplatin-paclitaxel		1	0		0			0	0			TP53 inact splice mut		52	2.9		19.1211	YES			1	tamoxifen	NO							No actionable standard-of-care biomarkers
487	Cancer of unknown primary	CUP (Definitive CUP; possibly Biliary tract)		1	FOLFIRI		3	0		0			0	0			TP53 inact mut; RBM10 inact mut VUS; ZMIZ1 amp VUS		64	4.4		0.0985626	NO	Second opinion		0		NO							No actionable biomarkers detected
488	Cancer of unknown primary	CUP (Definitive CUP; possibly Anogenital)		1	carboplatin-paclitaxel		7	2		2	TML high; PIK3CA act mut		0	0			HPV type 16; B2M inact; KMT2C inact; KMT2D inact; IGF1R amp		1147	47.8		0.229979	NO	Second opinion		0		NO							Insufficient follow-up
489	Known primary tumour	Colorectum (Colon)		1	CAPOX-B		5	2		0			1	1	BRAF V600E act mut; KRAS absent		MSI; TMB low; PTEN inact mut; TP53 inact mut; APC inact mut; PIK3R1 inact mut		119	5.3		20.2053	YES			1	CAPOX-B	NO							Ongoing response on previous treatment/complete remission
490	Known primary tumour	Lung (NSCLC)		5	alectinib; brigatinib; lorlatinib; carboplatin-pemetrexed-lorlatinib; lorlatinib-pemetrexed maintenance		3	1		0			1	0	ALK fus		ALK resist mut; ALK resensitisation mut		17	0.6		20.0082	YES			2	crizotinib-lorlatinib; paclitaxel-bevacizumab-lorlatinib	YES	ALK	crizotinib-lorlatinib	Reimbursed care				Actionable standard-of-care biomarker was treated
491	Known primary tumour	Lung (Carcinoid; atypical carcinoid)		0			1	1		1	TSC1 inact splice mut		0	0					13	1		19.9754	YES			2	lanreotide; everolimus	NO							No actionable standard-of-care biomarkers
494	Known primary tumour	Soft tissue (Liposarcoma)		0			3	1		1	MDM2 amp		0	0			CDKN2A del; PTPRD del		61	3.4		2.75975	NO	Deceased		0		NO							Insufficient follow-up
495	Cancer of unknown primary	CUP (Kidney; RCC)		0			3	1		1	TMB high		0	0			BAP1 inact mut; CDKN2A inact mut; NOTCH1 mut VUS; TG mut VUS		167	NULL		0.262834	NO	Deceased		0		NO							Insufficient follow-up
496	Known primary tumour	Colorectum (Colon)		1	FOLFIRI-B; TAS-102		6	3		2	FGFR2 amp		1	0	KRAS absent		TMB high; TP53 inact mut; CTNNB1 amp; FHIT del VUS; LRRN3 del VUS		171	12.7		0.0328542	NO	Second opinion		0		NO							Insufficient follow-up
497	Known primary tumour	Prostate		2	LHRH; abirateron		8	1		1	PTEN loss		0	0			TMPRSS2-ERG fus; AR resist amp; TP53 inact mut; MED12 mut; CDKN2A loss; DIAPH2 loss; KDM6A loss		47	2.1		3.0883	YES			0		NO							No actionable standard-of-care biomarkers
498	Known primary tumour	Breast (ER positive, Her2 negative)		5	tamoxifen-trastuzumab; anastrozol-trastuzumab; exemestaan-trastuzumab; fulvestrant-trastuzumab; tamoxifen-trastuzumab		4	3		2	FGFR1 amp; CCND1 amp		1	0	PIK3CA act mut;		MGA inact mut VUS		67	3.6		19.614	YES			2	letrozol-palbociclib-trastuzumab; capecitabine	NO							Ongoing response on previous treatment/complete remission
499	Known primary tumour	Lung (NSCLC)		3	EGF816 (M15CEG); crizotinib-osimertinib; osimertinib		6	3		2	TML high; CDK4 amp		1	0	EGFR exon 19 del mut		TP53 del mut; MYC amp; KRAS resist amp		308	12.9		6.01232	YES			3	carboplatin-pemetrexed; osimertinib; paclitaxel	YES	EGFR	osimertinib	Reimbursed care				Actionable standard-of-care biomarker was treated
500	Cancer of unknown primary	CUP (Definitive CUP; possibly Small intestine; duodenum)		0			4	1		1	RNF43 inact mut		0	0			KRAS act mut; CDKN2A inact mut; ARID1A inact mut		39	2.6		12.0903	YES			3	CAPOX; FOLFOX; S1-OX	NO							No actionable standard-of-care biomarkers
501	Known primary tumour	Lung (NSCLC)		2	alectinib; lorlatinib; carboplatin-pemetrexed		4	0		0			0	0			TMB high; CDKN2A loss; NEGR1 part loss; FHIT part loss		149	8.4		0.361396	NO	Deceased		0		NO							No actionable biomarkers detected
502	Known primary tumour	Lung (NSCLC)		2	afatinib; osimertinib		5	2		1	MET amp		1	0	EGFR act mut		TP53 inact mut; CDKN2A del; CCNE1 amp		59	2.7		10.8419	YES			2	capmatinib-osimertinib; osimertinib	YES	MET+EGFR	capmatinib+osimertinib	Reimbursed care				Actionable standard-of-care biomarker was treated
503	Known primary tumour	Soft tissue (Myxoid liposarcoma)		1	doxorubicine; trabectedine		2	0		0			0	0			TERTp mut; FUS-DDIT3 fus		20	0.9		5.05955	YES			1	trabectedine	NO							No actionable standard-of-care biomarkers
507	Known primary tumour	Skin (SCC)		0			6	1		1	TMB high		0	0			UV signature; CDKN2A inact mut; TERTp mut; TP53 inact mut; RBM10 splice mut		1128	58.5		19.8439	YES			1	ipilimumab-nivolumab (N20MAT MATISSE)	YES	TMB	ipilimumab-nivolumablumab	Experimental trial	MATISSE (N20MAT)	NCT05742607	N/A	No actionable standard-of-care biomarkers
508	Known primary tumour	Ovary (Low grade serous carcinoma)		0			0	0		0			0	0					12	0.5		19.8111	YES			0		NO							No actionable standard-of-care biomarkers
509	Cancer of unknown primary	CUP (Skin; SCC)		0			5	1		1	TML high		0	0			ALK resist mut VUS; TERTp mut; CDKN2A inact mut; TP53 inact mut		1484	67.8		19.8111	YES			1	nivolumab mono (N20MAT MATISSE)	YES	TML	nivolumab	Experimental trial	MATISSE (N20MAT)	NCT05742607	N/A	No actionable standard-of-care biomarkers
510	Known primary tumour	Soft tissue (Leiomyosarcoma)		1	doxorubicine-DTIC		5	0		0			0	0			TP53 inact mut; ATRX inact mut; RB1 del; RAD51B del; ZFP36L1 del		49	3.3		19.3183	YES			2	doxorubicine-DTIC; trabectedine	NO							No actionable standard-of-care biomarkers
511	Known primary tumour	Penis		1	atezolizumab (PERICLES)		4	2		2	MAP2K1 act mut; EGFR amp		0	0			CDKN2A inact mut; TP53 inact mut		83	3.3		14.7844	YES			1	dacomitinib (DRUP)	YES	EGFR	dacomitinib	Experimental trial	DRUP (M15DRU)		II	No actionable standard-of-care biomarkers
513	Cancer of unknown primary	CUP (Oesophagus/stomach)		0			9	0		0			0	0			KRAS act mut; TP53 inact mut; TGFBR1 inact mut VUS; ACVR2A del; IMMP2L del; CDKN2A del; MACROD2 del; MPL amp; AXL part amp		40	2.1		0.197125	NO	Deceased		0		NO							No actionable biomarkers detected
514	Known primary tumour	Urothelial tract (UCC)		3	carboplatin-gemcitabine; pembrolizumab; tremelimumab		3	3		3	HRD+BRCA1 loss; TML high; PTEN inact part del		0	0					209	9.1		18.5298	YES			2	tremelimumab; pembrolizumab	NO							No actionable standard-of-care biomarkers
515	Known primary tumour	Soft tissue (Synoviosarcoma)		1	doxorubicine-ifosfamide;		2	1		1	FGFR2 fus		0	0			SS18-SSX2 fus		31	1.9		7.22793	YES			2	TCRT (Barcelona); pazopanib	NO							No actionable standard-of-care biomarkers
516	Known primary tumour	Soft tissue (Liposarcoma)		0			5	2		2	MDM2 amp; CDK4 amp		0	0			ATRX del; HMGA2-FAT3 fus; HMGA2-TSFM fus		33	1.5		19.5483	YES			0		NO							No actionable standard-of-care biomarkers
517	Known primary tumour	Lung (NSCLC)		3	carboplatin-pemetrexed-pembrolizumab; pemetrexed-pembrolizumab maintenance; entrectinib (M16SST)		3	1		1	NTRK1 fus		0	0			ARID1B del mut; CDKN2A del		41	2.8		5.97947	YES			1	repotrectinib (M19TRI)	YES	NTRK1	repotrectinib	Experimental trial	TRIDENT-1 (M19TRI)	NCT03093116	I/II	No actionable standard-of-care biomarkers
519	Known primary tumour	Soft tissue (Liposarcoma)		0			5	2		2	CDK4 amp; MDM2 amp		0	0			HMGA2-GRIP1 fus; NF1 homoz disrup; CD79B amp		44	2		10.152	YES			0		NO							No actionable standard-of-care biomarkers
520	Cancer of unknown primary	CUP (Definitive CUP; possibly Teratoma; dedifferentiated)		0			5	2		2	TML high; MSI+MLH1 LOH		0	0			APC inact mut; CDKN2A del; POLE inact mut		321	23.3		19.2526	YES			2	FOLFOXIRI; nivolumab (compassionate use)	YES	MSI+MLH1	nivolumab	Experimental trial: Compassionate use programme				No actionable standard-of-care biomarkers
522	Known primary tumour	Lung (NSCLC)		1	osimertinib		7	3		2	CCND3 amp; CDK4 amp		1	0	EGFR act mut		TP53 inact mut; EGFR amp; PTPRD del		109	7.3		16.1314	YES			1	osimertinib (same)	NO							Standard-of-care biomarker was already treated before WGS
523	Known primary tumour	Lung (NSCLC)		7	crizotinib; alectinib; carboplatin-pemetrexed; pemetrexed mono; lorlatinib; brigatinib; TIL; lorlatinib-brigatinib		9	2		1	RAD51B inact homoz disrup		1	0	ALK fus		ALK resist mut; TP53 inact mut; CDKN2A inact mut; NFE2L2 act mut VUS; LZTR1 inact mut VUS; APOBEC signature; TML high		146	7		1.18275	NO	Deceased		1	carboplatin-pemetrexed-pembrolizumab	NO							Insufficient follow-up
524	Known primary tumour	Breast (ER positive, Her2 negative)		5	tamoxifen-LHRHa; letrozol (SONIA); fulvestrant-palbociclib; capecitabine; vinorelbine-eribuline		4	3		2	PTEN inact mut; MAP2K4 del		1	0	PIK3CA act mut		TP53 inact mut		107	4.1		1.67556	NO	Deceased		1	fulvestrant-alpelisib	YES	PIK3CA	alpelisib	Reimbursed care				Treated but less than 3 months follow-up
525	Known primary tumour	Prostate		5	docetaxel; LHRH; enzalutamide; cabazitaxel; olaparib; carboplatin		6	1		1	PTEN del		0	0			PIK3R1 inact mut; TP53 inact mut; ZNRF3 inact mut VUS; JAK1 del; TMPRSS2-ERG fus		21	1.4		1.37988	NO	Second opinion		0		NO							Insufficient follow-up
526	Cancer of unknown primary	CUP (Definitive CUP; possibly Upper GI)		0			3	1		1	ERBB3 act mut		0	0			CTNNB1 act mut; TP53 inact mut		107	8.2		0.131417	NO	Second opinion		0		NO							Insufficient follow-up
527	Known primary tumour	Lung (NSCLC)		1	osimertinib		4	2		1	HRD no substrate		1	0	EGFR act mut		TP53 inact mut; RB1 inact mut		97	4.2		15.6386	YES			2	osimertinib (same); carboplatin-pemetrexedosimertinib	NO							Ongoing response on previous treatment/complete remission
528	Known primary tumour	Bladder (UCC)		2	carboplatin-gemcitabine; pembrolizumab		5	1		1	TML high		0	0			BAP1 inact mut; CDKN2A inact mut; TP53 inact mut; PARD3 del VUS		184	7.8		4.96099	YES			1	tremelimumab (M18ICR)	NO							No actionable standard-of-care biomarkers
529	Cancer of unknown primary	CUP (Definitive CUP; possibly Upper GI/thymus)		0			2	1		0			1	0	ERBB2 amp		TP53 inact mut		94	5.3		12.4189	YES			2	CAPOX-trastuzumab; BI1810631 (M21BIM)	YES	ERBB2	trastuzumab	Reimbursed care				Actionable standard-of-care biomarker was treated
530	Known primary tumour	Mesothelioma		1	pemetrexed mono		4	0		0			0	0			MTOR act mut; BAP1 inact mut; NF2 inact mut; TP53 inact mut		25	1.1		16.3285	YES			1	lenvatinib-pembrolizumab (N19PEM PEMMELA)	NO							No actionable standard-of-care biomarkers
531	Cancer of unknown primary	CUP (Lung; NSCLC)		0			4	0		0			0	0			TP53 inact mut; RB1 inact splice mut; MYC amp; CD44 amp		13	1		0.459959	NO	Other hospital referral		0		NO							No actionable biomarkers detected
532	Known primary tumour	Lung (NSCLC)		1	osimertinib		6	3		1	PTEN part inact mut		2	0	EGFR act mut; BRAF V600E act mut		EGFR resist mut; CDKN2A del; TERT amp		95	4.7		3.61396	YES			2	osimertinib-selumetinib (M19ORC ORCHARD); carboplatin-pemetrexed	YES	EGFR+BRAF	osimertinib-selumetinib	Experimental trial	ORCHARD (M19ORC)	NCT03944772	II	Study treatment for standard-of-care biomarker
533	Known primary tumour	Soft tissue (Sarcoma NOS)		0			3	1		1	PTEN inact mut		0	0			TP53 fus VUS; RB1 inact homoz disrup		29	1.5		11.6961	YES			2	doxorubicine; pazopanib	NO							No actionable standard-of-care biomarkers
534	Known primary tumour	Uterus/endometrium		0			10	4		4	MSI no substrate; TML high; PIK3CA act mut; PTEN inact mut		0	0			KRAS act mut; CCND1 act mut; ARID1A inact mut; ARID1B inact mut; CIC inact mut; SMARCB1 inact mut		319	27.8		3.8768	YES			1	dostarlimab	YES	MSI	dostarlimab	Experimental trial: Early access protocol				No actionable standard-of-care biomarkers
535	Known primary tumour	Prostate		4	docetaxel; enzalutamide; pembrolizumab-olaparib; cabazitaxel		4	1		1	PTEN del		0	0			TBX3 inact mut; TP53 inact mut; AR resist amp		72	4.4		6.89938	YES			0		NO							No actionable standard-of-care biomarkers
536	Known primary tumour	Testis (Non-seminoma)		2	EP; EVAIA (doxorubicine/actinomycine D)		1	0		0			0	0			CHEK2 mut		10	0.6		6.37372	YES			2	VAI; gemcitabine	NO							No actionable standard-of-care biomarkers
538	Known primary tumour	Colorectum (Sigmoid)		1	CAPOX		4	2		1	CCND3 amp		0	1	KRAS absent		KRAS amp; CD44 amp; TP53 inact mut		91	5.7		2.85832	NO	Other hospital referral		0		NO							Insufficient follow-up
539	Known primary tumour	Lung (NSCLC)		0			2	2		2	TML high; ERBB2 amp		0	0			RB1 inact mut; KEAP1 inact mut; ARID1B inact mut		1	0		15.5072	YES			2	carboplatin-pemetrexed-pembrolizumab; pembrolizumab mono	NO							No actionable standard-of-care biomarkers
540	Cancer of unknown primary	CUP (Lung; NSCLC)		0			5	2		2	TML high; ERBB2 amp		0	0			RB1 inact mut; KEAP1 inact mut; ARID1B inact mut		1874	124.7		14.2259	YES			2	carboplatin-pemetrexed-pembrolizumab; pembrolizumab mono	NO							No actionable standard-of-care biomarkers
542	Cancer of unknown primary	CUP (Biliary tract)		0			5	0		0			0	0			IDH1 act mut; PTPN11 act mut; CDKN2A inact mut; TP53 del; ARID1A del		49	2.8		0.0328542	NO	Second opinion		0		NO							No actionable biomarkers detected
543	Cancer of unknown primary	CUP (Colorectum; Colon)		1	CAPOX		5	4		3	CHEK2 inact mut; KRAS act mut; PIK3CA act mut		1	0	KRAS present		APC inact mut; FHIT inact part del		100	6.1		4.82957	YES			1	CAPOX (same)	YES	KRAS present	no EGFR inhibitor	Reimbursed care				Actionable standard-of-care biomarker was treated
544	Known primary tumour	Lung (NSCLC)		1	pembrolizumab		7	1		0			1	0	ALK fus		ALK resist mut; TP53 inact mut; CDKN2A del; CCND3 amp; MYC amp; CD44 amp		45	2.4		15.4743	YES			3	alectinib; lorlatinib; carboplatin-pemetrexed	YES	ALK	alectinib	Reimbursed care				Actionable standard-of-care biomarker was treated
546	Known primary tumour	Bladder (UCC)		2	gemcitabine-cisplatin (M17NIU); pembrolizumab		4	3		3	RAF1 amp; MDM2 amp		0	0			CDKN2A del; USP8 amp		66	3		9.69199	YES			2	tremelimumab (M18ICR); enfortumab vedotin (early access)	NO							No actionable standard-of-care biomarkers
547	Known primary tumour	Colorectum (Rectum)		1	CAPOX-B		5	4		2	FGFR1 amp; FLT3 amp		1	1	ERBB2 amp; KRAS absent		APC inact mut; TP53 inact mut		112	5.8		15.5072	YES			1	capecitabine-bevacizumab	NO							Ongoing response on previous treatment/complete remission
548	Known primary tumour	Lung (NSCLC)		0			6	1		1	KRAS act mut		0	0			STK11 inact mut; KEAP1 mut VUS; TP53 inact part del; CDKN2A del; SMARCA4 inact part del		57	2.7		-0.0328542	NO	Deceased		0		NO							Insufficient follow-up
549	Known primary tumour	Cervix		0			3	1		1	HRD+BRCA2 inact mut		0	0			HPV type 33; TERTp mut		87	3.3		15.9671	YES			2	carboplatin-paclitaxel-bevacizumab; cisplatin mono	NO							No actionable standard-of-care biomarkers
550	Known primary tumour	Oesophagus/stomach (Stomach)		3	FLOT; cisplatin-capecitabine; CAPOX		4	1		1	MAP2K4 del		0	0			TP53 inact mut; STAG2 inact mut; TGFBR2 inact part del		65	4.1		2.98973	NO	BSC		1	paclitaxel-ramucirumab	NO							Insufficient follow-up
551	Cancer of unknown primary	CUP (Pancreas)		1	gemcitabine-nab-paclitaxel		6	0		0			0	0			ARID1B inact mut; KRAS act mut; ZFHX3 mut VUS; TP53 inact mut; CDKN2A del; KRAS amp		66	4		12.7803	YES			3	gemcitabine-nab-paclitaxel (same); gemcitabine mono; FOLFIRINOX	NO							No actionable biomarkers detected
552	Cancer of unknown primary	CUP (Biliary tract)		0			3	1		1	BRAF V600E act mut		0	0			BAP1 inact mut; CDKN2A del		16	0.8		0.0328542	NO	Second opinion		0		NO							Insufficient follow-up
553	Known primary tumour	Soft tissue (Fibromyxoid sarcoma)		1	doxorubicine		3	0		0			0	0			EWSR1-CREB3L1 fus; CDKN2A del; DMD inact part del		35	1.6		15.2444	YES			1	pazopanib	NO							No actionable standard-of-care biomarkers
554	Known primary tumour	Breast (TNBC)		2	ddAC; capecitabine		5	1		1	CDK4 amp		0	0			BCL2L14-ETV6 fus; TP53 inact mut; ADAM30 amp; CD44 amp		82	6.3		1.08419	NO	Deceased		0		NO							Insufficient follow-up
556	Known primary tumour	Lung (NSCLC)		6	alectinib; lorlatinib; carboplatin-pemetrexed; paclitaxel-bevacizumab; lorlatinib retreatment; carboplatin-pemetrexed-lorlatinib		3	1		0			1	0	ALK fus		SF3B1 mut VUS; TP53 inact mut		46	2.7		0.328542	NO	Deceased		0		NO							Insufficient follow-up
557	Known primary tumour	Brain/CNS (Glioblastoma Multiforme)		3	temozolomide; bevacizumab; lomustine		2	1		1	PTEN inact part del		0	0			EGFR amp		32	1.9		1.31417	NO	Deceased		1	lomustine (same)	NO							Insufficient follow-up
558	Known primary tumour	Lung (NSCLC)		1	osimertinib (M18TATIN)		5	2		1	EGFR resist mut		1	0	EGFR act mut		TP53 inact mut; CDKN2A del; TML high		218	15		10.0534	YES			1	osimertinib-necitumumab (M19ORC)	YES	EGFR	osimertinib-necitumumab	Experimental trial	ORCHARD (M19ORC)	NCT03944772	II	Study treatment for standard-of-care biomarker
559	Cancer of unknown primary	CUP (Lung; NSCLC)		0			6	1		1	TML high		0	0			BAP1 inact mut; ARID2 inact mut; TP53 inact mut; FHIT inact part del; PTPRD inact part del		489	28.6		10.1191	YES			1	carboplatin-pemetrexed-nivolumab (M17FNN)	YES	TML	nivolumab	Experimental trial	M17FNN	NCT05742607	N/A	No actionable standard-of-care biomarkers
562	Known primary tumour	Colorectum (Sigmoid)		3	FOLFOX-B; FOLFIRI; irinotecan-cetuximab		5	4		2	TML high; CCND1 amp		1	1	BRAF V600E act mut; KRAS absent		TP53 inact mut; FGF3 coamp		147	9.6		0.427105	NO	Second opinion		0		NO							Insufficient follow-up
565	Known primary tumour	Soft tissue (Liposarcoma)		0			3	1		1	CDK4 amp		0	0			MDM2 amp; DDR2 amp		18	0.9		15.4743	YES			2	doxorubicine; abemaciclib (DRUP)	YES	CDK4	abemaciclib	Experimental trial	DRUP (M15DRU)		II	No actionable standard-of-care biomarkers
566	Known primary tumour	Breast (ER positive, Her2 negative)		5	4x ddAC+8x paclitaxel; tamoxifen; letrozol; fulvestrant-palbociclib; capecitabine		3	1		1	MAP2K4 loss		0	0			GATA3 inact mut; CDKN2A loss		79	4		14.8501	YES			1	paclitaxel	NO							No actionable standard-of-care biomarkers
567	Known primary tumour	Breast (ER positive, Her2 positive)		8	6xTCH; trastuzumab; tamoxifen; lapatinib-capecitabine; trastuzumab-pertuzumab-paclitaxel; fulvestrant-paclitaxel; TDM1-fulvestrant; trastuzumab-deruxtecan		6	4		4	TML high; PIK3CA act mut; NF1 inact mut; CCND1 amp		0	0			ERBB2 amp		247	9.4		-0.164271	NO	BSC		1	epirubicine-cyclofosfamide	NO							Insufficient follow-up
570	Known primary tumour	Mesothelioma		1	cisplatin-pemetrexed		2	0		0			0	0			KMT2C inact mut; CDKN2A inact del		30	1.5		13.8973	YES			1	lenvatinib-pembrolizumab (N19PEM PEMMELA)	NO							No actionable standard-of-care biomarkers
571	Known primary tumour	Bladder (UCC)		2	gemcitabine-cisplatin; pembrolizumab		6	1		1	TML high		0	0			CDKN2A inact mut; TP53 inact mut VUS; SMAD4 inact mut; FHIT inact part del; NF2 inact homoz disrup		161	9.3		4.23819	YES			0		NO							No actionable standard-of-care biomarkers
572	Known primary tumour	Breast (ER positive, Her2 negative)		8	4xddAC; tamoxifen; tamoxifen-LHRHa; fulvestrant; capecitabine; paclitaxel mono; carboplatin-gemcitabine; vinorelbine		4	2		1	CHEK2 inact mut		1	0	PIK3CA act mut		RB1 inact mut; TP53 inact mut		41	1.8		0.952772	NO	Other hospital referral		1	(alpelisib)	NO							Insufficient follow-up
573	Known primary tumour	Urothelial tract (UCC)		2	nivolumab-NKTR-214 (M19NEK); carboplatin-gemcitabine		8	2		2	AKT1 act mut; BRAF class III act mut		0	0			HRAS act mut; TERTp act mut; SF3B1 inact mut; KMT2D inact mut; EP300 inact mut; CDKN2A del		101	3.7		11.5975	YES			2	tremelimumab (M18ICR); enfortumab vedotin (early access)	NO							No actionable standard-of-care biomarkers
574	Known primary tumour	Uterus/endometrium		1	carboplatin-paclitaxel		6	1		1	MET amp		0	0			ARID1A inact mut; TP53 inact mut; ARGHAP35 inact mut; MYC amp; CCNE1 amp		32	1.3		14.7187	YES			2	CCS1477 (M21CCS); crizotinib (DRUP)	YES	MET	crizotinib	Experimental trial	DRUP (M15DRU)		II	No actionable standard-of-care biomarkers
575	Known primary tumour	Soft tissue (Leiomyosarcoma)		3	doxorubicine-DTIC; pazopanib; trabectedine		3	0		0			0	0			DAXX inact mut; RB1 inact part del; TP53 del		62	3.4		11.729	YES			1	MCL-145 (M19MCL)	NO							No actionable standard-of-care biomarkers
580	Known primary tumour	Breast (TNBC)		3	ddAC; carboplatin-paclitaxel; capecitabine		8	1		1	FGFR1 amp		0	0			TP53 inact mut; CSMD1 inact part del; ADAM30 amp; ZNF703 amp; ANK1 amp; IKBKB amp; PABPC1 amp		31	1.6		1.1499	NO	Deceased		0		NO							Insufficient follow-up
581	Known primary tumour	Ovary (Granulosa cell carcinoma)		1	carboplatin-paclitaxel		2	0		0			0	0			CHEK2 mut; TP53 inact mut		14	0.6		-0.0657084	NO	Deceased		0		NO							No actionable biomarkers detected
582	Known primary tumour	Lung (NSCLC)		3	gefitinib; osimertinib; afatinib-osimertinib		7	1		0			1	0	EGFR act mut		TERTp mut; EGFR T790m resist mut; EGFR resist mut; SMAD2 inact mut; CDKN2A del		57	3.4		15.0472	YES			1	afatinib-osimertinib (same)	NO							Ongoing response on previous treatment/complete remission
583	Known primary tumour	Lung (NSCLC)		2	carboplatin-pemetrexed-pembrolizumab; osimertinib		3	0		0			0	0			ERBB2 mut; TP53 inact mut; U2AF1 act mut VUS		122	4.7		1.24846	NO	Deceased		1	trastuzumab-deruxtecan (M20DEL)	NO							No actionable biomarkers detected
584	Cancer of unknown primary	CUP (Definitive CUP; possibly Colorectum)		0			3	2		1	PIK3CA act mut		0	1	KRAS absent		CDKN2A del; TGFBR2 del		65	3.6		0.197125	NO	Deceased		0		NO							Insufficient follow-up
585	Known primary tumour	Lung (NSCLC)		2	erlotinib; osimertinib		3	1		0			1	0	EGFR act mut		KRAS resist amp; CDKN2A loss		29	1.9		0.394251	NO	Other hospital referral		4	carboplatin-pemetrexed-pembrolizumab; carboplatin-pemetrexed; osimertinib retreatment; patritumab-deruxtecan (M19UNS)	NO							Insufficient follow-up
586	Known primary tumour	Head and neck (Oropharynx; BCC)		1	vismodigib		4	2		1	TMB high		1	0	PTCH1 inact mut		TP53 inact mut; TERTp mut; UV signature		3594	250		7.62218	YES			1	vismodigib (same)	NO							Standard-of-care biomarker was already treated before WGS
589	Cancer of unknown primary	CUP (Lung; NSCLC)		0			3	2		2	TML high; KRAS act mut		0	0			TP53 inact mut		344	27.1		14.3901	YES			4	carboplatin-pemetrexed-pembrolizumab; carboplatin-paclitaxel-pembrolizumab; pembrolizumab mono; paclitaxel-bevacizumab	NO							No actionable standard-of-care biomarkers
590	Known primary tumour	Lung (NSCLC)		1	carboplatin-pemetrexed-pembrolizumab		5	1		0			1	0	ERBB2 ins		FAT4 mut VUS; CDKN2A del; TP53 inact homoz disrup		40	1.8		10.5462	YES			3	pembrolizumab maintenance; paclitaxel-bevacizumab; afatinib	NO							Standard-of-care biomarker was already treated before WGS
591	Known primary tumour	Lung (NSCLC)		3	cisplatin-pemetrexed; crizotinib; alectinib		1	0		0			0	0			STK11 inact mut		74	5.5		8.24641	YES			1	crizotinib retreatment	NO							No actionable standard-of-care biomarkers
592	Known primary tumour	Colorectum (Rectum)		9	CCRT; CAPOX; capecitabine; CAPOX-B; capecitabine maintenance; panitumumab; CAPOX; Teysuno-oxaliplatin; TAS-102		4	2		1	TML high		0	1	KRAS absent		APC inact mut; TP53 inact mut; FBXW7 inact mut		279	20.5		1.87269	NO	Deceased		1	ipilimumab-nivolumab (DRUP)	YES	TML	ipilimumab-nivolumablumab	Experimental trial	DRUP (M15DRU)		II	Treated but less than 3 months follow-up
594	Known primary tumour	Head and neck (Nasopharynx; SCC)		0			3	0		0			0	0			NOTCH1 del; CDKN2A del; TP53 inact mut		23	0.8		18.3984	YES			0		NO							No actionable standard-of-care biomarkers
595	Cancer of unknown primary	CUP (Definitive CUP; possibly Anogenital)		0			4	1		1	PTEN inact mut		0	0			HPV type 16; KMT2D inact mut; KMT2C inact part del		73	3.4		4.50103	YES			0	(carboplatin-paclitaxel)	NO							No actionable standard-of-care biomarkers
596	Known primary tumour	Prostate		2	leuproreline; ODM201/placebo-docetaxel (M16ARA)		2	1		1	RAD51B loss no HRD		0	0			TMPRSS2-ERG fus		61	3.6		17.347	YES			3	carboplatin-cabazitaxel; carboplatin mono; olaparib (DRUP); carboplatin mono	YES	RAD51B	olaparib	Experimental trial	DRUP (M15DRU)		II	No actionable standard-of-care biomarkers
597	Known primary tumour	Lung (NSCLC)		3	carboplatin-gemcitabine; nivolumab; lenvatinib (DRUP)		7	3		3	TMB high; KRAS amp; FGFR1 fus;		0	0			FGFR1 amp; BAP1 inact mut; CDKN2A inact mut; TP53 inact mut		459	31.4		1.41273	NO	Deceased		1	lenvatinib (DRUP, same)	NO							Insufficient follow-up
598	Known primary tumour	Prostate		0			3	1		1	PTEN inact part del		0	0			TMPRSS2-ERG fus; TP53 inact homoz disrup		40	1.6		17.0185	YES			2	bicalutamide; gosereline	NO							No actionable standard-of-care biomarkers
599	Known primary tumour	Prostate		0			1	0		0			0	0			CSMD1 inact part del VUS		29	1.6		18.1684	YES			0		NO							No actionable standard-of-care biomarkers
600	Known primary tumour	Breast (TNBC)		2	4x ddAC+8x paclitaxel; letrozol		5	2		2	TML high; MAP3K1 inact mut		0	0			CDH1 inact mut; TP53 inact mut; FOXA1 act mut		336	12.2		17.5113	YES			2	fulvestrant-palbociclib; capecitabine	NO							No actionable standard-of-care biomarkers
601	Known primary tumour	Cervix		2	carboplatin-paclitaxel-bevacizumab; bevacizumab maintenance		6	0		0			0	0			HPV type 18; ERBB3 act mut; STK11 del; MAP2K7 del; KEAP1 del; DNM2 del; SMARCA4 del		65	2.1		0.525667	NO	Other hospital referral		0		NO							No actionable biomarkers detected
602	Known primary tumour	Soft tissue (Epithelioid haemangioendothelioma)		0			1	0		0			0	0			WWTR1-CAMTA1 fus		59	2.8		3.48255	YES			1	sirolimus	NO							No actionable standard-of-care biomarkers
603	Known primary tumour	Anus (SCC)		2	CCRT: carboplatin-paclitaxel		1	0		0			0	0			HPV type 33		39	1.9		2.20123	NO	Second opinion		0		NO							No actionable biomarkers detected
604	Known primary tumour	Prostate		1	ADT-docetaxel		5	1		1	PTEN inact homoz disrup		0	0			TMPRSS2-ERG fus; TP53 inact mut; RB1 inact part del; APC inact mut		74	3.7		1.67556	NO	Other hospital referral		1	cabazitaxel	NO							Insufficient follow-up
605	Known primary tumour	Colorectum (Caecum)		1	CAPOX-B (CAIRO 6)		3	2		1	BRAF class III act mut		0	1	KRAS absent		TP53 inact mut; APC inact mut		96	6		17.9384	YES			1	FOLFIRI-B	NO							Ongoing response on previous treatment/complete remission
606	Known primary tumour	Urothelial tract (UCC)		2	carboplatin-gemcitabine; pembrolizumab		3	1		1	EGFR amp		0	0			TP53 inact mut; RB1 inact part del		114	5.4		6.93224	YES			1	paclitaxel-tremelimumab-durvalumab (ICRA)	NO							No actionable standard-of-care biomarkers
608	Known primary tumour	Lung (NSCLC)		1	crizotinib		4	2		2	NF1 inact mut; ROS1 fus		0	0			TERT act mut; TP53 inact mut		100	5		10.2834	YES			2	repotrectinib (M19TRI); lorlatinib (compassionate use)	YES	ROS1	repotrectinib; lorlatinib	Experimental trial: Compassionate use programme	TRIDENT-1 (M19TRI)	NCT03093116	I/II	No actionable standard-of-care biomarkers
609	Known primary tumour	Mesothelioma		1	carboplatin-pemetrexed		6	0		0			0	0			BAP1 inact mut; NF2 inact part del; CDKN2A del; USP32 amp; PPM1D amp; CD79B amp		32	1.2		17.5113	YES			1	lenvatinib-pembrolizumab (N19PEM PEMMELA)	NO							No actionable standard-of-care biomarkers
610	Known primary tumour	Oesophagus/stomach (GEJ; intestinal type carcinoma)		1	CAPOX		4	1		1	KRAS amp		0	0			CDKN2A inact mut; TP53 inact mut; DMD inact par del		127	8.9		15.4415	YES			3	FOLFOX; FOLFOX-nivolumab; paclitaxel-ramucirumab	NO							No actionable standard-of-care biomarkers
611	Known primary tumour	Soft tissue (Leiomyosarcoma)		0			4	0		0			0	0			ATRX inact mut; RB1 inact del; TP53 inact del; DPYD low metaboliser		50	3.2		17.9713	YES			0		NO							No actionable standard-of-care biomarkers
612	Known primary tumour	Breast (TNBC)		3	ddAC-CP; paclitaxel-atezolizumab (tripleB); atezolizumab mono		5	1		1	CD274 amp		0	0			TP53 inact mut; LRP1B inact part del; MCL1 amp; JAK2 amp		89	3.2		2.89117	NO	Deceased		0		NO							Insufficient follow-up
613	Known primary tumour	Breast (ER positive, Her2 negative)		1	letrozol		2	2		1	MAP3K1 inact mut		1	0	PIK3CA act mut				24	1.1		17.0185	YES			1	letrozole	NO							Ongoing response on previous treatment/complete remission
615	Cancer of unknown primary	CUP (Lung; NSCLC)		0			8	2		2	ERBB2 act mut; TMB high		0	0			TP53 inact mut; PMS2 mono-allelic; PMS2 VUS; SMARCA4 inact mut; FGF3 amp; FOXA1 amp		1736	124.4		0.328542	NO	Second opinion		1	(carboplatin-pemetrexed-pembrolizumab)	NO							Insufficient follow-up
616	Known primary tumour	Breast (ER positive, Her2 negative)		4	4xddAC; anastrozol; docetaxel-capecitabine; tamoxifen		2	1		1	FGFR1 amp		0	0			TP53 inact		65	2.7		12.7474	YES			2	fulvestrant-palbociclib; paclitaxel-pembrolizumab (M21KNB)	NO							No actionable standard-of-care biomarkers
617	Known primary tumour	Breast (ER positive, Her2 negative)		2	tamoxifen; anastrozol-gosereline		2	2		1	ERBB2 act mut		1	0	PIK3CA act mut				31	1		13.8973	YES			2	fulvestrant-ribociclib; fulvestrant-palbociclib	NO							Ongoing response on previous treatment/complete remission
618	Known primary tumour	Cervix		0			2	2		2	TMB high; PIK3CA act mut		0	0			HPV absent		368	14.9		14.7515	YES			1	carboplatin	NO							No actionable standard-of-care biomarkers
619	Known primary tumour	Breast (ER positive, Her2 negative)		4	tamoxifen; capecitabine; letrozol; fulvestrant-ribociclib		6	2		2	TML high; PIK3CA act mut		0	0			CHEK2 mono-allelic inact mut; RAD50 mono-allelic inact mut; RB1 inact mut; BRCA mono-allelic inact mut		3187	107.7		14.3573	YES			2	exemestane-everolimus; pembrolizumab (M15KEY)	YES	TML	pembrolizumab	Experimental trial	KEYNOTE 158	NCT02628067	II	No actionable standard-of-care biomarkers
620	Known primary tumour	Soft tissue (Leiomyosarcoma)		3	doxorubicine-DTIC; trabectedine; pazopanib		2	0		0			0	0			TP53 inact mut; RB1 inact homoz disrup		67	3.6		3.5154	YES			1	pazopanib (same)	NO							No actionable standard-of-care biomarkers
621	Known primary tumour	Soft tissue (Leiomyosarcoma)		0			2	2		2	TML high; MSI no substrate		0	0					648	55.1		0.0328542	NO	Deceased		1	dacarbazine	NO							Insufficient follow-up
623	Known primary tumour	Ovary (Borderline/low grade serous carcinoma)		1	carboplatin-paclitaxel; letrozol; tamoxifen		2	1		1	NF1 inact homoz disrup		0	0			CDKN2A inact del		22	0.9		7.45791	YES			1	trametinib (DRUP)	YES	NF1	trametinib	Experimental trial	DRUP (M15DRU)		II	No actionable standard-of-care biomarkers
624	Known primary tumour	Lung (Carcinoid; atypical carcinoid)		2	somatostatine analog; everolimus		1	1		1	PTEN inact homoz disrup		0	0					32	1.9		14.5873	YES			1	temozolomide	NO							No actionable standard-of-care biomarkers
625	Cancer of unknown primary	CUP (Definitive CUP; possibly Pancreas)		0			4	2		2	PTEN inact mut; BRAF fus		0	0			MEN1 inact mut; CDKN2A del		20	1.8		0.131417	NO	Second opinion		0		NO							Insufficient follow-up
626	Cancer of unknown primary	CUP (Prostate)		2	Zoladex; bicalutamide		2	1		1	PTEN loss		0	0			TMPRSS2-ERG fus		109	4.4		1.37988	NO	Deceased		0		NO							Insufficient follow-up
627	Known primary tumour	Bone (Osteosarcoma)		0			2	0		0			0	0			TP53 del; RB1 del		70	4		4.20534	YES			1	pazopanib	NO							No actionable standard-of-care biomarkers
628	Known primary tumour	Soft tissue (High grade spindle cell/pleomorphic sarcoma)		1	doxorubicine-ifosfamide		2	0		0			0	0			RB1 del; TP53 del		34	1.9		14.6201	YES			1	pazopanib	NO							No actionable standard-of-care biomarkers
630	Known primary tumour	Head and neck (Pharynx; SCC)		0			1	1		1	CHEK2 inact mut		0	0					86	4.6		4.07392	YES			2	carboplatin; nivolumab	NO							No actionable standard-of-care biomarkers
631	Known primary tumour	Mesothelioma		2	4x cisplatin-carboplatin-pemetrexed; 6x pemetrexed mono		5	2		2	RET act mut; FANCA inact mut		0	0			TP53 inact mut; BAP1 inact part del; CDKN2A inact del		26	1		13.8973	YES			1	lenvatinib-pembrolizumab (N19PEM PEMMELA)	NO							No actionable standard-of-care biomarkers
632	Known primary tumour	Breast (ER positive, Her2 negative)		5	tamoxifen; fulvestrant; letrozol-ribociclib; exemestane-everolimus; capecitabine		1	1		1	AKT1 act mut		0	0					42	1.7		13.4702	YES			1	capecitabine-anastrozol	NO							No actionable standard-of-care biomarkers
633	Known primary tumour	Breast (ER positive, Her2 negative)		1	letrozol		3	2		1	FGFR1 amp		1	0	PIK3CA act mut		TP53 inact mut		42	1.7		13.2402	YES			1	fulvestrant-ribociclib	NO							Ongoing response on previous treatment/complete remission
634	Cancer of unknown primary	CUP (Lung; NSCLC)		1	carboplatin-paclitaxel, CAPOX		6	2		2	TML high; KRAS act mut		0	0			TP53 inact mut; NF2 inact mut; CDKN2A del; smoking signature		215	16.3		1.97125	NO	Deceased		1	pembrolizumab	NO							Insufficient follow-up
637	Known primary tumour	Lung (NSCLC)		0			3	1		0			1	0	EGFR act mut		EGFR T790M mut; TP53 inact mut		30	1.4		14.3901	YES			1	osimertinib	YES	EGFR	osimertinib	Reimbursed care				Actionable standard-of-care biomarker was treated
638	Known primary tumour	Oesophagus/stomach (Oesophagus)		1	carboplatin-paclitaxel		2	1		0			1	0	ERBB2 amp		TP53 inact mut		121	7.8		5.91376	YES			1	CAPOX-trastuzumab; trastuzumab-BTR4017A (M21BTR)	YES	ERBB2	trastuzumab	Reimbursed care				Actionable standard-of-care biomarker was treated
639	Known primary tumour	Cervix (SCC)		0			0	0		0			0	0					86	3.3		3.25257	YES			1	carboplatin-paclitaxel-bevacizumab	NO							No actionable standard-of-care biomarkers
640	Known primary tumour	Ovary		5	carboplatin-paclitaxel; carboplatin-gemcitabine-bevacizumab; bevacizumab mono; carboplatin-paclitaxel; niraparib		0	0		0			0	0					26	1.6		8.93634	YES			0		NO							No actionable standard-of-care biomarkers
641	Known primary tumour	Breast (ER positive, Her2 negative)		2	6x TAC+tamoxifen; letrozol		4	0		0			0	0			CDKN2A inact mut; TERT amp; IL7R amp; LKMBRD2 amp		28	1		13.9302	YES			1	fulvestrant-ribociclib	NO							No actionable standard-of-care biomarkers
642	Known primary tumour	Breast (ER positive, Her2 negative)		5	ddAC+paclitaxel; tamoxifen; letrozol; fulvestrant-palbociclib; capecitabine		3	3		2	TML high; CCND1 amp		1	0	PIK3CA act mut				160	6.3		13.9959	YES			2	fulvestrant-alpelisib; paclitaxel mono	YES	PIK3CA	alpelisib	Reimbursed care				Actionable standard-of-care biomarker was treated
643	Cancer of unknown primary	CUP (Definitive CUP)		1	carboplatin-paclitaxel		3	1		1	CCND1 amp		0	0			TP53 inact mut; CDKN2A inact part del		110	5.6		0.229979	NO	Second opinion		0		NO							Insufficient follow-up
645	Known primary tumour	Kidney (Chromophobic RCC)		0			0	0		0			0	0					22	0.9		0.262834	NO	Second opinion		0		NO							No actionable biomarkers detected
646	Known primary tumour	Prostate (Sarcomatoid carcinoma)		0			6	2		2	PTEN inact part del; PPP2R2A del		0	0			MYC amp; RB1 inact mut; TP53 inact mut; TMPRSS2-ERG fus		28	1.4		0.0657084	NO	Second opinion		0		NO							Insufficient follow-up
647	Known primary tumour	Ovary (High grade serous carcinoma)		0			4	2		1	TML high		1	0	HRD (known BRCA1 hypermethylation)		TP53 inact mut; TCF12 inact part del VUS		168	7.5		13.7659	YES			2	carboplatin-paclitaxel; niraparib	YES	HRD	niraparib	Reimbursed care				Actionable standard-of-care biomarker was treated
648	Known primary tumour	Soft tissue (Spindle cell sarcoma)		3	doxorubicine-DTIC; pazopanib; trabectedine		2	1		1	PTEN loss		0	0			TP53 mut		101	6		1.74127	NO	Deceased		1	trabectedine (same)	NO							Insufficient follow-up
649	Known primary tumour	Breast (ER positive, Her2 positive)		7	6xPTC; 4xFEC-T; vinorelbine-trastuzumab-pertuzumab; exemestane; T-DM1; capecitabine-trastuzumab; Teysuno		3	3		1	ERBB2 act mut		2	0	ERBB2 amp; PIK3CA act mut				36	1.5		13.5688	YES			1	trastuzumab-capecitabine-tucatinib	YES	ERBB2	trastuzumab-tucatinib	Reimbursed care				Actionable standard-of-care biomarker was treated
650	Known primary tumour	Pancreas (Neuro-endocrine; NEC)		0			3	2		2	NF1 loss; RNF43 loss		0	0			TP53 inact mut		81	5.7		13.9302	YES			0		NO							No actionable standard-of-care biomarkers
651	Known primary tumour	Breast (ER positive, Her2 negative)		6	6x TAC+tamoxifen; letrozol; 4x docetaxel-cyclofosfamide; fulvestrant-palbociclib; capecitabine; exemestane-everolimus; paclitaxel.		3	1		0			1	0	PIK3CA act mut		TP53 inact mut; SRC amp		55	2.5		1.24846	NO	Second opinion		1	paclitaxel (same)	NO							Insufficient follow-up
652	Known primary tumour	Breast (Acinic cell TNBC)		0			6	2		2	HRD no substrate; NF1 inact homoz disrup		0	0			TP53 inact mut; SMAD2 inact homoz disrup; PBRM1 inact homoz disrup; KDM6A inact homoz disrup		87	4.3		13.7659	YES			2	capecitabine; talazoparib (DRUP)	YES	HRD	talazoparib	Experimental trial	DRUP (M15DRU)		II	No actionable standard-of-care biomarkers
653	Cancer of unknown primary	CUP (Pancreas)		0			5	1		1	KRAS act mut		0	0			CDKN2A inact mut; TP53 inact mut; SMAD4 inact mut; MYC amp		18	1.4		-0.558522	NO	Deceased		0		NO							Insufficient follow-up
654	Known primary tumour	Lung (SCLC)		0			2	1		1	PTEN loss		0	0			TP53 inact mut		29	1.6		4.40246	YES			1	cisplatin-etoposide	NO							No actionable standard-of-care biomarkers
656	Known primary tumour	Lung (NSCLC)		3	afatinib; bevacizumab; osimertinib		7	2		1	NF1 inact mut		1	0	EGFR act mut		TP53 mut; APC mut; KEAP 1 mut; NF2 inact mut		116	8.3		0.197125	NO	Deceased		1	osimertinib (same)	NO							Insufficient follow-up
657	Known primary tumour	Breast (TNBC)		4	carboplatin-paclitaxel; paclitaxel mono; cisplatin-nivolumab (TONIC2); capecitabine		9	3		3	HRD no substrate; PTEN inact homoz disrup; PIK3CA amp		0	0			TP53 inact mut; FAT1 inact mutl; CTNNA1 inact mut; MAP3K13 amp; AIM1 amp; RB1 inact homoz disrup		126	5.9		0.919918	NO	Deceased		1	AC	NO							Insufficient follow-up
658	Known primary tumour	Soft tissue (Desmoplastic small round cell tumour		0			1	0		0			0	0			EWSR1-WT1 fus		17	1		11.3347	YES			4	VIDE; VAI; pazopanib; irinotecan-vincristine	NO							No actionable standard-of-care biomarkers
659	Cancer of unknown primary	CUP (Definitive CUP; possibly Bladder; signet ring)		0			4	0		0			0	0			KMT2D inact mut; TP53 inact mut; IDH2 amp; PRKACA amp		43	2.4		1.9384	NO	Second opinion		0		NO							No actionable biomarkers detected
660	Known primary tumour	Soft tissue (Leiomyosarcoma)		0			3	1		1	HRD+BRCA2 loss		0	0			RB1 loss; TP53 inact mut		70	3.7		13.5688	YES			2	doxorubicine mono; trabectedine	NO							No actionable standard-of-care biomarkers
661	Known primary tumour	Soft tissue (Liposarcoma; dedifferentiated)		0			6	1		1	CDK4 amp		0	0			MDM2 amp; MCL1 amp; SETBP1 amp; ATRX inact part del; HMGA2-GLCCI1 fus		22	1.6		12.1232	YES			0		NO							No actionable standard-of-care biomarkers
662	Cancer of unknown primary	CUP (Skin; Merkel cell carcinoma)		0			10	1		1	TML high		0	0			UV signature; RB1 inact mut; TP53 inact mut; NF1 inact mut; ZRSR2 inact mut VUS; ATP2B3 inact mut VUS; CSF3R amp; MYCL amp; MPL amp		1923	81.9		13.7659	YES			0		NO							No actionable standard-of-care biomarkers
663	Known primary tumour	Soft tissue (Angiosarcoma)		1	paclitaxel		4	0		0			0	0			HRAS act mut; ESP28 inact mut; NOTCH1 inact part del; MYC amp		52	2.5		3.5154	YES			1	paclitaxel (same)	NO							No actionable standard-of-care biomarkers
664	Known primary tumour	Soft tissue (Liposarcoma)		5	doxorubicine-olaratumab; olaratumab mono; ifosfamide (ANITA); eribuline; trabectedine		2	2		2	CDK4 amp; MDM2 amp		0	0					31	1		4.13963	YES			1	abemaciclib (DRUP)	YES	CDK4	abemaciclib	Experimental trial	DRUP (M15DRU)		II	No actionable standard-of-care biomarkers
665	Known primary tumour	Ovary (High grade papillary serous carcinoma)		1	carboplatin-paclitaxel;		2	1		1	KRAS act mut		0	0			CDKN2A inact splice mut		12	0.6		0	NO	Second opinion		0		NO							Insufficient follow-up
666	Known primary tumour	Mesothelioma		0			1	0		0			0	0			BAP1 loss		22	0.6		13.1088	YES			0		NO							No actionable standard-of-care biomarkers
669	Known primary tumour	Urothelial tract (UCC)		3	cisplatin/carboplatin-gemcitabine; pembrolizumab; carboplatin-gemcitabine retreatment		2	1		1	HRD no substrate		0	0			TP53 inact mut		105	6.1		0.131417	NO	Other hospital referral		0		NO							Insufficient follow-up
670	Known primary tumour	Lung (NSCLC)		1	pralsetinib (BLU667); selpercatinib; carboplatin-pemetrexed; carboplatin-paclitaxel		5	2		0			2	0	RET fus; BRAF V600E act mut		TP53 inact mut; CDKN2A del; SMARCA4 inact part del		113	5		1.51129	NO	Deceased		1	dabrafenib-trametinibetinib	YES	BRAF	dabrafenib-trametinibetinib	Reimbursed care				Treated but less than 3 months follow-up
671	Known primary tumour	Breast (ER negative, Her2 positive)		0			7	4		2	CCND3 amp; CDK6 amp		2	0	PIK3CA act mut; ERBB2 amp		VEGFA amp; TP53 mut; FOXA2 amp		65	3.2		12.6489	YES			1	paclitaxel-trastuzumab-pertuzumab	YES	ERBB2	trastuzumab	Reimbursed care				Actionable standard-of-care biomarker was treated
672	Known primary tumour	Breast (TNBC)		3	carboplatin-atezolizumab-cyclofosfamide (M13TNB); atezolizumab mono; carboplatin-atezolizumab-cyclofosfamide retreatment		7	5		5	HRD no substrate; PIK3R1 inact mut; PTEN homoz disrup; MYC amp; BRAF fus		0	0			TP53 inact mut; CHD4 amp		99	4.6		4.17248	YES			3	capecitabine; AC; paclitaxel	NO							No actionable standard-of-care biomarkers
673	Cancer of unknown primary	CUP (Definitive CUP; possibly Ovary; high grade serous carcinoma)		0			6	2		2	HRD no substrate; BRAF fus		0	0			KMT2C inact mut; TP53 inact mut; MYC amp; TG amp		50	2.6		17.5113	YES			2	carboplatin-paclitaxel; trametinib (DRUP)	YES	BRAF	trametinib	Experimental trial	DRUP (M15DRU)		II	No actionable standard-of-care biomarkers
674	Known primary tumour	Penis		1	atezolizumab		4	0		0			0	0			HPV type 16; TGFBR2 inact part del; STK11 inact part del; XRCC1 amp		37	1.7		8.90349	YES			0		NO							No actionable standard-of-care biomarkers
676	Known primary tumour	Lung (NSCLC)		0			5	4		2	MDM2 amp; CDK4 amp		2	0	MET exon 14 skipping act mut; MET amp		RBM10 inact mut		102	5		13.5359	YES			1	capmatinib	YES	MET	capmatinib	Reimbursed care				Actionable standard-of-care biomarker was treated
677	Known primary tumour	Kidney (RCC)		2	nivolumab; cabozantinib		1	0		0			0	0			MITF amp VUS		14	0.7		0.328542	NO	Second opinion		0		NO							No actionable biomarkers detected
678	Known primary tumour	Colorectum (Appendix)		0			2	2		1	KRAS act mut		1	0	KRAS present		TP53 inact mut		44	2.3		13.1088	YES			1	CAPOX	YES	KRAS present	no EGFR inhibitor	Reimbursed care				Actionable standard-of-care biomarker was treated
679	Known primary tumour	Breast (TNBC)		3	ddAC+paclitaxel; capecitabine; carboplatin-capecitabine		3	2		2	PIK3R1 inact mut; NF1 inact mut		0	0			CDKN2A del		38	2.3		13.7988	YES			1	RO7284755-atezolizumab	NO							No actionable standard-of-care biomarkers
680	Known primary tumour	Prostate (Neuro-endocrine; NEC)		0			5	0		0			0	0			TMPRSS2-ERG fus; TP53 inact mut; RB1 inact part del; NCOA part amp; MYC amp		27	1.2		2.33265	NO	Second opinion		1	cisplatin-etoposide	NO							No actionable biomarkers detected
681	Known primary tumour	Oesophagus/stomach (Oesophagus)		1	FLOT		2	0		0			0	0			TP53 inact mut; MAP2K4 mut VUS		114	6.2		3.35113	YES			1	FLOT (same)	NO							No actionable standard-of-care biomarkers
682	Known primary tumour	Skin adnex (SCC)		1	carboplatin-paclitaxel		8	2		2	TML high; KRAS act mut		0	0			UV signature; TERTp act mut VUS; CDKN2A inact mut; TP53 inact mut; DDX3X inact mut VUS; PTPRD inact part del		915	56.4		13.5031	YES			1	carboplatin-paclitaxel (same)	NO							No actionable standard-of-care biomarkers
683	Known primary tumour	Cervix		0			1	0		0			0	0			HPV type 18		48	2.6		1.31417	NO	Other hospital referral		0		NO							No actionable biomarkers detected
684	Known primary tumour	Teratoma (Immature extraovary teratoma)		1	3x BEP		2	2		2	CDK4 amp; MDM2 amp		0	0					44	2.1		10.5791	YES			1	doxorubicine-ifosfamide	NO							No actionable standard-of-care biomarkers
685	Known primary tumour	Breast (ER positive, Her2 negative)		5	3x FEC; anastrozol; tamoxifen; ddAC+paclitaxel; paclitaxel mono		2	2		1	MAP3K1 inact mut		1	0	PIK3CA act mut				33	1.5		9.23203	YES			1	fulvestrant-palbociclib	NO							Ongoing response on previous treatment/complete remission
688	Known primary tumour	Lung (NSCLC)		2	osimertinib; erlotinib		2	1		0			1	0	EGFR act mut		EGFR T790M resist mut		67	2.8		9.23203	YES			1	erlotinib (same)	NO							Standard-of-care biomarker was already treated before WGS
690	Known primary tumour	Soft tissue (Spindle cell sarcoma)		0			2	0		0			0	0			DPYD inact part del; CDKN2A del		40	2.5		13.2731	YES			1	doxorubicine	NO							No actionable standard-of-care biomarkers
692	Cancer of unknown primary	CUP (Definitive CUP; possibly Head and neck)		0			1	0		0			0	0			HPV type 16		70	2.1		13.2731	YES			1	cisplatin	NO							No actionable biomarkers detected
693	Known primary tumour	Breast (TNBC)		1	ddAC+paclitaxel		7	3		3	HRD+RAD51B inact part del; CREBBP inact part del; PTEN inact homoz disrup		0	0			BCL2L14-ETV6 fus; NTRK1 amp; CCNE1 amp		106	4.9		1.54415	NO	Deceased		0		NO							Insufficient follow-up
694	Known primary tumour	Breast (TNBC)		5	ddAC; capecitabine; pembrolizumab+CD27 agonist (M17MPE); pembrolizumab mono; paclitaxel mono; carboplatin-gemcitabine		4	3		3	PIK3R1 act mut; PTEN inact part del; NF1 inact homoz disrup		0	0			TP53 inact mut		73	3.8		10.8747	YES			2	carboplatin-gemcitabine (same); intrahepatic mitomycin-C	NO							No actionable standard-of-care biomarkers
696	Cancer of unknown primary	CUP (Definitive CUP; possibly Lower GI)		0			4	4		3	CHEK2 inact mut; MYC amp; CD274 amp		0	1	KRAS absent		TP53 inact mut		119	7.3		0.722793	NO	Second opinion		1	FOLFOX	NO							Insufficient follow-up
698	Known primary tumour	Colorectum (Caecum; signet ring)		0			1	1		0			0	1	KRAS absent		TP53 inact mut VUS		11	0.4		13.0103	YES			2	FOLFOX-bevacizumab; capecitabine-bevacizumab	NO							Standard-of-care biomarker was already treated before WGS
699	Known primary tumour	Melanoma		0			5	2		2	MDM2 amp; PDGFRA amp		0	0			TMB high; TERT mut; CDKN2A inact del		104	14		2.39836	NO	Deceased		1	ipilimumab-nivolumab	NO							Insufficient follow-up
700	Known primary tumour	Ovary (High grade clear cell carcinoma)		5	carboplatin-paclitaxel; carboplatin-gemcitabine-bevacizumab; bevacizumab mono; paclitaxel mono; Caelyx		2	2		2	KRAS mut; PIK3R1 act mut		0	0					59	2.5		7.68789	YES			0		NO							No actionable standard-of-care biomarkers
701	Cancer of unknown primary	CUP (Definitive CUP; possibly Prostate)		3	gemcitabine-cisplatin; nivolumab; docetaxel		3	1		1	ARID1A inact mut		0	0			NDRG1-MYC fus; CDKN2A del		88	4.9		1.11704	NO	Second opinion		1	docetaxel (same)	NO							Insufficient follow-up
703	Known primary tumour	Lung (NSCLC)		1	carboplatin-paclitaxel-atezolizumab-bevacizumab		0	0		0			0	0					29	1.4		12.7803	YES			2	carboplatin-paclitaxel-atezolizumab-bevacizumab (same); atezolizumab mono	NO							No actionable standard-of-care biomarkers
704	Known primary tumour	Mesothelioma		1	carboplatin-pemetrexed		4	0		0			0	0			BAP1 mut VUS; NF2 inact mut; CDKN2A del; ARID2 del		42	1.5		0.492813	NO	Second opinion		0		NO							No actionable biomarkers detected
705	Known primary tumour	Liver (Atypical HCC)		0			4	1		1	PTEN inact part del		0	0			TERT act mut; RB1 inact mut; TP53 inact mut		61	3.7		0.525667	NO	Second opinion		0		NO							Insufficient follow-up
707	Cancer of unknown primary	CUP (Lung; NSCLC)		0			4	2		2	HRD+BRCA1 inact mut; MAP3K1 inact homoz disrup		0	0			TP53 inact mut; CDKN2A del		117	5.7		0.229979	NO	BSC		0		NO							Insufficient follow-up
710	Known primary tumour	Oesophagus/stomach (Stomach)		2	CAPOX-trastuzumab; ramucirumab-paclitaxel		4	4		3	ATM inact mut; CDK6 amp; MDM2 amp		1	0	ERBB2 amp				35	1.8		1.97125	NO	Deceased		0		NO							Insufficient follow-up
711	Known primary tumour	Lung (NSCLC)		2	erlotinib; osimertinib		4	3		1	TML high		2	0	EGFR act mut; EGFR act resist mut		TP53 part inact mut		162	9.4		12.5503	YES			1	afatinib	YES	EGFR	afatinib	Reimbursed care				Actionable standard-of-care biomarker was treated
712	Cancer of unknown primary	CUP (Definitive CUP; possibly Breast)		0			5	2		2	BRCA1 inact mut no HRD; PIK3CA inact mut		0	0			CDH1 inact mut; HRAS act mut; HRAS amp		42	1.6		0.657084	NO	Second opinion		0		NO							Insufficient follow-up
713	Known primary tumour	Soft tissue (Spindle cell sarcoma)		0			2	1		1	NF1 inact mut		0	0			CDKN2A del		15	0.9		12.9446	YES			0		NO							No actionable standard-of-care biomarkers
714	Known primary tumour	Lung (NSCLC)		1	pembrolizumab-adagrasib (M20KRY)		3	2		2	TML high; KRAS act mut		0	0			TP53 inact mut		344	23.9		8.1807	YES			2	carboplatin-pemetrexed; TIL	NO							No actionable standard-of-care biomarkers
715	Cancer of unknown primary	CUP (Lung; NSCLC)		1	carboplatin-paclitaxel-pembrolizumab		4	1		1	KRAS act mut		0	0			BAP1 inact mut; CDKN2A inact mut; TP53 inact mut		120	8.6		1.74127	NO	BSC		1	sotorasib	YES	KRAS	sotorasib	Experimental trial: Compassionate use programme				Treated but less than 3 months follow-up
716	Known primary tumour	Prostate		2	Pamorelin; enzalutamide		3	2		2	AR amp; ATM inact splice mut		0	0			TMPRSS2-ERG fus		50	2.6		12.2218	YES			1	talazoparib (DRUP)	YES	ATM	talazoparib	Experimental trial	DRUP (M15DRU)		II	No actionable standard-of-care biomarkers
717	Known primary tumour	Ovary (Serous/papillary borderline carcinoma)		0			2	0		0			0	0			RAD50 part inact mut; KRAS act mut		17	0.9		12.7474	YES			0		NO							No actionable standard-of-care biomarkers
718	Known primary tumour	Lung (Carcinoid; atypical carcinoid)		0			0	0		0			0	0					21	0.6		12.4846	YES			0		NO							No actionable standard-of-care biomarkers
721	Known primary tumour	Breast (ER positive, Her2 negative)		2	tamoxifen; letrozol-ribociclib		3	1		1	MAP2K4 inact mut		0	0			ESR1 resist mut; GATA3 inact mut		53	2		11.8604	YES			3	fulvestrant; capecitabine; paclitaxel	NO							No actionable standard-of-care biomarkers
722	Known primary tumour	Lung (NSCLC)		2	osimertinib; mobocertinib		2	1		0			1	0	EGFR act mut		ATM inact mut; STK11 mut VUS		2	0.1		12.7474	YES			1	carboplatin-pemetrexed	NO							Standard-of-care biomarker was already treated before WGS
723	Known primary tumour	Breast (TNBC)		2	ddAC; capecitabine		5	2		2	HRD no substrate; PTEN inact homoz disrup		0	0			TP53 inact mut; PPP2R3B del; SPEN inact homoz disrup		87	3.7		3.154	YES			1	capecitabine	NO							No actionable standard-of-care biomarkers
724	Known primary tumour	Lung (LCNEC)		1	erlotinib		1	0		0			0	0			ARID1A inact mut		51	2.2		12.2218	YES			1	erlotinib (same)	NO							No actionable standard-of-care biomarkers
725	Known primary tumour	Lung (Carcinoid; atypical carcinoid)		0			1	1		1	ARID1A inact mut		0	0					26	1.4		12.1561	YES			1	capecitabine-temozolomide	NO							No actionable standard-of-care biomarkers
726	Known primary tumour	Prostate		6	Pamorelin; bicalutamide; abirateron; docetaxel; cabazitaxel; enzalutamide		3	1		1	PTEN loss		0	0			APC inact mut; TP53 inact homoz disrup; TMPRSS2-ERG fus		59	2.5		3.67967	YES			1	alpelisib (DRUP)	YES	PTEN	alpelisib	Experimental trial	DRUP (M15DRU)		II	No actionable standard-of-care biomarkers
727	Known primary tumour	Lung (Carcinoid; atypical carcinoid)		1	everolimus		1	1		1	ATM inact mut		0	0					47	3.8		12.0575	YES			0		NO							No actionable standard-of-care biomarkers
728	Known primary tumour	Colorectum (Colon)		0			8	2		1	KRAS act mut		1	0	KRAS present		TP53 inact mut; KMT2D inact mut; SMARCB1 inact mut; CDKN2A del; VEGFA amp; KRAS amp; TAF8-TFEBp fus		45	3.3		3.21971	YES			1	FOLFOXIRI-B	YES	KRAS present	no EGFR inhibitor	Reimbursed care				Actionable standard-of-care biomarker was treated
729	Cancer of unknown primary	CUP (Colorectum; Colon)		1	cetuximab		3	2		1	TMB high		0	1	KRAS absent		APC inact mut; TP53 inact mut		237	15		1.41273	NO	Second opinion		1	cetuximab (same)	NO							Insufficient follow-up
730	Known primary tumour	Lung (NSCLC)		0			4	3		3	TMB high; ARID1A inact mut; PTEN inact splice mut		0	0			TP53 inact mut		244	16.7		12.1561	YES			1	pembrolizumab	NO							No actionable standard-of-care biomarkers
732	Cancer of unknown primary	CUP (Lung; NSCLC)		2	carboplatin-paclitaxel; durvalumab		5	1		1	TML high		0	0			TP53 inact mut; CDKN2A inact mut; SMARCA4 inact mut; smoking signature		685	43.6		15.4086	YES			1	pembrolizumab	NO							No actionable standard-of-care biomarkers
733	Known primary tumour	Uterus/endometrium		3	carboplatin-paclitaxel; doxorubicine; anastrozol		5	4		4	HRD+RAD51D mut; KRAS act mut; NF1 inact part del		0	0					78	3.5		0.361396	NO	Second opinion		0		NO							Insufficient follow-up
734	Known primary tumour	Cervix		0			3	2		2	TML high; PIK3CA act mut		0	0			HPV type 16		292	13		12.0246	YES			3	cisplatin-paclitaxel-bevacizumab; bevacizumab mono; MK-7684A-pembrolizumab (M21VIP)	NO							No actionable standard-of-care biomarkers
737	Cancer of unknown primary	CUP (Definitive CUP; possibly Uterus/endometrium)		0			5	2		2	PIK3CA act mut; ATM inact mut		0	0			ARID1A inact mut; KMT2C inact mut; CDKN2A del		46	2.1		0.492813	NO	Deceased		1	carboplatin-paclitaxel	NO							Insufficient follow-up
739	Known primary tumour	Thyroid (Medullary carcinoma)		0			2	1		1	RET fus		0	0			CDKN2A del		24	1		11.1704	YES			2	vandetanib; selpercatinib (M20DRA)	YES	RET	selpercatinib	Experimental trial: Early access protocol				No actionable standard-of-care biomarkers
741	Known primary tumour	Oesophagus/stomach (Oesophagus)		2	carboplatin-paclitaxel; CAPOX		6	0		0			0	0			TP53 inact mut; SMAD4 inact mut; CDKN2A del; AMER1 del; HIST2H3D amp VUS; MCL1 amp VUS		51	3		12.2875	YES			2	paclitaxel-ramucirumab; TAS-102	NO							No actionable standard-of-care biomarkers
743	Known primary tumour	Breast (ER positive, Her2 negative)		4	4xddAC+12x paclitaxel; tamoxifen; letrozol; exemestane		5	3		1	PTEN inact mut		2	0	PIK3CA act mut; CCND1 amp				35	1.8		12.1561	YES			4	fulvestrant-palbociclib; docetaxel-trastuzumab-pertuzumab; TDM-1; TDXd	NO							Ongoing response on previous treatment/complete remission
744	Known primary tumour	Soft tissue (Sarcoma NOS)		1	doxorubicine-ifosfamide		11	2		2	MAP2K1 act mut; FGFR1 amp		0	0			GNAS amp; CDKN2A inact part del; MCL1 amp; MDM4 amp; TERT amp; TOP1 amp; PLCG1 amp; ZNF217 amp; HIST2H3D amp		48	2.6		15.1786	YES			1	trametinib (DRUP)	YES	MAP2K1	trametinib	Experimental trial	DRUP (M15DRU)		II	No actionable standard-of-care biomarkers
745	Known primary tumour	Mesothelioma		1	gemcitabine mono		3	0		0			0	0			BAP1 inact mut; MSH6 mono-allelic inact mut; SETD2 inact homoz disrup		47	1.6		14.8172	YES			1	gemcitabine mono	NO							No actionable standard-of-care biomarkers
746	Known primary tumour	Lung (NSCLC)		0			2	1		1	NF1 inact mut		0	0			TP53 inact mut		121	9.7		0.0328542	NO	BSC		0		NO							Insufficient follow-up
747	Known primary tumour	Soft tissue (Leiomyosarcoma)		0			1	0		0			0	0			TP53 inact mut		30	1.3		11.8604	YES			1	doxorubicine-DTIC	NO							No actionable standard-of-care biomarkers
748	Cancer of unknown primary	CUP (Breast; TNBC)		1	capecitabine		9	4		4	TML high; PIK3CA inact mut; MAP3K1 inact mut; PTEN inact mut		0	0			CDKN2A inact mut; TP63 inact mut; CTCF inact mut; CDKN2C del; PTPRD inact part del; TP53 inact part del		146	5.8		0.919918	NO	Second opinion		1	capecitabine (same)	NO							Insufficient follow-up
750	Cancer of unknown primary	CUP (Definitive CUP; Signet ring)		0			2	1		1	RAD51B inact part del		0	0			TP53 inact mut		67	4.7		5.71663	YES			1	FOLFOX	NO							No actionable standard-of-care biomarkers
751	Cancer of unknown primary	CUP (Definitive CUP; SCC)		0			6	3		3	TMB high; CD274 amp; CCND1 amp		0	0			TERTp mut; CDKN2A inact; TP53 inact mut		351	16.3		12.1561	YES			1	ipilimumab-nivolumab (DRUP)	YES	TMB	ipilimumab-nivolumablumab	Experimental trial	DRUP (M15DRU)		II	No actionable standard-of-care biomarkers
752	Known primary tumour	Melanoma (Mucosal)		2	ipilimumab-nivolumab; nivolumab mono		3	0		0			0	0			HRAS mut; BCR-IMPG1 fus; CDKN2A del		56	2.6		1.577	NO	Deceased		0		NO							No actionable biomarkers detected
753	Cancer of unknown primary	CUP (Definitive CUP; possibly Lung; NSCLC)		0			5	1		0			1	0	ALK fus		TP53 inact mut; SMAD4 inact mut; RB1 inact part del; SMARCB1 inact del		32	1.8		9.82341	YES			4	carboplatin-gemcitabine; alectinib; carboplatin-paclitaxel-atezolizumab-bevacizumab; paclitaxel mono	YES	ALK	alectinib	Reimbursed care				Actionable standard-of-care biomarker was treated
754	Known primary tumour	Uterus/endometrium		3	carboplatin-paclitaxel; Provera; tamoxifen		3	2		2	PTEN inact mut; FGFR2 act mut		0	0			CTNNB1 mut		75	3.3		11.2361	YES			1	anastrozole	NO							No actionable standard-of-care biomarkers
755	Known primary tumour	Breast (TNBC)		4	capecitabine-docetaxel (MINDACT); carboplatin-cyclofosfamide; RO7284755 (M20RCA); paclitaxel mono		4	3		3	PTEN inact mut; CDK6 amp; EGFR part amp		0	0			TP53 mut; FOXL2 amp		87	4.4		5.28953	YES			0		NO							No actionable standard-of-care biomarkers
756	Known primary tumour	Lung (NSCLC)		1	osimertinib		5	2		1	HRD no substrate		1	0	EGFR act mut		RB1 inact part del; PIK3CA mut; TP53 mut		120	6.2		9.03491	YES			2	osimertinib (same); carboplatin-pemetrexed-pembrolizumab	NO							Ongoing response on previous treatment/complete remission
757	Known primary tumour	Breast (TNBC)		4	tamoxifen; anastrozol; capecitabine; fulvestrant-palbociclib		5	3		3	FGFR2 amp; PIK3CA act mut; PTEN inact part del		0	0			AR resist mut; TP53 inact mut		83	3.5		10.3491	YES			2	fulvestrant-palbociclib (same); sacituzumab-govitecan	NO							No actionable standard-of-care biomarkers
758	Known primary tumour	Ovary		3	carboplatin-paclitaxel; carboplatin-gemcitabine; olaparib		4	2		2	MAP2K4 inact part del		0	0			TP53 inact mut; CIC inact mut; FUS-ALDOAp fus VUS		47	2		5.25667	YES			1	Caelyx	NO							No actionable standard-of-care biomarkers
759	Known primary tumour	Breast (ER positive, Her2 negative)		4	4x ddAC + 12x paclitaxel; letrozol; fulvestrant-palbociclib; paclitaxel mono		3	1		1	PTEN loss; CDK1 inact mut; KMT2C mono-allelic inact mut		0	0					37	1.3		6.34086	YES			0		NO							No actionable standard-of-care biomarkers
760	Known primary tumour	Soft tissue (Angiosarcoma)		0			3	1		1	TML high		0	0			CDKN2A del; UV signature		560	42.1		11.8275	YES			1	pembrolizumab (M15KEY)	YES	TML	pembrolizumab	Experimental trial	KEYNOTE 158	NCT02628067	II	No actionable standard-of-care biomarkers
761	Known primary tumour	Lung (NSCLC)		0			2	1		1	MAP2K1 act mut		0	0			STK11 inact mut		119	7.4		11.7947	YES			3	carboplatin-pemetrexed-pembrolizumab; pembrolizumab mono; paclitaxel-bevacizumab	NO							No actionable standard-of-care biomarkers
762	Known primary tumour	Colorectum (Colon)		7	FOLFOXIRI-B; FOLFOXIRI; capecitabine mono; FOLFIRI; CAPOX; panitumumab; BMS-986218 (M20MAA)		3	2		1	RET exon 12 fus		0	1	KRAS absent		APC inact mut; TP53 inact mut		98	5.5		5.65092	YES			1	sunitinib (M19SUN)	NO							Ongoing response on previous treatment/complete remission
763	Known primary tumour	Soft tissue (Leiomyosarcoma)		0			2	0		0			0	0			RB1 inact mut; TP53 inact mut		24	2.1		0.755647	NO	Other hospital referral		0		NO							No actionable biomarkers detected
764	Known primary tumour	Breast (ER positive, Her2 negative)		3	tamoxifen; letrozol; exemestane		1	0		0			0	0			KMT2C inact del		31	1.8		11.2361	YES			1	fulvestrant-palbociclib	NO							No actionable standard-of-care biomarkers
765	Known primary tumour	Lung (NSCLC)		4	afatinib; carboplatin-paclitaxel-atezolizumab-bevacizumab; atezolixumab-bevacizumab maintenance; afatinib retreatment		5	3		2	CDK4 amp; MDM2 amp		1	0	EGFR act mut		EGFR mut VUS; MCL amp		44	1.9		10.8747	YES			3	afatinib (same); carboplatin-pemetrexed; afatinib retreatment	NO							Standard-of-care biomarker was already treated before WGS
767	Known primary tumour	Skin (SCC)		0			2	2		1	TML high		1	0	EGFR amp		UV signature		1796	100.2		11.8275	YES			1	ipilimumab-nivolumab (MATISSE)	YES	TML	ipilimumab-nivolumablumab	Experimental trial	MATISSE (N20MAT)	NCT05742607	N/A	Ongoing response on previous treatment/complete remission
768	Cancer of unknown primary	CUP (Lung; NSCLC)		0			8	2		2	TML high; CD274 amp		0	0			KRAS amp; TP53 inact mut; NF2 inact mut; KMT2B inact mut; ARID1B inact mut; SMARCA4 mut VUS		309	25.5		-0.295688	NO	Second opinion		0		NO							Insufficient follow-up
769	Known primary tumour	Cervix [previously Lung (NSCLC)]		0			3	0		0			0	0			HPV type 16; TERTp act mut; NOTCH1 mut VUS		133	6.4		2.43121	NO	BSC		0		NO							No actionable biomarkers detected
770	Known primary tumour	Soft tissue (Leiomyosarcoma)		1	DTIC		4	2		2	PTEN inact part del; BRCA2 inact mut no HRD		0	0			TP53 inact mut; RB1 inact homoz disrup		66	6.2		14.0287	YES			4	doxorubicine-DTIC; pazopanib; gemcitabine-docetaxel; trabectedine	NO							No actionable standard-of-care biomarkers
772	Known primary tumour	Soft tissue (Pleomorphic liposarcoma)		2	doxorubicin; eribuline		3	1		1	NF1 inact mut		0	0			TP53 inact mut; CDKN2A del		16	1		14.653	YES			0		NO							No actionable standard-of-care biomarkers
773	Cancer of unknown primary	CUP (Definitive CUP; possibly Lung; NSCLC)		0			6	3		3	TML high; FGFR3 act mut; MET amp		0	0			FHIT inact part del; PARK2 inact part del; DEPDC5 inact part del		146	6.7		0.0328542	NO	Second opinion		0		NO							Insufficient follow-up
776	Known primary tumour	Soft tissue (Sarcoma NOS)		1	paclitaxel		3	1		1	TSC2 inact mut		0	0			TP53 inact mut; RB1 inact part del		72	4		6.34086	YES			1	cyclofosfamide	NO							No actionable standard-of-care biomarkers
777	Cancer of unknown primary	CUP (Biliary tract)		0			1	0		0			0	0			KRAS act mut		26	1.8		11.0062	YES			0	(chemotherapy)	NO							No actionable biomarkers detected
779	Known primary tumour	Bladder (UCC)		2	gemcitabine-cisplatin; BMS986016-nivolumab (M16LAG)		5	1		1	TML high		0	0			TP53 inact mut; CDKN2A del; TMEM30A inact mut; ATRX inact mut		439	28.5		6.14374	YES			2	tremelimumab (M18ICR); enfortumab vedotin (early access)	NO							No actionable standard-of-care biomarkers
781	Known primary tumour	Breast (TNBC)		3	6x TAC; carboplatin-paclitaxel; capecitabine		3	1		1	NOTCH2 act mut		0	0			TP53 inact mut; CDKN2A del		77	3.7		2.33265	NO	Deceased		1	doxorubicine	NO							Insufficient follow-up
783	Known primary tumour	Breast (ER positive, Her2 positive)		3	CLEOPATRA; T-deruxtecan (DESTINY-B12); T-DM1		5	2		0			2	0	PIK3CA act mut; ERBB2 amp		KRAS amp; MDM2 amp; RSF1 amp		40	1.7		13.6345	YES			3	T-DM1; EC-trastuzumab; trastuzumab maintenance	NO							Ongoing response on previous treatment/complete remission
784	Cancer of unknown primary	CUP (Definitive CUP; possibly Lower GI)		0			4	3		2	HRD+BRCA1 inact mut; KRAS act mut		1	0	KRAS present		TP53 inact mut		173	7.3		1.05133	NO	Second opinion		0		NO							Insufficient follow-up
785	Known primary tumour	Bladder (UCC)		2	gemcitabine-cisplatin; pembrolizumab		4	2		2	TML high; EGFR amp		0	0			MSH6 mut VUS; TP53 inact mut		250	11.6		10.9733	YES			1	GSK3745417-dostarlimab (M18GSK)	NO							No actionable standard-of-care biomarkers
786	Known primary tumour	Lung (NSCLC)		2	erlotinib; osimertinib		4	2		1	EGFR T790M resist mut		1	0	EGFR act mut		EGFR resist mut; CTNNB1 mut		39	1.9		5.68378	YES			1	BLU-945 (M21BLU); carboplatin-paclitaxel	YES	EGFR resistance	BLU-945	Experimental trial	SYMPHONY (M21BLU)		I/II	Standard-of-care biomarker was already treated before WGS
787	Known primary tumour	Pancreas (Neuro-endocrine; NET)		0			3	1		1	TSC2 inact mut		0	0			MEN1 inact mut; TP53 inact mut		35	1.3		0.821355	NO	Other hospital referral		1	(regular treatment)	NO							Insufficient follow-up
788	Known primary tumour	Bladder (UCC)		2	gemcitabine-cisplatin; pembrolizumab		3	2		2	TML high; EGFR amp		0	0			TP53 inact mut		235	11.4		11.3676	YES			2	dacomitinib (DRUP); enfortumab vedotin	YES	EGFR	dacomitinib	Experimental trial	DRUP (M15DRU)		II	No actionable standard-of-care biomarkers
790	Known primary tumour	Lung (NSCLC)		1	alectinib		5	1		0			1	0	ALK fus		SETD2 inact mut; BRD7 inact part del; PTPRD inact part del; ALK resist mut		88	4		13.1088	YES			1	alectinib (same)	NO							Standard-of-care biomarker was already treated before WGS
792	Known primary tumour	Colorectum (Colon)		1	CAPOX		5	3		1	TML high		1	1	MSI+MHL1 inact mut; KRAS absent		CTNNB1 act mut; TCF7L2 inact mut; B2M inact mut		1265	265.4		13.2731	YES			1	pembrolizumab	YES	MSI+MLH1	pembrolizumab	Reimbursed care				Actionable standard-of-care biomarker was treated
795	Known primary tumour	Head and neck (Nasopharynx; SCC)		0			2	0		0			0	0			TGFBR2 inact part del; TP53 inact homoz disrup		23	1.3		12.1232	YES			0		NO							No actionable standard-of-care biomarkers
796	Known primary tumour	Lung (NSCLC)		1	dabrafenib-trametinib		3	2		1	TML high		1	0	BRAF V600E act mut		TP53 inact mut		164	8.9		10.5791	YES			1	carboplatin-pemetrexed-pembrolizumab	NO							Standard-of-care biomarker was already treated before WGS
797	Known primary tumour	Head and neck (Oropharynx)		0			2	3		3	TML high; KRAS act mut; CCND1 amp		0	0			TP53 inact mut; FGF3 amp		269	18.6		12.4517	YES			0		NO							No actionable standard-of-care biomarkers
799	Known primary tumour	Colorectum (Colon)		0			3	2		1	ERBB2 amp		0	1	KRAS absent		APC inact mut; TP53 inact mut		111	6.7		7.26078	YES			3	CAPOX-B; S1-OX-B; irinotecan	NO							Standard-of-care biomarker was already treated before WGS
800	Cancer of unknown primary	CUP (Lung; NSCLC)		0			5	1		1	TML high		0	0			CTNNB1 act mit; KEAP 1 inact mut; STK11 part del; CDKN2A del		165	8.2		0.164271	NO	Second opinion		0		NO							Insufficient follow-up
801	Known primary tumour	Ovary		4	carboplatin-gemcitabine; olaparib; niraparib; Caelyx-bevacizumab		4	2		2	HRD no substrate; NF1 inact part del		0	0			RB1 inact mut; TP53 inact mut		110	5.7		12.1889	YES			3	Caelyx-bevacizumab; paclitaxel mono; CAR-T (M20CLD)	NO							No actionable standard-of-care biomarkers
803	Known primary tumour	Lung (NSCLC)		1	osimertinib		7	3		2	TML high; MYC amp		1	0	EGFR act mut		TP53 inact; CDKN2A full loss; NTRK1 amp; PTPRD inact part del		188	8.1		0.755647	NO	Second opinion		0		NO							Insufficient follow-up
804	Known primary tumour	Lung (NSCLC)		2	erlotinib; osimertinib		10	4		3	MET amp; MYC amp; MDM2 amp		1	0	EGFR act mut		PABPC1 amp; RAD21 amp; ZBTB10 amp; TG amp; H3C13 amp; ZNF217 amp		59	3.3		11.9589	YES			3	capmatinib-osimertinib (compassionate use); carboplatin-paclitaxel-atezolizumab-bevacizumab; atezo-bevacizumab maintenance	YES	EGFR+MET amp	osimertinib-capmatinib	Experimental trial: Compassionate use programme				Standard-of-care biomarker was already treated before WGS
806	Known primary tumour	Soft tissue (Spindle cell sarcoma)		0			1	0		0			0	0			EIF1AX amp		8	0.5		12.3532	YES			0		NO							No actionable standard-of-care biomarkers
807	Cancer of unknown primary	CUP (Penis)		1	carboplatin-paclitaxel		8	2		2	TML high; AKT1 act mut		0	0			HPV type 67; VHL inact mut; TERTp mut; ZNF750 inact mut; DDX3X inact mut; RUNX1 inact part del		145	6.8		13.076	YES			1	MK-1484 (M22MKP)	NO							No actionable standard-of-care biomarkers
809	Known primary tumour	Pancreas		2	FOLFIRINOX; nab-paclitaxel-gemcitabine		3	1		1	KRAS act mut		0	0			TP53 inact mut; CDKN2A loss		80	4		4.46817	YES			0		NO							No actionable standard-of-care biomarkers
810	Known primary tumour	Mesothelioma		1	carboplatin-pemetrexed		2	0		0			0	0			BAP1 inact mut; CDKN2A del		38	1.8		0.0985626	NO	Second opinion		0		NO							No actionable biomarkers detected
811	Known primary tumour	Soft tissue (Myxoid liposarcoma)		0			2	1		1	PIK3CA act mut		0	0			TP53 inact mut		42	2.3		5.42094	YES			2	doxorubicine-ifosfamide; doxorubicine-cyclofosfamide	NO							No actionable standard-of-care biomarkers
812	Known primary tumour	Soft tissue (Liposarcoma)		0			7	2		2	CDK4 amp; MDM2 part amp		0	0			TOP1 amp; PLCG1 amp; PREX2 part amp; ZNF217 amp; ATRX inact part del		47	2.3		11.4004	YES			3	doxorubicine; ifosfamide; abemaciclib (DRUP)	YES	CDK4	abemaciclib	Experimental trial	DRUP (M15DRU)		II	No actionable standard-of-care biomarkers
813	Known primary tumour	Salivary gland		0			4	3		3	PIK3CA act mut; EGFR act mut; CCND1 amp		0	0			TP53 inact mut		132	7.1		4.63244	YES			0		NO							No actionable standard-of-care biomarkers
814	Known primary tumour	Colorectum (Appendix; goblet cell)		0			1	1		0			0	1	KRAS absent		TP53 inact mut		65	5.4		2.52977	NO	Deceased		1	FOLFOX	NO							Insufficient follow-up
815	Cancer of unknown primary	CUP (Colorectum)		0			4	1		0			0	1	KRAS absent		APC inact mut; TP53 inact mut ACVR1B del; ARID2 del		108	5.9		0.262834	NO	Other hospital referral		1	CAPOX	NO							Insufficient follow-up
818	Known primary tumour	Soft tissue (Low grade sarcoma)		0			2	1		1	BRAF class III act mut		0	0			CDKN2A del		72	3.2		12.7146	YES			0		NO							No actionable standard-of-care biomarkers
819	Known primary tumour	GIST		3	imatinib; sunitinib; regorafenib		4	1		0			1	0	KIT act mut		KIT resist mut; DMD inact part del; CDKN2A del		48	3		-0.197125	NO	Deceased		0		NO							Insufficient follow-up
820	Known primary tumour	Soft tissue (Spindle cell/pleomorphic sarcoma)		1	doxorubicine-ifosfamide		5	2		2	FGFR2 act mut; NF1 inact part del		0	0			MSH6 mono-allelic mut; TP53 inact part del; RB1 inact part del		18	1.6		3.8768	YES			1	pazopanib	NO							No actionable standard-of-care biomarkers
821	Known primary tumour	Oesophagus/stomach (GEJ; adenocarcinoma)		3	FLOT-trastuzumab (M15FNN); trastuzumab mono; carboplatin-paclitaxel		5	1		1	TML high		0	0			CDKN2A inact mut; TP53 inact mut; KRAS amp; SMAD4 del		157	21.4		3.02259	YES			0		NO							No actionable standard-of-care biomarkers
823	Cancer of unknown primary	CUP (Cervix)		1	CCRT		3	1		1	AKT1 act mut		0	0			HPV type 45; KRT5 inact mut		125	5.9		0.229979	NO	Second opinion		0		NO							Insufficient follow-up
824	Known primary tumour	Prostate		1	abirateron-prednison		4	2		2	PTEN loss; PIK3CA act mut		0	0			CDKN2A loss; KDM6A inact part del		45	1.8		11.7618	YES			1	enzalutamide	NO							No actionable standard-of-care biomarkers
826	Known primary tumour	Breast (Angiosarcoma)		4	FEC-docetaxel; tamoxifen; anastrozol; paclitaxel		2	2		2	NF1 inact mut; MYC amp		0	0					49	2.8		5.55236	YES			0		NO							No actionable standard-of-care biomarkers
827	Known primary tumour	Soft tissue (Sarcoma NOS)		0			3	1		1	PTEN inact del		0	0			CDKN2A del; RB1 mut		29	1.9		9.29774	YES			2	doxorubicine-ifosfamide; pazopanib	NO							No actionable standard-of-care biomarkers
828	Cancer of unknown primary	CUP (Lung; NSCLC)		0			7	2		2	TML high; FANCF inact mut		0	0			TP53 inact mut; CDKN2A inact mut; SMARCA4 inact mut; NRAS amp; smoking signature		608	41.4		0.492813	NO	Second opinion		0		NO							Insufficient follow-up
829	Known primary tumour	Breast (ER positive, Her2 negative)		3	4x ddAC+3x docetaxel; carboplatin mono; chlorambucil+letrozole		4	2		1	PTEN loss		1	0	HRD+BRCA2 inact mut		TP53 inact part del		66	3.5		4.40246	YES			2	fulvestrant-ribociclib; olaparib	YES	HRD+BRCA2	olaparib	Reimbursed care				Actionable standard-of-care biomarker was treated
832	Known primary tumour	Bone (Osteosarcoma)		0			3	0		0			0	0			ATRX mut; TP53 inact part del; RB1 inact homoz disrup		30	2		8.01643	YES			0		NO							No actionable standard-of-care biomarkers
833	Known primary tumour	Breast (ER positive, Her2 negative)		7	4x ddAC+paclitaxel; letrozole; tamoxifen; anastrozol; carboplatin-paclitaxel; capecitabine-vinorelbine; tamoxifen retreatment		7	1		1	TML high		0	0			ESR1 mut; TP53 inact mut; PHF6 mut; RSF1 amp; ZNF217 amp; GNAS amp		195	9.8		8.80493	YES			1	fulvestrant-ribociclib	NO							No actionable standard-of-care biomarkers
834	Known primary tumour	Urothelial tract		3	gemcitabine-cisplatin; tremelimumab-durvalumab (M16MET); pembrolizumab		4	3		3	TML high; TSC1 inact mut; MDM2 amp		0	0			AMER1 inact del		471	19.7		8.80493	YES			1	pembrolizumab retreatment	NO							No actionable standard-of-care biomarkers
835	Cancer of unknown primary	CUP (Lung; SCLC)		0			5	1		1	TML high		0	0			RB1 inact mut; TP53 inact mut; KEAP1 inact mut; B2M del		327	25.5		2.13552	NO	Deceased		1	carboplatin-paclitaxel-atezolizumab-bevacizumab	NO							Insufficient follow-up
836	Known primary tumour	Soft tissue (Leiomyosarcoma)		0			4	0		0			0	0			TP53 inact mut; ATRX mut; BCR-ZBTB8A fus; RB1 inact part del		29	1.6		2.59548	NO	Second opinion		0		NO							No actionable biomarkers detected
838	Known primary tumour	Soft tissue (Pleomorphic sarcoma NOS)		2	doxorubicine-ifosfamide; pazopanib		3	1		1	EGFR fus		0	0			TP53 inact del; TB1 inact part del		25	1.4		10.6448	YES			1	pazopanib (same)	NO							No actionable standard-of-care biomarkers
840	Known primary tumour	Lung (NSCLC)		1	afatinib-cetuximab (M18ACX)		4	2		1	PIK3CA act mut		1	0	EGFR exon 20 mut		RB1 inact mut; TP53 inact mut		122	5.2		8.67351	YES			2	carboplatin-paclitaxel-atezolizumab-bevacizumab (M20TRM); CLN-081 (M19CLN)	NO							Standard-of-care biomarker was already treated before WGS
841	Cancer of unknown primary	CUP (Lung; NSCLC)		0			1	1		1	KRAS act mut		0	0					74	5.1		2.79261	NO	Deceased		0		NO							Insufficient follow-up
842	Cancer of unknown primary	CUP (Skin; BCC)		0			5	2		1	TML high		1	0	PTCH1 inact mut		TP53 inact disrup; AXIN1 inact mut VUS; UV signature		1091	67.4		8.73922	YES			0		NO							Patient wishes no treatment
843	Cancer of unknown primary	CUP (Colorectum; neuro-endocrine; NEC)		1	cisplatin-etoposide		4	0		0			0	0			FBXW7 inact mut; APC inact mut; RB1 inact mut; TP53 inact mut		53	3		5.84805	YES			1	cisplatin-etoposide (same)	NO							No actionable biomarkers detected
844	Known primary tumour	Lung (NSCLC)		1	osimertinib		4	1		0			1	0	EGFR act mut		TP53 inact mut; CDKN2A inact del; TERT amp		75	3.9		6.11088	YES			2	carboplatin-pemetrexed-osimertinib (M19ORC ORCHARD); panitumumab-deruxtecan (M19UNS)	YES	EGFR	osimertinib	Experimental trial	ORCHARD (M19ORC)	NCT03944772	II	Study treatment for standard-of-care biomarker
845	Known primary tumour	Prostate		3	LHRH; abiraterone-prednison; docetaxel		4	2		2	AR amp; PTEN inact part del		0	0			TP53 inact mut; TMPRSS2-ERG fus		46	2.2		8.24641	YES			1	carboplatin-cabazitaxel	NO							No actionable standard-of-care biomarkers
848	Cancer of unknown primary	CUP (Lung; NSCLC)		0			5	3		3	TML high; MYC amp; KRAS act mut		0	0			TP53 inact mut; KEAP1 inact mut		154	12.6		0.657084	NO	BSC		0		NO							Insufficient follow-up
849	Cancer of unknown primary	CUP (Skin; SCC)		0			4	2		2	TML high; PTEN del		0	0			TP53 inact mut; IRF2 inact part del		687	42.1		8.31211	YES			0		NO							No actionable standard-of-care biomarkers
850	Cancer of unknown primary	CUP (Lung; NSCLC)		0			4	1		1	TML high		0	0			TP53 inact mut; SMARCA4 inact mut; STAG2 inact part del		303	18.2		0.755647	NO	BSC		0		NO							Insufficient follow-up
851	Cancer of unknown primary	CUP (Lung; NSCLC)		0			6	1		1	TML high		0	0			KRAS act mut; RB1 inact mut; STK11 inact mut; SMARCA4 inact mut; TP53 inact part del		353	28.4		0.197125	NO	Second opinion		0		NO							Insufficient follow-up
852	Cancer of unknown primary	CUP (Definitive CUP; possibly Pancreas)		0			3	1		1	MDM2 amp		0	0			KRAS act mut; CDKN2A inact part del		32	1.9		0.492813	NO	Second opinion		0		NO							Insufficient follow-up
857	Cancer of unknown primary	CUP (Colorectum)		0			6	5		3	TML high; RAF1 act mut; RNF43 inact mut		1	1	MSI+MSH2 inact mut+MSH6 inact mut; KRAS absent		ARID1A inact mut; ACVR2A inact mut		1424	268.3		8.01643	YES			1	pembrolizumab	YES	MSI+MSH2	pembrolizumab	Reimbursed care				Actionable standard-of-care biomarker was treated
858	Cancer of unknown primary	CUP (Pancreas; neuro-endocrine; NEC)		1	cisplatin-etoposide		7	1		1	KRAS act mut		0	0			POLE mut VUS; STK11 inact mut; CDKN2A inact del; SMARCA4 inact part del; CDKN2A del; PTPRD inact part del		39	1.9		0.788501	NO	Second opinion		1	cisplatin-etoposide (same)	NO							Insufficient follow-up
861	Known primary tumour	Myeloproliferative neoplasm [previously Colorectum (Sigmoid)]		0			2	1		1	NRAS act mut		0	0			NRAS mut VUS		65	5.2		8.1807	YES			0		NO							No actionable standard-of-care biomarkers
866	Known primary tumour	Lung (NSCLC)		2	pembrolizumab mono; carboplatin-pemetrexed-pembrolizumab		6	2		1	HRD+BRCA2 inact mut		1	0	EGFR act mut		APC inact mut; SMAD4 inact mut; CDKN2A inact del		118	6.2		1.1499	NO	Second opinion		1	(osimertinib)	NO							Insufficient follow-up
867	Known primary tumour	Prostate		4	bicalutamide; docetaxel; cabazitaxel; abiraterone-prednison		4	3		2	TML high; AR amp		1	0	HRD+BRCA1 inact mut		TMPRSS2-ERG fus		150	8.1		9.62628	YES			1	olaparib	YES	HRD+BRCA1	olaparib	Reimbursed care				Actionable standard-of-care biomarker was treated
868	Known primary tumour	Vulva		1	carboplatin-paclitaxel		6	1		1	CCND1 amp		0	0			BRCA1 mono-allelic inact mut no HRD; HPV type 16; H3-3A mut; FGF3 amp; ITGAV inact part del		52	3.6		1.31417	NO	Deceased		0		NO							Insufficient follow-up
869	Known primary tumour	Soft tissue (Fibrosarcoma)		2	doxorubicine-ifosfamide; pazopanib		2	0		0			0	0			YAP1-KMT2A fus; CDKN2A inact homoz disrup		20	0.8		7.72074	YES			0		NO							No actionable standard-of-care biomarkers
870	Known primary tumour	Biliary tract		0			4	1		1	IDH1 act mut		0	0			RARG mut; CDKN2A del; SAV1 inact part del		27	1.3		0.262834	NO	Second opinion		0		NO							Insufficient follow-up
871	Known primary tumour	Lung (NSCLC)		2	4x cisplatin-pemetrexed; nivolumab		10	1		1	PTEN inact mut		0	0			TML high; TP53 inact mut; LRP1B inact part del; FOXP1 del; ATG7 inact part del; CDKN2A del; SMAD3 inact part del; SMAD2 inact part del		165	8.8		7.45791	YES			0		NO							No actionable standard-of-care biomarkers
872	Cancer of unknown primary	CUP (Skin; SCC)		0			2	1		1	TML high		0	0			ARID2 inact mut; HPV type 16		42	1.6		7.55647	YES			1	ipilimumab-nivolumab (M20MAT MATISSE)	YES	TML	ipilimumab-nivolumablumab	Experimental trial	MATISSE (N20MAT)	NCT05742607	N/A	No actionable standard-of-care biomarkers
873	Known primary tumour	Breast (TNBC)		5	ddAC; tamoxifen; carboplatin-gemcitabine; adriamycine-nivolumab (TONIC); capecitabine-carboplatin		7	2		2	AR amp; PIK3R1 inact part del		0	0			CTNNA1 mut; TP53 mut; NCOR1 mut; RB1 inact part del; TRIM51 amp		136	5.3		6.99795	YES			3	vinorelbine; doxorubicine; sacituzumab-govetican	NO							No actionable standard-of-care biomarkers
874	Cancer of unknown primary	CUP (Ovary; SCC)		1	carboplatin-paclitaxel		3	1		1	HRD no substrate		0	0			TP53 inact mut; CDKN2A inact del		108	6.5		3.61396	YES			0		NO							Low performance status
875	Known primary tumour	Breast (ER positive, Her2 negative)		4	palbociclib (M7SJA-A); fulvestrant; capecitabine; paclitaxel		11	1		1	CCND1 amp		0	0			GATA3 inact mut; CD79B amp; PPM1D amp; FGF3 amp; MDM4 amp; USP32 amp; MCL1 amp; ZBTB10 amp; GNAS amp; ZNF217 amp		48	3.1		5.94661	YES			1	doxorubicine	NO							No actionable standard-of-care biomarkers
880	Known primary tumour	Oesophagus/stomach (Oesophagus; radiation-induced sarcomatoid carcinoma)		0			5	1		1	PTEN del		0	0			TP53 inact mut; CDKN2A del; NOTCH1 inact mut; KTM2D inact mut		47	2.7		3.154	YES			1	FOLFOX-pembrolizumab (Keynote 590)	NO							No actionable standard-of-care biomarkers
882	Known primary tumour	Lung (NSCLC)		5	gefitinib; osimertinib; carboplatin-pemetrexed; pemetrexed mono; osimertinib retreatment; carboplatin-pemetexed retreatment		2	2		1	TML high		1	0	EGFR act mut		TP53 inact mut		255	13.5		3.12115	YES			1	paclitaxel-atezo-bevacizumab (M19UNS)	NO							Ongoing response on previous treatment/complete remission
883	Known primary tumour	Ovary (High grade serous carcinoma)		0			4	0		0			0	0			TP53 inact mut; IKBKB amp; RYR1 amp; ANK1 part amp		51	2.1		1.70842	NO	Second opinion		1	carboplatin-paclitaxel	NO							No actionable biomarkers detected
884	Known primary tumour	GIST		3	imatinib; sunitinib; regorafenib		2	1		1	KIT act mut		0	0			BARD1 inact mut		13	0.7		5.8809	YES			1	nilotinib (DRUP)	YES	KIT	nilotinib	Experimental trial	DRUP (M15DRU)		II	No actionable standard-of-care biomarkers
885	Known primary tumour	Skin (SCC)		0			9	1		1	TML high		0	0			UV signature; TERT mut; NOTCH1 inact; TP53 inact mut; CD44 amp; CDKN2A del; CALR amp		315	20.6		6.86653	YES			1	ipilimumab-nivolumab (M20MAT MATISSE)	YES	TML	ipilimumab-nivolumablumab	Experimental trial	MATISSE (N20MAT)	NCT05742607	N/A	No actionable standard-of-care biomarkers
887	Cancer of unknown primary	CUP (Oesophagus/stomach; Oesophagus)		1	FOLFOX-trastuzumab		7	2		1	TML high		1	0	ERBB2 amp		TGFBR1 inact mut; TP53 inact mut; CDKN2A inact mut; KMT2B inact mut; KRAS amp		263	34.3		0.131417	NO	Second opinion		1	FOLFOX-trastuzumab (same)	NO							Insufficient follow-up
888	Cancer of unknown primary	CUP (Definitive CUP; possibly Pancreas; neuro-endocrine; LCNEC)		0			3	0		0			0	0			CTNNB1 act mut; ARID2 inact mut; BMPR1A inact part del		62	3.8		6.6037	YES			1	capecitabine-temozolomide	NO							No actionable biomarkers detected
889	Known primary tumour	Lung (Carcinoid; atypical carcinoid)		1	cisplatin/carboplatin-etoposide		6	4		3	MSI+MLH1 inact mut; ATM inact mut; CCND1 amp		1	0	TML high		FGF3 coamp		356	33.1		4.43532	YES			2	(pembrolizumab; carboplatin-etoposide)	YES	TML	pembrolizumab	Reimbursed care				Actionable standard-of-care biomarker was treated
890	Known primary tumour	Lung (NSCLC)		1	osimertinib		4	1		0			1	0	EGFR act mut		TP53 inact mut; CHEK2 mut VUS; CDKN2A del		111	7.4		6.63655	YES			1	osimertinib (same)	NO							Standard-of-care biomarker was already treated before WGS
891	Known primary tumour	Lung (Carcinoid; atypical carcinoid)		2	everolimus; capecitabine-temozolomide		2	1		0			1	0	TML high		TMZ signature		6507	243.6		6.6037	YES			1	pembrolizumab	YES	TML	pembrolizumab	Reimbursed care				Actionable standard-of-care biomarker was treated
892	Cancer of unknown primary	CUP (Definitive CUP; possibly Lower GI)		0			4	4		3	KRAS act mut; PTEN inact part del; RNF43 inact par del		1	0	KRAS present		TP53 inact mut		102	7.9		9.82341	YES			0	CAPOX-B	YES	KRAS present	no EGFR inhibitor	Reimbursed care				Actionable standard-of-care biomarker was treated
894	Cancer of unknown primary	CUP (Lung; NSCLC)		0			6	2		2	TML high; BRAF class III act mut; NF1 inact homoz disrup		0	0			TP53 inact mut; STK11 del; TGFBR2 inact homoz disrup		140	9.6		3.28542	YES			0		NO							No actionable standard-of-care biomarkers
895	Known primary tumour	Lung (Carcinoid; atypical carcinoid)		2	everolimus; capecitabine-temozolomide		2	0		0			0	0			TML low; HRAS act mut		33	1.5		2.89117	NO	Deceased		0		NO							No actionable biomarkers detected
896	Known primary tumour	Urothelial tract		3	gemcitabine-cisplatin (M17NIU); M18ICR; pembrolizumab		8	3		3	TML high; ARID1A inact mut; CCND1 amp		0	0			FGF3 amp; TP53 inact mut; TERTp act mut; CDKN2A inact mut; KMD6A inact part del		225	10.4		0.788501	NO	Deceased		0		NO							Insufficient follow-up
897	Cancer of unknown primary	CUP (Ovary)		2	carboplatin-paclitaxel; carboplatin-paclitaxel retreatment		13	3		3	HRD no substrate; NF1 inact mut; PTEN del		0	0			VHL mut VUS; CREBBP splice mut; TP53 inact mut; CIC del; ERF del; FHIT inact part del; USp22 inact part del; BMPR1A del; RB1 inact homoz disrup		100	4.1		0.131417	NO	Second opinion		0		NO							Insufficient follow-up
898	Known primary tumour	Urothelial tract		0			3	1		1	PDGFRB act mut		0	0			CDKN2A del; JMJD4 mut		52	3.3		0.887064	NO	Second opinion		0		NO							Insufficient follow-up
899	Known primary tumour	Benign tumour (Leiomyoma)		0			0	0		0			0	0					5	0.2		6.53799	YES			0		NO							No actionable standard-of-care biomarkers
900	Known primary tumour	Colorectum (Colon)		1	CAPOX(-B)		5	3		2	PIK3CA act mut; KRAS act mut		1	0	KRAS present		APC inact mut; TP53 inact mut; AMER1 inact mut		69	3.6		9.3306	YES			2	FOLFIRI; relatlimab-nivolumablumab (M22RLT RELATIVITY)	YES	KRAS present	no EGFR inhibitor	Reimbursed care				Actionable standard-of-care biomarker was treated
901	Known primary tumour	Urachus		1	CAPOX		5	2		2	KIT/PDGFRA coamp; FLT3 amp		0	0			TP53 inact mut; KRAS amp		81	5.5		4.73101	YES			1	CAPOX (same)	NO							No actionable standard-of-care biomarkers
902	Cancer of unknown primary	CUP (Biliary tract)		0			3	1		1	KRAS act mut		0	0			TP53 inact mut; CDKN2A del		22	1		3.90965	YES			2	gemcitabine-cisplatin; CAPOX	NO							No actionable standard-of-care biomarkers
903	Cancer of unknown primary	CUP (Lung; NSCLC)		0			9	2		2	TML high; KRAS act mut		0	0			NTHL1 inact mut; IDH1 act mut; SETD2 inact splice mut; TP53 inact; KEAP1 inact splice mut; SMARCA4 inact part del; LRP1B inact part del		1269	85.6		0.459959	NO	Second opinion		0	(carboplatin-pemetrexed-pembrolizumab)	NO							Insufficient follow-up
904	Known primary tumour	Colorectum (Rectum)		1	CAPOX-B		10	4		3	ERBB2 act mut; ERBB2 amp; KRAS act mut		1	0	KRAS present		ELF3 inact mut; APC inact mut; TCF7L2 inact mut; TP53 inact mut; SMAD4 inact mut; KDM6A splice mut; TOP2A amp;		68	4.8		6.11088	YES			2	FOLFIRI; RMC4630-LY3214996 (M20SHP)	YES	KRAS present	no EGFR inhibitor	Reimbursed care				Actionable standard-of-care biomarker was treated
905	Known primary tumour	Lung (NSCLC)		3	CCRT; carboplatin-pemetrexed-pembrolizumab; pemetrexed-pembrolizumab maintenance		5	4		4	TML high; NF1 inact mut; EGFR amp; CDK6 amp		0	0			TP53 inact mut		305	21.9		8.83778	YES			1	carboplatin-pemetrexed	NO							No actionable standard-of-care biomarkers
907	Known primary tumour	Melanoma [previously Soft tissue (spindle cell)]		0			6	2		2	TML high; NRAS act mut		0	0			TERTp mut; RAC1 mut; ARID2 inact mut; TP53 inact mut		882	63		9.3306	YES			1	nivolumab (M21NDN NADINA)	NO							No actionable standard-of-care biomarkers
908	Cancer of unknown primary	CUP (Skin adnex; sebaceous gland cell)		0			12	4		4	TML high; MAP3K1 inact mut; PTEN inact mut; EP300 inact mut		0	0			UV signature; FAT1 inact mut; TERTp mut; HLA-A inact mut; RB1 inact mut; B2M inact mut; TP53 inact mut; CTK mut		2075	126		9.03491	YES			0		NO							No actionable standard-of-care biomarkers
909	Cancer of unknown primary	CUP (Lung; SCLC)		1	carboplatin-etoposide		2	1		1	MYC amp		0	0			RB1 inact mut		99	8.7		0.0657084	NO	Second opinion		0		NO							Insufficient follow-up
910	Known primary tumour	Soft tissue (Nerve sheath sarcoma)		0			2	1		1	NF1 inact mut		0	0			CDKN2A del		19	1.6		9.3306	YES			0		NO							No actionable standard-of-care biomarkers
911	Known primary tumour	Lung (Carcinoid; atypical carcinoid)		1	everolimus		2	1		1	CCND1 amp		0	0			MEN1 inact mut; TMB low		25	1.6		9.23203	YES			3	palbociclib (DRUP); capecitabine-temozolomide; axitinib (compassionate use)	YES	CCND1	palbociclib	Experimental trial	DRUP (M15DRU)		II	No actionable standard-of-care biomarkers
912	Known primary tumour	Soft tissue (Leiomyosarcoma)		0			1	1		1	PTCH1 inact part del		0	0					11	0.6		9.46201	YES			1	doxorubicine-DTIC	NO							No actionable standard-of-care biomarkers
913	Cancer of unknown primary	CUP (Breast; TNBC)		0			5	3		3	TML high; NF1 inact mut; PIK3CA act mut		0	0			CDH1 inact mut; TP53 inact mut		173	7		2.03696	NO	Second opinion		0		NO							Insufficient follow-up
914	Known primary tumour	Breast (ER positive, Her2 negative)		3	letrozole; letrozole-palbociclib; fulvestrant-alpelisib		2	1		1	NTRK3 fus		0	0			PIK3CA subcl mut		61	2.3		9.10062	YES			2	capecitabine-pembrolizumab/placebo (M21KNB); entrectinib (drug access protocol)	YES	NTRK3	entrectinib	Experimental trial: Early access protocol				No actionable standard-of-care biomarkers
915	Known primary tumour	Uterus/endometrium		2	carboplatin mono; carboplatin-gemcitabine		2	0		0			0	0			TP53 inact mut; MAROD2 inact part del		49	1.9		8.14784	YES			1	carboplatin-gemcitabine (same)	NO							No actionable standard-of-care biomarkers
917	Known primary tumour	Prostate		3	ADT; docetaxel; cabazitaxel		5	1		1	PTEN del		0	0			CTNNB1 act mut; HRAS act mut; TP53 inact mut; PALB2 mono-allelic inact mut		63	3.1		8.67351	YES			2	cabazitaxel-carboplatin; enzalutamide	NO							No actionable standard-of-care biomarkers
918	Known primary tumour	Penis		1	carboplatin-paclitaxel		3	1		1	MDM2 amp		0	0			HPV type 16; NOTCH1 inact mut		31	1.4		9.23203	YES			1	MCLA145 (M19MCL)	NO							No actionable standard-of-care biomarkers
919	Known primary tumour	Head and neck (SCC)		0			6	1		1	TML high		0	0			NOTCH2 inact mut; TERTp mut; CDKN2A inact mut; TP53 inact mut; UV signature;		944	53.9		9.06776	YES			1	nivolumab (N20MAT MATISSE)	YES	TML	nivolumab	Experimental trial	MATISSE (N20MAT)	NCT05742607	N/A	No actionable standard-of-care biomarkers
922	Known primary tumour	Lung (NSCLC)		1	afatinib		1	1		0			1	0	EGFR act mut		EGFR T790M resist mut; TP53 inact mut		80	4.8		8.6078	YES			1	osimertinib	YES	EGFR	osimertinib	Reimbursed care				Actionable standard-of-care biomarker was treated
923	Known primary tumour	Soft tissue (sarcoma NOS)		0			3	0		0			0	0			TP53 inact mut; RB1 inact part del; ATRX inact part del		42	2.7		5.55236	YES			2	doxorubicine; pazopanib	NO							No actionable standard-of-care biomarkers
925	Known primary tumour	Soft tissue (Spindle cell sarcoma)		0			2	0		0			0	0			TP53 inact mut; CD44 amp		2	0.2		7.85216	YES			1	cyclofosfamide	NO							No actionable standard-of-care biomarkers
926	Cancer of unknown primary	CUP (Definitive CUP; possibly Anogenital; SCC)		0			3	0		0			0	0			CTNNB1 act mut; TP53 inact mut; CDKN2A del		63	2.3		8.80493	YES			1	carboplatin-paclitaxel	NO							No actionable biomarkers detected
927	Known primary tumour	Urothelial tract (UCC)		2	gemcitabine-cisplatin/carboplatin; avelumab		2	1		1	MYC amp		0	0			RB1 inact mut		82	3.9		5.35524	YES			2	paclitaxel-tremelimumab (M18ICR ICRA); enfortumab vedotin	NO							No actionable standard-of-care biomarkers
928	Known primary tumour	Testis (Seminoma)		0			3	2		2	HRD no substrate; CCND2 amp		0	0			KRAS amp		104	4.2		8.6078	YES			1	EP	NO							No actionable standard-of-care biomarkers
929	Cancer of unknown primary	CUP (Biliary tract; adenocarcinoma)		1	gemcitabine-cisplatin		4	1		1	NRAS act mut		0	0			SMARCB1 inact splice mut; CDKN2A loss; PTPRD inact part del		27	1.8		0.197125	NO	Second opinion		0		NO							Insufficient follow-up
931	Known primary tumour	Penis		0			6	1		1	PIK3CA act mut		0	0			HRAS act mut; TP53 inact mut; FAT1 inact mut; TERTp act mut; NOTCH1 inact mut		48	2.3		0.525667	NO	Deceased		1	capecitabine	NO							Insufficient follow-up
932	Known primary tumour	Lung (NSCLC)		1	osimertinib		5	2		1	PTEN del		1	0	EGFR act mut		TP53 inact mut; RB1 inact mut; CCNE1 amp		58	3.1		0.295688	NO	Other hospital referral		1	osimertinib (same); (carboplatin-pemetrexed or carboplatin-paclitaxel-atezolizumab-bevacizumab)	NO							Insufficient follow-up
934	Known primary tumour	Ovary (Low grade serous carcinoma)		1	carboplatin-paclitaxel		1	1		1	NRAS act mut		0	0					22	0.7		8.27926	YES			1	carboplatin-paclitaxel (same)	NO							No actionable standard-of-care biomarkers
936	Known primary tumour	Colorectum (Sigmoid)		0			3	1		0			0	1	KRAS absent		APC inact splice mut; TP53 inact mut; SMAD3 inact del		55	3.8		8.6078	YES			1	FOLFOX-panitumumab	YES	KRAS absent	panitumumab	Reimbursed care				Actionable standard-of-care biomarker was treated
937	Known primary tumour	Colorectum (Appendix; mucinous adenocarcinoma)		0			5	4		3	TML high; GNAS act mut; KRAS act mut		1	0	KRAS present		TP53 inact mut; SMAD2 inact mut		152	10.9		7.95072	YES			1	FOLFIRI	YES	KRAS present	no EGFR inhibitor	Reimbursed care				Actionable standard-of-care biomarker was treated
938	Known primary tumour	Colorectum (Colon)		2	CAPOX-B; HIPEC		2	0		0			0	0			APC inact mut; TP53 inact mut		111	8.9		0.657084	NO	Other hospital referral		0		NO							No actionable biomarkers detected
939	Known primary tumour	Soft tissue (Leiomyosarcoma)		1	doxorubicin-DTIC; trabectedine		3	0		0			0	0			RB1 inact mut; TP53 inact mut; ATRX inact part del		121	7.7		8.24641	YES			1	trabectedine	NO							No actionable standard-of-care biomarkers
940	Known primary tumour	Ovary (High grade adenocarcinoma)		0			6	1		0			1	0	HRD+BRCA1 inact mut		KRAS act mut; CDKN2A inact mut; TP53 inact mut; MGA inact part del; SMAD4 del		76	3.9		8.1807	YES			2	carboplatin-paclitaxel; olaparib	YES	HRD+BRCA1	olaparib	Reimbursed care				Actionable standard-of-care biomarker was treated
941	Known primary tumour	Soft tissue (Leiomyosarcoma)		3	(doxorubicin-)DTIC; gemcitabine; trabectedine		3	1		1	PTEN loss		0	0			RB1 inact homoz disrup; TP53 inact mut		40	1.9		1.05133	NO	Deceased		0		NO							Insufficient follow-up
943	Cancer of unknown primary	CUP (Mesothelioma)		2	ipilimumab-nivolumab; carboplatin-pemetrexed		3	0		0			0	0			LATS2 inact mut; CDKN2A del; DIAPH2 inact part del		42	1.4		1.577	NO	Deceased		1	carboplatin-pemetrexed	NO							No actionable biomarkers detected
944	Known primary tumour	Soft tissue (Spindle cell sarcoma)		0			1	0		0			0	0			BAP1 inact mut; CDKN2A del		35	1.9		0.131417	NO	BSC		0		NO							No actionable biomarkers detected
945	Known primary tumour	Lung (NSCLC)		2	alectinib; lorlatinib		4	1		0			1	0	ALK fus		CHEK2 inact mut; CDKN2A del; PTPRD inact part del		51	2.7		8.08214	YES			1	carboplatin-pemetrexed	NO							Standard-of-care biomarker was already treated before WGS
946	Known primary tumour	Lung (NSCLC)		3	osimertinib; carboplatin-pemetrexed; osimertinib retreatment		8	3		2	PTEN del; PIK3CA act mut		1	0	EGFR act mut		APC inact mut; TP53 loss; RMB10 inact; CDKN2A part del; RUNX1 part del		73	3.5		5.71663	YES			1	patritumab-deruxtecan (M19UNS)	NO							Ongoing response on previous treatment/complete remission
949	Known primary tumour	Thymus		0			3	1		1	PIK3CA act mut		0	0			SF3B1 act mut; KDM6A inact mut		16	0.7		6.73511	YES			0		NO							No actionable standard-of-care biomarkers
952	Known primary tumour	Lung (NSCLC)		2	carboplatin-pemetrexed-pembrolizumab; pembrolizumab mono		4	1		1	TML high		0	0			TP53 inact mut; STK11 inact part del; RB1 inact homoz disrup		232	12.8		0.197125	NO	Other hospital referral		1	docetaxel	NO							Insufficient follow-up
953	Known primary tumour	Soft tissue (Spindle cell sarcoma)		0			0	0		0			0	0					44	2		6.99795	YES			0		NO							No actionable standard-of-care biomarkers
954	Known primary tumour	Soft tissue (Liposarcoma)		0			2	2		2	CDK4 amp; MDM2 amp		0	0					42	2.3		5.35524	YES			2	BI907828 (M22BRL); doxorubicine	YES	MDM2	BI 907828 (brigimadlin)	Experimental trial	Brightline-1	NCT05218599	II/III	No actionable standard-of-care biomarkers
956	Cancer of unknown primary	CUP (Skin; Merkel cell carcinoma)		0			0	0		0			0	0			Merkel cell polyomavirus		27	1.5		7.91786	YES			1	avelumab	NO							No actionable biomarkers detected
958	Known primary tumour	Soft tissue (Radiation-induced breast sarcoma)		0			0	0		0			0	0					12	0.5		4.92813	YES			0		NO							No actionable standard-of-care biomarkers
959	Known primary tumour	Soft tissue (Spindle cell sarcoma)		0			3	1		1	PTEN inact part del		0	0			TP53 inact mut; CDKN2A inact part del		62	2.6		6.83368	YES			0		NO							No actionable standard-of-care biomarkers
960	Known primary tumour	Colorectum (Caecum)		4	FOLFOXIRI-B; FUDR; FOLFIRI; FUDR		4	2		1	PIK3CA act mut		1	0	KRAS present		TP53 inact mut; CTNNB1 del		108	6.7		7.16222	YES			1	CAPOX	YES	KRAS present	no EGFR inhibitor	Reimbursed care				Actionable standard-of-care biomarker was treated
961	Known primary tumour	Lung (NSCLC)		0			3	1		1	ARID1A inact mut		0	0			CTNNB1 act mut; DICER1 inact mut		12	0.6		0	NO	Second opinion		0		NO							Insufficient follow-up
962	Known primary tumour	Brain/CNS (Esthesioneuroblastoma)		0			1	0		0			0	0			DMD inact part del		16	0.9		6.47228	YES			0		NO							No actionable standard-of-care biomarkers
963	Known primary tumour	Kidney (Papillary RCC)		0			2	0		0			0	0			TERTp act mut; CDKN2A del		46	2		7.16222	YES			0	cabozantinib-nivolumab	NO							No actionable standard-of-care biomarkers
965	Known primary tumour	Prostate		4	gosereline; docetaxel; abiraterone-prednison; cabazitaxel-carboplatin		5	1		1	PTEN inact part del		0	0			TP53 inact mut; TMPRSS2-ERG fus; RB1 inact part del; MSH6 mono-allelic		46	2.4		3.94251	YES			0		NO							No actionable standard-of-care biomarkers
966	Cancer of unknown primary	CUP (Definitive CUP; possibly Small intestine)		0			7	2		2	CCND1 amp; TML high		0	0			TP53 inact mut; CDKN2A del; FGF3 amp; GMDS inact part del; GATA6 amp		175	17.1		4.13963	YES			0		NO							No actionable standard-of-care biomarkers
967	Known primary tumour	Mesothelioma		0			1	0		0			0	0			BAP1 inact mut; CDKN2A del		22	1.1		3.21971	YES			1	ipilimumab-nivolumab	NO							No actionable standard-of-care biomarkers
968	Known primary tumour	Bone (Chondrosarcoma)		0			0	0		0			0	0					16	1.1		7.19507	YES			0		NO							No actionable standard-of-care biomarkers
969	Known primary tumour	Colorectum (Rectum)		2	CAPOX-B; FOLFIRI		5	3		1	TML high		1	1	BRAF V600E act mut; KRAS absent		APC inact mut; TP53 inact mut; SMAD4 inact mut		224	9.7		7.26078	YES			3	FOLFIRI; encorafenib-cetuximab; ipilimumab-nivolumab (DRUP)	YES	(1.) BRAF; (2.) TML	(1.) encorafenib-binimetinib; (2.) ipilimumab-nivolumablumab	(1.) Reimbursed care; (2.) Experimental trial	(2.) DRUP (M15DRU)		II	Actionable standard-of-care biomarker was treated
973	Known primary tumour	Kidney (Oncocytoma)		0			1	0		0			0	0			RPL5 mut VUS		9	0.3		7.62218	YES			0		NO							No actionable standard-of-care biomarkers
974	Known primary tumour	Kidney (Oncocytoma)		0			3	0		0			0	0			TSC2 mut VUS; NCOA2 mut VUS; POLD1 mut VUS		16	0.8		7.42505	YES			0		NO							No actionable standard-of-care biomarkers
975	Known primary tumour	Soft tissue (Uterine sarcoma)		2	doxorubicine; trabectedine		1	0		0			0	0			KRAS mut VUS		35	2.8		7.19507	YES			3	trabectedine; DTIC; gemcitabine	NO							No actionable standard-of-care biomarkers
976	Known primary tumour	Colorectum (Colon)		2	FOLFOXIRI-B; capecitabine-B		5	2		1	KRAS act mut		1	0	KRAS present		TP53 inact mut; APC inact mut; SMAD4 inact mut; SMARCB1 inact part del		73	4.2		3.44969	YES			1	FOLFOXIRI-B	YES	KRAS present	no EGFR inhibitor	Reimbursed care				Actionable standard-of-care biomarker was treated
977	Known primary tumour	Ovary (High grade serous carcinoma)		1	carboplatin-paclitaxel		2	0		0			0	0			TP53 inact mut; MET fus		43	1.9		5.15811	YES			0		NO							No actionable standard-of-care biomarkers
979	Cancer of unknown primary	CUP (Definitive CUP; possibly Small intestine; neuro-endocrine; NEC)		0			4	2		2	HRD no substrate; TML high		0	0			TP53 inact mut; RB1 inact part del; GNAS amp		152	7.6		5.4538	YES			1	carboplatin-etoposide	NO							No actionable standard-of-care biomarkers
980	Known primary tumour	Lung (NSCLC)		3	pembrolizumab (PAULIEN); carboplatin-pemetrexed; pemetrexed maintenance		2	0		0			0	0			BAP1 inact splice mut; TP53 inact mut		76	4.8		0.0657084	NO	Second opinion		1	paclitaxel-bevacizumab	NO							No actionable biomarkers detected

## Sheet: Supp T2B. SOC actionability
Biomarker	Variant types in dataset						Administered targeted drugs (if any)…				… in tumour types
ALK	fus						Alectinib (First-generation ALK/ROS1 inhibitor)	Crizotinib (Second-generation ALK/ROS1/MET inhibitor)	Lorlatinib (Third-generation ALK/ROS1 inhibitor)		Lung (NSCLC)
BRAF	V600E act mut	non-V600E act mut	fus				Dabrafenib (First-generation BRAF inhibitor)	Encorafenib (Second-generation BRAF inhibitor)	Trametinib (First-generation MEK/ERK inhibitor)	Binimetinib (First-generation MEK/ERK inhibitor)	Lung (NSCLC)
CCND1	amp
EGFR	act mut						Erlotinib (First-generation EGFR inhibitor)	Afatinib (Second-generation EGFR inhibitor)	Osimertinib (Third-generation EGFR inhibitor)		Lung (NSCLC)
ERBB2	amp						Trastuzumab (HER2 monoclonal antibody)	Tucatinib (HER2 inhibiting tyrosine kinase inhibitor)			Breast (ER positive, HER2 negative)	CUP (possibly upper GI)	Oesophagus/stomach
HRD signature	BRCA2 del	BRCA1 inact mut	RAD51B inact mut	BRCA2 inact mut	BRCA1 inact homozyg disrup	BRCA1 hypermethyl	Niraparib (First-generation PARP inhibitor)	Olaparib (First-generation PARP inhibitor)			Breast (ER positive, HER2 negative)	Ovary	Prostate
KIT	act mut
KRAS	present	absent					Panitumumab (EGFR inhibiting monoclonal antibody)				Lung (NSCLC)
MET	amp						Capmatinib (Second-generation MET inhibitor)				Lung (NSCLC)
MSI	MLH1 LOH	MLH1 inact mut	MSH2 inact mut	MSH6 inact mut	no substrate		Nivolumab (PD-1 inhibitor)	Pembrolizumab (PD-1 inhibitor)			Colorectum	CUP (Teratoma)
PIK3CA	act mut						Alpelisib (PI3K inhibitor)				Breast (ER positive, HER2 negative)
PTCH1	inact mut
RET	fus						Selpercatinib (RET inhibitor)				Lung (NSCLC)	Thyroid
ROS1	fus
TML/TMB	high						Pembrolizumab (PD-1 inhibitor)				Lung (Carcinoid; atypical carcinoid)

## Sheet: Supp T2C. Study actionability
Biomarker	Variant type in dataset									Administered targeted drugs…							… in tumour types
AKT1	act mut
ARID1A	inact mut
BRAF	act mut	V600E act mut	class III act mut	fus						Dabrafenib (first-generation BRAF inhibitor)	Vemurafenib (first-generation BRAF inhibitor)	Trametinib (First-generation MEK/ERK inhibitor)	Cobimetinib (first-generation MEK/ERK inhibitor)	Selumetinib (First-generation MEK/ERK inhibitor)	LTT462 (Next generation MEK/ERK inhibitor)	TNO155 (Next-generation MEK/ERK inhibitor)	Colorectum	CUP (possibly Ovary)	Lung (NSCLC)	Soft tissue (Solitary fibrous tumour)
CCND1/2/3	CCDN1 amp	CCND2 amp	CCND3 amp							Abemaciclib (CDK4/6 inhibitors)	Palbociclib (CDK4/6 inhibitor)						Lung (Carcinoid; atypical carcinoid)	Small intestine
CD274	amp
CDK4/6	CDK4 amp	CDK6 amp
CDKN2A	del	inact mut								Ribociclib (CDK4/6 inhibitor)							Salivary gland
CREBBP	inact part del
EGFR	fus	amp	act mut	part amp						Osimertinib (Third-generation EGFR inhibitor)	Gefitinib (First-generation EGFR inhibitor)	Dacomitinib (Second-generation EGFR inhibitor)	Necitumumab (First-generation EGFR monoclonal antibody)	BLU-945 (Next-generation EGFR inhibitor)			Bladder (UCC)	Lung (NSCLC)	Penis
EP300	inact mut
ERBB2	act mut	dup	amp	act mut; amp
FANCA	inact mut
FGFR1/2/3	FGFR1 amp	FGFR1 fus	FGFR2 act mut	FGFR2 amp	FGFR2 fus	FGFR3 act mut	FGFR3 fus			Erdafitinib (pan-FGFR inhibitor)	Lenvatinib (VEGFR/EGFR/PDGFR/KIT inhibitor)						Bladder (UCC)	Biliary tract
FLT3	amp
GNAS	act mut
HRD signature	no substrate	BRCA1 inact mut	BRCA1 del	BRCA2 inact mut	BRCA2 del	RAD51B inact mut	RAD51D inact mut	BRIP1 inact homozyg disrup		Talazoparib (Second-generation PARP inhibitor)							Breast (TNBC)	Lung (NSCLC)	Ovary
HRR genes without HRD	ATM inact mut	ATM del	ATM inact splice mut	BRCA1 inact mut	BRCA2 inact mut	CHEK2 inact mut	RAD51B inact homozyg disrup	RAD51B loss	RAD51B inact part del	Olaparib (First-generation PARP inhibitor)	Rucaparib (Second-generation PARP inhibitor)	Talazoparib (Second-generation PARP inhibitor)					Prostate
K/H/NRAS	KRAS act mut	KRAS amp	NRAS act mut							JDQ443 (Opnurasib; KRAS G12C inhibitor)							GIST
KIT/KDR/PDGFRA	KIT act mut	KIT amp	KIT/PDGFRA coamp	KIT/KDR/PDGFRA coamp
KMT2C	inact mut
MAP2K1/4	MAP2K1 inact mut	MAP2K4 inact mut								Trametinib (First-generation MEK/ERK inhibitor)							Soft tissue (Sarcoma NOS)
MDM2	amp									BI 907828 (Brigimadlin; MDM2 inhibitor)							Soft tissue (Liposarcoma)
MET	amp	act mut								Savolitinib (First-generation MET inhibitor)							Lung (NSCLC)	Oesophagus/Stomach	Uterus/endometrium
MSI	no substrate	inact part del	del	inact mut	MLH1+PMS2 inact mut	MLH1 inact mut				Nivolumab (PD-1 inhibitor)							Small intestine	Uterus/endometrium
MYC	amp
NF1	inact mut	del	inact splice mut	inact homozyg disrup	inact part del					Trametinib (First-generation MEK/ERK inhibitor)							Ovary
NF2	inact mut
NOTCH2	act mut
NRG1	fus
NTRK1/2/3	NTRK1 fus	NTRK2 fus	NTRK3 fus							Entrectinib (ROS1/NTRK inhibitor)	Larotrectinib (ROS1/NTRK inhibitor)	Repotrectinib (ROS1/NTRK inhibitor)					Breast (ER positive, HER2 negative)	Breast (TNBC)	Lung (NSCLC)
PDGFRB	act mut
PIK3CA	act mut									Alpelisib (PI3K inhibitor)							Breast (TNBC)	Salivary gland
PIK3R1	inact mut	inact part del
PPP2R3A	inact mut	del
PTCH1	inact part del
PTEN	del		inact mut	inact part del	inact homozyg disrup	inact splice mut				Alpelisib (PI3K inhibitor)							Prostate
RAF1	act mut	amp
RASA1	inact mut
RET	act mut	fus
RNF43	inact mut	del	inact part del
ROS1	fus									Lorlatinib (ALK/ROS1 inhibitor)	Repotrectinib (ROS1/NTRK inhibitor)						Lung (NSCLC)
SMARCA4	inact mut	del
TML/TMB	high									Pembrolizumab (PD-1 inhibitor)	Nivolumab (PD-1 inhibitor)	Ipililumab (CTLA-4 inhibitor)					Breast (ER positive, HER2 negative)	Colorectum	Head and neck (SCC)	Lung (NSCLC)	Ovary	Skin (SCC)	Skin adnex	Soft tissue (Angiosarcoma)
TSC1/2	del	inact mut	inact splice mut
TSC2	inact mut
VHL	inact mut

## Sheet: Supp T2D. Indications
Tumor_Type	Biomarker	Total_Indications	Experimental_Indications	Reimbursed_Indications
Anus		0	0	0
Benign tumour		0	0	0
Biliary tract	IDH1	1	1	0
Bladder	TML/TMB-high	7	7	0
Bladder	EGFR	2	2	0
Bladder	FGFR1/2/3	2	2	0
Bladder	CCND1/2/3	1	1	0
Bladder	TSC1	1	1	0
Bladder	RAF1	1	1	0
Bladder	PIK3CA	1	1	0
Bladder	CDKN2A	1	1	0
Bladder	MDM2	1	1	0
Bone		0	0	0
Brain/CNS	EGFR	1	1	0
Brain/CNS	PTEN	1	1	0
Breast	PTEN	12	12	0
Breast	CCND1/2/3	13	11	2
Breast	PIK3CA	28	10	18
Breast	TML/TMB-high	10	10	0
Breast	FGFR1/2/3	7	7	0
Breast	MAPK pathway	7	7	0
Breast	HRD (no substrate)	6	6	0
Breast	NF1	6	6	0
Breast	CDK1/4/6	4	4	0
Breast	PIK3R1	4	4	0
Breast	HRD+substrate	5	2	3
Breast	ERBB2/3/4	5	2	3
Breast	MYC	2	2	0
Breast	AKT1	2	2	0
Breast	CHEK2	2	2	0
Breast	NTRK1/2/3/4	2	2	0
Breast	PPP2R2A/3A	1	1	0
Breast	KMT2C	1	1	0
Breast	KIT/KDR/PDGFRA	1	1	0
Breast	CD274	1	1	0
Breast	BRAF	1	1	0
Breast	CREBBP	1	1	0
Breast	EGFR	1	1	0
Breast	NOTCH2	1	1	0
Breast	AR	1	1	0
Cervix	TML/TMB-high	3	3	0
Cervix	PIK3CA	3	3	0
Cervix	HRD+substrate	1	1	0
Cervix	PTEN	1	1	0
Colorectum	KRAS	22	9	13
Colorectum	TML/TMB-high	6	6	0
Colorectum	PIK3CA	4	4	0
Colorectum	ERBB2/3/4	4	3	1
Colorectum	BRAF	7	2	5
Colorectum	RNF43	2	2	0
Colorectum	MAPK pathway	2	2	0
Colorectum	FGFR1/2/3	2	2	0
Colorectum	FLT3	2	2	0
Colorectum	CCND1/2/3	2	2	0
Colorectum	GNAS	1	1	0
Colorectum	ATM	1	1	0
Colorectum	HRD (no substrate)	1	1	0
Colorectum	RET	1	1	0
Colorectum	NF1	1	1	0
Colorectum	KRAS absence	22	0	22
Colorectum	MSI+substrate	1	0	1
CUP	TML/TMB-high	45	45	0
CUP	KRAS	19	15	4
CUP	PTEN	12	12	0
CUP	PIK3CA	7	7	0
CUP	HRD (no substrate)	6	6	0
CUP	CCND1/2/3	5	5	0
CUP	BRAF	5	5	0
CUP	MAPK pathway	5	5	0
CUP	NRAS	3	3	0
CUP	CDKN2A	3	3	0
CUP	RNF43	3	3	0
CUP	ERBB2/3/4	5	3	2
CUP	MYC	3	3	0
CUP	CD274	3	3	0
CUP	HRD+substrate	4	2	2
CUP	RAF1	2	2	0
CUP	MDM2	2	2	0
CUP	CHEK2	2	2	0
CUP	AKT1	2	2	0
CUP	NF1	2	2	0
CUP	EGFR	2	1	1
CUP	FGFR1/2/3	1	1	0
CUP	MSI+substrate	2	1	1
CUP	ARID1A	1	1	0
CUP	ATM	1	1	0
CUP	RAD51B	1	1	0
CUP	EP300	0	1	0
CUP	MET	1	1	0
CUP	FANCA/FANCF	1	1	0
CUP	KRAS absence	6	0	6
CUP	ALK	1	0	1
CUP	PTCH1	1	0	1
GIST	CDKN2A	1	1	0
GIST	KIT/KDR/PDGFRA	2	1	1
GIST	NF1	1	1	0
GIST	PIK3CA	1	1	0
Head and neck	TML/TMB-high	4	4	0
Head and neck	KRAS	1	1	0
Head and neck	CCND1/2/3	1	1	0
Head and neck	CHEK2	1	1	0
Head and neck	PTCH1	1	0	1
Kidney	VHL	1	1	0
Liver	PTEN	1	1	0
Lung (NSCLC)	TML/TMB-high	44	44	0
Lung (NSCLC)	KRAS	15	14	1
Lung (NSCLC)	CDKN2A	9	9	0
Lung (NSCLC)	PIK3CA	9	9	0
Lung (NSCLC)	CDK1/4/6	9	9	0
Lung (NSCLC)	PTEN	7	7	0
Lung (NSCLC)	NF1	6	6	0
Lung (NSCLC)	EGFR	72	5	67
Lung (NSCLC)	CCND1/2/3	5	5	0
Lung (NSCLC)	HRD (no substrate)	5	5	0
Lung (NSCLC)	MET	12	4	8
Lung (NSCLC)	MDM2	4	4	0
Lung (NSCLC)	ERBB2/3/4	5	3	2
Lung (NSCLC)	MAPK pathway	3	3	0
Lung (NSCLC)	BRAF	11	2	9
Lung (NSCLC)	ROS1	3	2	1
Lung (NSCLC)	FGFR1/2/3	2	2	0
Lung (NSCLC)	HRD+substrate	2	2	0
Lung (NSCLC)	SMARCA4	2	2	0
Lung (NSCLC)	ARID1A	2	2	0
Lung (NSCLC)	MYC	2	2	0
Lung (NSCLC)	KIT/KDR/PDGFRA	1	1	0
Lung (NSCLC)	RAF1	1	1	0
Lung (NSCLC)	ATM	1	1	0
Lung (NSCLC)	NRAS	1	1	0
Lung (NSCLC)	CHEK2	1	1	0
Lung (NSCLC)	PIK3R1	1	1	0
Lung (NSCLC)	BRCA2	1	1	0
Lung (NSCLC)	NTRK1/2/3/4	1	1	0
Lung (NSCLC)	RAD51B	1	1	0
Lung (NSCLC)	RET	3	0	3
Lung (NSCLC)	ALK	11	0	11
Lung (SCLC)	TML/TMB-high	6	4	2
Lung (SCLC)	PTEN	4	4	0
Lung (SCLC)	MSI+substrate	2	2	0
Lung (SCLC)	CCND1/2/3	2	2	0
Lung (SCLC)	ATM	2	2	0
Lung (SCLC)	MDM2	1	1	0
Lung (SCLC)	TSC1	1	1	0
Lung (SCLC)	ARID1A	1	1	0
Lung (SCLC)	CDKN2A	1	1	0
Lung (SCLC)	CDK1/4/6	1	1	0
Lung (SCLC)	BRAF	1	0	1
Lung (SCLC)	EGFR	1	0	1
Melanoma	TML/TMB-high	5	4	1
Melanoma	NRAS	1	1	0
Melanoma	PTEN	1	1	0
Melanoma	MDM2	1	1	0
Melanoma	KIT/KDR/PDGFRA	1	1	0
Melanoma	BRAF	2	0	2
Mesothelioma	CDKN2A	3	3	0
Mesothelioma	HRD+substrate	3	3	0
Mesothelioma	NF2	1	1	0
Mesothelioma	RET	1	1	0
Mesothelioma	FANCA/FANCF	1	1	0
Myeloproliferative neoplasm	NRAS	1	1	0
Oesophagus/Stomach	TML/TMB-high	4	4	0
Oesophagus/Stomach	CDK1/4/6	2	2	0
Oesophagus/Stomach	MET	2	2	0
Oesophagus/Stomach	CCND1/2/3	1	1	0
Oesophagus/Stomach	KRAS	1	1	0
Oesophagus/Stomach	CDKN2A	1	1	0
Oesophagus/Stomach	MAPK pathway	1	1	0
Oesophagus/Stomach	ATM	1	1	0
Oesophagus/Stomach	MDM2	1	1	0
Oesophagus/Stomach	PTEN	1	1	0
Oesophagus/Stomach	ERBB2/3/4	5	0	5
Ovary	MAPK pathway	3	3	0
Ovary	KRAS	3	3	0
Ovary	HRD (no substrate)	2	2	0
Ovary	NF1	2	2	0
Ovary	TML/TMB-high	2	2	0
Ovary	NRAS	2	2	0
Ovary	NRAS	2	2	0
Ovary	NRG1	1	1	0
Ovary	PIK3CA	1	1	0
Ovary	PIK3R1	1	1	0
Ovary	CDKN2A	1	1	0
Ovary	HRD+substrate	4	0	4
Pancreas	KRAS	2	2	0
Pancreas	PIK3CA	1	1	0
Pancreas neuro-endocrine	NF1	1	1	0
Pancreas neuro-endocrine	RNF43	1	1	0
Pancreas neuro-endocrine	TSC2	1	1	0
Penis	MAPK pathway	0	1	0
Penis	EGFR	0	1	0
Penis	MDM2	0	1	0
Penis	PIK3CA	0	1	0
Prostate	PTEN	19	19	0
Prostate	PIK3CA	3	3	0
Prostate	AR	3	3	0
Prostate	CCND1/2/3	2	2	0
Prostate	ATM	2	2	0
Prostate	FGFR1/2/3	1	1	0
Prostate	RAD51B	1	1	0
Prostate	TML/TMB-high	1	1	0
Prostate	PPP2R2A/3A	1	1	0
Prostate	BRAF	1	0	1
Prostate	HRD+substrate	2	0	2
Prostate neuro-endocrine		0	0	0
Salivary gland	PIK3CA	2	2	0
Salivary gland	EGFR	1	1	0
Salivary gland	CCND1/2/3	1	1	0
Salivary gland	CDKN2A	1	1	0
Skin	TML/TMB-high	2	2	0
Skin	EGFR	1	0	1
Skin adnex	TML/TMB-high	1	1	0
Skin adnex	KRAS	1	1	0
Small intestine	TML/TMB-high	1	1	0
Small intestine	ERBB2/3/4	1	1	0
Small intestine	MSI+substrate	1	1	0
Small intestine	CCND1/2/3	1	1	0
Soft tissue	CDK1/4/6	9	9	0
Soft tissue	PTEN	7	7	0
Soft tissue	MDM2	7	7	0
Soft tissue	NF1	4	4	0
Soft tissue	TML/TMB-high	3	3	0
Soft tissue	FGFR1/2/3	3	3	0
Soft tissue	PIK3CA	2	2	0
Soft tissue	HRD (no substrate)	2	2	0
Soft tissue	BRAF	2	2	0
Soft tissue	HRD+substrate	1	1	0
Soft tissue	RAF1	1	1	0
Soft tissue	MSI (no substrate)	1	1	0
Soft tissue	BRCA2	1	1	0
Soft tissue	PTCH1	1	1	0
Soft tissue	CHEK2	1	1	0
Soft tissue	EGFR	1	1	0
Soft tissue	MAPK pathway	1	1	0
Soft tissue	TSC2	1	1	0
Soft tissue	KIT/KDR/PDGFRA	1	1	0
Testis	HRD (no substrate)	1	1	0
Testis	CCND1/2/3	1	1	0
Thymus	PIK3CA	1	1	0
Thyroid	RET	1	1	0
Thyroid	BRAF	1	0	1
Urachus	KIT/KDR/PDGFRA	1	1	0
Urachus	FLT3	1	1	0
Urinary tract	TML/TMB-high	4	3	1
Urinary tract	TSC1	2	2	0
Urinary tract	RAF1	2	2	0
Urinary tract	BRAF	2	2	0
Urinary tract	MDM2	1	1	0
Urinary tract	ARID1A	1	1	0
Urinary tract	CCND1/2/3	1	1	0
Urinary tract	PDGFRB	1	1	0
Urinary tract	PIK3CA	1	1	0
Urinary tract	FGFR1/2/3	1	1	0
Urinary tract	HRD+substrate	1	1	0
Urinary tract	PTEN	1	1	0
Urinary tract	ATK1	1	1	0
Urinary tract	EGFR	1	1	0
Urinary tract	HRD (no substrate)	1	1	0
Urinary tract	MYC	1	1	0
Urinary tract	KRAS	1	1	0
Urinary tract	CDKN2A	1	1	0
Uterus/Endometrium	PTEN	6	6	0
Uterus/Endometrium	PIK3R1	2	2	0
Uterus/Endometrium	TML/TMB-high	2	2	0
Uterus/Endometrium	MSI (no substrate)	2	2	0
Uterus/Endometrium	HRD+substrate	2	2	0
Uterus/Endometrium	FGFR1/2/3	2	2	0
Uterus/Endometrium	KIT/KDR/PDGFRA	1	1	0
Uterus/Endometrium	ATM	1	1	0
Uterus/Endometrium	PIK3CA	1	1	0
Uterus/Endometrium	MET	1	1	0
Uterus/Endometrium	KRAS	1	1	0
Uterus/Endometrium	NF1	1	1	0
Vagina	TML/TMB-high	1	1	0
Vulva	CCND1/2/3	1	1	0

## Sheet: Supp T3. CUP analysis
Sample ID	Diagnosis category	WGS-based CUP prediction algorithm solution	Diagnosis after CUP analysis	>3mo follow-up for CUP treatment analysis	WGS-guided treatment
7	Cancer of unknown primary	Diagnosis given with high certainty	Biliary tract	NO	NO
12	Cancer of unknown primary	Diagnosis given with high certainty	Colorectum (Colon)	YES	YES, tumour type specific negative predictive target
14	Cancer of unknown primary	Case not fully solved by WGS	Definitive CUP; possibly Anus	YES	NO
23	Cancer of unknown primary	Diagnosis given with high certainty	Soft tissue (Desmoplastic small round cell tumour)	YES	YES, tumour type specific non-targeted treatment
26	Cancer of unknown primary	Diagnosis indicated with lower certainty by WGS	Ovary	YES	YES, tumour type specific targeted standard-of-care treatment
32	Cancer of unknown primary	Diagnosis indicated with lower certainty by WGS	Biliary tract	YES	YES, tumour type specific non-targeted treatment
34	Cancer of unknown primary	Diagnosis given with high certainty	Biliary tract	YES	NO
41	Cancer of unknown primary	Case not fully solved by WGS	Definitive CUP; possibly Cervix	YES	YES, tumour type informed non-targeted treatment
87	Cancer of unknown primary	Diagnosis indicated with lower certainty by WGS	Head and neck; SCC	YES	NO
88	Cancer of unknown primary	Case not fully solved by WGS	Definitive CUP; possibly Lung (NSCLC)	YES	YES, tumour type informed non-targeted treatment
90	Cancer of unknown primary	Case not fully solved by WGS	Definitive CUP; possibly Colorectum	NO	YES, tumour type informed experimental trial target
92	Cancer of unknown primary	Case not fully solved by WGS	Definitive CUP; possibly Colorectum	NO	NO
94	Cancer of unknown primary	Diagnosis given with high certainty	Biliary tract	YES	YES, tumour type specific targeted experimental trial
121	Cancer of unknown primary	Case not fully solved by WGS	Definitive CUP; possibly Upper GI/pancreas	NO	NO
155	Cancer of unknown primary	Diagnosis given with high certainty	Oesophagus/stomach (Stomach; signet ring)	NO	NO
156	Cancer of unknown primary	Diagnosis given with high certainty	Lung (NSCLC)	NO	NO
177	Cancer of unknown primary	Diagnosis given with high certainty	Bladder (UCC)	YES	YES, tumour type specific non-targeted treatment
179	Cancer of unknown primary	Diagnosis given with high certainty	Lung (NSCLC)	NO	YES, tumour type specific non-targeted treatment
185	Cancer of unknown primary	Diagnosis indicated with lower certainty by WGS	Head and neck (SCC)	YES	NO
205	Cancer of unknown primary	Case not fully solved by WGS	Definitive CUP; possibly Ovary (Mucinous adenocarcinoma)	NO	NO
211	Cancer of unknown primary	Case not fully solved by WGS	Definitive CUP; possibly Lung (NSCLC)	NO	NO
219	Cancer of unknown primary	Diagnosis given with high certainty	Lung (NSCLC)	NO	YES, tumour type specific non-targeted treatment
227	Cancer of unknown primary	Case not fully solved by WGS	Definitive CUP; possibly Head and neck (SCC)	YES	NO
234	Cancer of unknown primary	Case not fully solved by WGS	Definitive CUP; possibly Cervix (SCC)	NO	NO
237	Cancer of unknown primary	Case not fully solved by WGS	Definitive CUP; possibly Upper GI	YES	YES, tumour type informed non-targeted treatment
249	Cancer of unknown primary	Case not fully solved by WGS	Definitive CUP; possibly Upper GI	NO	NO
251	Cancer of unknown primary	Diagnosis given with high certainty	Lung (NSCLC)	YES	YES, tumour type specific non-targeted treatment
256	Cancer of unknown primary	Diagnosis indicated with lower certainty by WGS	Lung (NSCLC)	NO	NO
260	Cancer of unknown primary	Diagnosis indicated with lower certainty by WGS	Ovary	NO	NO
266	Cancer of unknown primary	Diagnosis given with high certainty	Skin adnex	YES	YES, tumour type specific targeted experimental trial
268	Cancer of unknown primary	Diagnosis given with high certainty	Breast (TNBC)	YES	YES, tumour type specific non-targeted treatment
272	Cancer of unknown primary	Diagnosis given with high certainty	Skin (Merkel cell carcinoma)	YES	YES, tumour type specific non-targeted treatment
283	Cancer of unknown primary	Case not fully solved by WGS	Definitive CUP; possibly Lung (NSCLC; carcinosarcoma)	NO	NO
284	Cancer of unknown primary	Diagnosis given with high certainty	Pancreas	NO	NO
297	Cancer of unknown primary	Diagnosis given with high certainty	Oesophagus/stomach	NO	NO
300	Cancer of unknown primary	Diagnosis given with high certainty	Pancreas)	NO	NO
357	Cancer of unknown primary	Case not fully solved by WGS	Definitive CUP; possibly Anogenital (SCC)	YES	NO
381	Cancer of unknown primary	Case not fully solved by WGS	Definitive CUP; possibly Ovary	YES	NO
395	Cancer of unknown primary	Case not fully solved by WGS	Definitive CUP; possibly Urinary tract	NO	NO
397	Cancer of unknown primary	Case not fully solved by WGS	Definitive CUP; possibly Urinary tract	NO	NO
420	Cancer of unknown primary	Diagnosis given with high certainty	Prostate	YES	YES, tumour type specific non-targeted treatment
442	Cancer of unknown primary	Diagnosis given with high certainty	Skin (SCC)	YES	NO
444	Cancer of unknown primary	Case not fully solved by WGS	Definitive CUP; possibly Upper GI	NO	NO
446	Cancer of unknown primary	Diagnosis given with high certainty	Lung (SCLC)	YES	YES, tumour type specific non-targeted treatment
487	Cancer of unknown primary	Case not fully solved by WGS	Definitive CUP; possibly Biliary tract	NO	NO
488	Cancer of unknown primary	Case not fully solved by WGS	Definitive CUP; possibly Anogenital	NO	NO
495	Cancer of unknown primary	Diagnosis indicated with lower certainty by WGS	Kidney (RCC)	NO	NO
500	Cancer of unknown primary	Case not fully solved by WGS	Definitive CUP; possibly Small intestine (Duodenum)	YES	YES, tumour type informed non-targeted treatment
509	Cancer of unknown primary	Diagnosis given with high certainty	Skin (SCC)	YES	YES, tumour type specific targeted experimental trial
513	Cancer of unknown primary	Diagnosis indicated with lower certainty by WGS	Oesophagus/stomach	NO	NO
520	Cancer of unknown primary	Case not fully solved by WGS	Definitive CUP; possibly Teratoma (Dedifferentiated)	YES	YES, tumour type informed targeted experimental trial
526	Cancer of unknown primary	Case not fully solved by WGS	Definitive CUP; possibly Upper GI	NO	NO
529	Cancer of unknown primary	Case not fully solved by WGS	Definitive CUP; possibly Upper GI/Thymus	YES	YES, tumour type informed targeted standard-of-care treatment
531	Cancer of unknown primary	Diagnosis given with high certainty	Lung (NSCLC)	NO	NO
540	Cancer of unknown primary	Diagnosis given with high certainty	Lung (NSCLC)	YES	YES, tumour type specific non-targeted treatment
542	Cancer of unknown primary	Diagnosis given with high certainty	Biliary tract	NO	NO
543	Cancer of unknown primary	Diagnosis given with high certainty	Colorectum (Colon)	YES	YES, tumour type specific negative predictive target
551	Cancer of unknown primary	Diagnosis indicated with lower certainty by WGS	Pancreas	YES	YES, tumour type specific non-targeted treatment
552	Cancer of unknown primary	Diagnosis indicated with lower certainty by WGS	Biliary tract	NO	NO
559	Cancer of unknown primary	Diagnosis given with high certainty	Lung (NSCLC)	YES	YES, tumour type specific targeted experimental trial
584	Cancer of unknown primary	Case not fully solved by WGS	Definitive CUP; possibly Colorectum	NO	NO
589	Cancer of unknown primary	Diagnosis given with high certainty	Lung (NSCLC)	YES	YES, tumour type specific non-targeted treatment
595	Cancer of unknown primary	Case not fully solved by WGS	Definitive CUP; possibly Anogenital	YES	YES, definitive CUP treatment
615	Cancer of unknown primary	Diagnosis given with high certainty	Lung (NSCLC)	NO	YES, tumour type specific non-targeted treatment
625	Cancer of unknown primary	Case not fully solved by WGS	Definitive CUP; possibly Pancreas	NO	NO
626	Cancer of unknown primary	Diagnosis given with high certainty	Prostate	NO	NO
634	Cancer of unknown primary	Diagnosis given with high certainty	Lung (NSCLC)	NO	YES, tumour type specific non-targeted treatment
643	Cancer of unknown primary	Case not fully solved by WGS	Definitive CUP	NO	NO
653	Cancer of unknown primary	Diagnosis given with high certainty	Pancreas	NO	NO
659	Cancer of unknown primary	Case not fully solved by WGS	Definitive CUP; possibly Bladder (Signet ring)	NO	NO
662	Cancer of unknown primary	Diagnosis given with high certainty	Skin (Merkel cell carcinoma)	YES	NO
673	Cancer of unknown primary	Case not fully solved by WGS	Definitive CUP; possibly Ovary (High grade serous carcinoma)	YES	YES, tumour type informed targeted experimental trial
692	Cancer of unknown primary	Case not fully solved by WGS	Definitive CUP; possibly Head and neck	YES	YES, definitive CUP treatment
696	Cancer of unknown primary	Case not fully solved by WGS	Definitive CUP; possibly Lower GI	NO	YES, tumour type informed non-targeted treatment
701	Cancer of unknown primary	Case not fully solved by WGS	Definitive CUP; possibly Prostate	NO	YES, tumour type informed non-targeted treatment
707	Cancer of unknown primary	Diagnosis given with high certainty	Lung (NSCLC)	NO	NO
712	Cancer of unknown primary	Case not fully solved by WGS	Definitive CUP; possibly Breast	NO	NO
715	Cancer of unknown primary	Diagnosis given with high certainty	Lung (NSCLC)	NO	YES, tumour type specific standard-of-care target
729	Cancer of unknown primary	Diagnosis indicated with lower certainty by WGS	Colorectum (Colon)	NO	YES, tumour type specific non-targeted treatment
732	Cancer of unknown primary	Diagnosis given with high certainty	Lung (NSCLC)	YES	YES, tumour type specific non-targeted treatment
737	Cancer of unknown primary	Case not fully solved by WGS	Definitive CUP; possibly Uterus/Endometrium	NO	YES, tumour type informed non-targeted treatment
748	Cancer of unknown primary	Diagnosis indicated with lower certainty by WGS	Breast (TNBC)	NO	YES, tumour type specific non-targeted treatment
750	Cancer of unknown primary	Case not fully solved by WGS	Definitive CUP (Signet ring)	YES	YES, definitive CUP treatment
751	Cancer of unknown primary	Case not fully solved by WGS	Definitive CUP (SCC)	YES	YES, tumour type informed targeted experimental trial
753	Cancer of unknown primary	Case not fully solved by WGS	Definitive CUP; possibly Lung (NSCLC)	YES	YES, tumour type informed targeted standard-of-care treatment
768	Cancer of unknown primary	Diagnosis given with high certainty	Lung (NSCLC)	NO	NO
773	Cancer of unknown primary	Case not fully solved by WGS	Definitive CUP; possibly Lung (NSCLC)	NO	NO
777	Cancer of unknown primary	Diagnosis given with high certainty	Biliary tract	YES	YES, tumour type specific non-targeted treatment
784	Cancer of unknown primary	Case not fully solved by WGS	Definitive CUP; possibly Lower GI	NO	NO
800	Cancer of unknown primary	Diagnosis indicated with lower certainty by WGS	Lung (NSCLC)	NO	NO
807	Cancer of unknown primary	Diagnosis given with high certainty	Penis	YES	YES, tumour type specific non-targeted experimental trial
815	Cancer of unknown primary	Diagnosis indicated with lower certainty by WGS	Colorectum	NO	YES, tumour type specific non-targeted treatment
823	Cancer of unknown primary	Diagnosis given with high certainty	Cervix	NO	NO
828	Cancer of unknown primary	Diagnosis given with high certainty	Lung (NSCLC)	NO	NO
835	Cancer of unknown primary	Diagnosis given with high certainty	Lung (SCLC)	NO	YES, tumour type specific non-targeted treatment
841	Cancer of unknown primary	Diagnosis given with high certainty	Lung (NSCLC)	NO	NO
842	Cancer of unknown primary	Diagnosis given with high certainty	Skin (BCC)	YES	NO
843	Cancer of unknown primary	Diagnosis given with high certainty	Colorectum (neuro-endocrine; NEC)	YES	YES, tumour type specific non-targeted treatment
848	Cancer of unknown primary	Diagnosis given with high certainty	Lung (NSCLC)	NO	NO
849	Cancer of unknown primary	Diagnosis given with high certainty	Skin (SCC)	YES	NO
850	Cancer of unknown primary	Diagnosis given with high certainty	Lung (NSCLC)	NO	NO
851	Cancer of unknown primary	Diagnosis given with high certainty	Lung (NSCLC)	NO	NO
852	Cancer of unknown primary	Case not fully solved by WGS	Definitive CUP; possibly Pancreas	NO	NO
857	Cancer of unknown primary	Diagnosis indicated with lower certainty by WGS	Colorectum	YES	YES, tumour type specific targeted standard-of-care treatment
858	Cancer of unknown primary	Diagnosis indicated with lower certainty by WGS	Pancreas (NEC)	NO	YES, tumour type specific non-targeted treatment
872	Cancer of unknown primary	Diagnosis given with high certainty	Skin (SCC)	YES	YES, tumour type specific targeted experimental trial
874	Cancer of unknown primary	Diagnosis indicated with lower certainty by WGS	Ovary (SCC)	YES	NO
887	Cancer of unknown primary	Diagnosis given with high certainty	Oesophagus/stomach (Oesophagus)	NO	YES, tumour type specific non-targeted treatment
888	Cancer of unknown primary	Case not fully solved by WGS	Definitive CUP; possibly Pancreas (Neuro-endocrine; LCNEC)	YES	YES, tumour type informed non-targeted treatment
892	Cancer of unknown primary	Case not fully solved by WGS	Definitive CUP; possibly Lower GI	YES	YES, tumour type informed negative predictive target
894	Cancer of unknown primary	Diagnosis given with high certainty	Lung (NSCLC)	YES	NO
897	Cancer of unknown primary	Diagnosis given with high certainty	Ovary	NO	NO
902	Cancer of unknown primary	Diagnosis given with high certainty	Biliary tract	YES	YES, tumour type specific non-targeted treatment
903	Cancer of unknown primary	Diagnosis given with high certainty	Lung (NSCLC)	NO	YES, tumour type specific non-targeted treatment
908	Cancer of unknown primary	Diagnosis given with high certainty	Skin adnex (Sebaceous gland cell)	YES	NO
909	Cancer of unknown primary	Diagnosis given with high certainty	Lung (SCLC)	NO	NO
913	Cancer of unknown primary	Diagnosis given with high certainty	Breast (TNBC)	NO	NO
926	Cancer of unknown primary	Case not fully solved by WGS	Definitive CUP; possibly Anogenital (SCC)	YES	YES, tumour type informed non-targeted treatment
929	Cancer of unknown primary	Diagnosis given with high certainty	Biliary tract (Adenocarcinoma)	NO	NO
943	Cancer of unknown primary	Diagnosis given with high certainty	Mesothelioma	NO	YES, tumour type specific non-targeted treatment
956	Cancer of unknown primary	Diagnosis given with high certainty	Skin (Merkel cell carcinoma)	YES	YES, tumour type specific non-targeted treatment
966	Cancer of unknown primary	Case not fully solved by WGS	Definitive CUP; possibly Small intestine	YES	YES, tumour type informed non-targeted treatment
979	Cancer of unknown primary	Case not fully solved by WGS	Definitive CUP; possibly Small intestine (Neuro-endocrine; NEC)	YES	YES, tumour type informed non-targeted treatment

## Sheet: Supp T4. PGV analysis
Sample ID	Diagnosis category	Tumour type (with subtype information or diagnosis after CUP, if available)		Germline analysis available	Clinical genetics PGV calling approach: old (until 1 Feb 2022), or new (from 10 Jan 2022 onwards)	Pathogenic germline alteration present	Germline variant; zygosity in tumour, tumour variant allele frequency	Remark clinical geneticist
1	Known primary tumour	Soft tissue (Spindle cell sarcoma)		YES	Old
2	Known primary tumour	Lung (NSCLC)		YES	Old
3	Known primary tumour	Lung (NSCLC)		YES	Old
5	Known primary tumour	Ovary (Embryonal cell carcinoma)		YES	Old
7	Cancer of unknown primary	CUP (Biliary tract)		YES	Old
8	Known primary tumour	Colorectum (Colon; signet cell)		YES	Old	YES, already known	ATM; biallelic, TVAF 100%
9	Known primary tumour	Lung (NSCLC)		YES	Old
12	Cancer of unknown primary	CUP (Colorectum; Colon)		YES	Old
14	Cancer of unknown primary	CUP (Definitive CUP; possibly Anus)		YES	Old
16	Known primary tumour	Lung (Carcinoid; atypical carcinoid)		YES	Old
17	Known primary tumour	Lung (NSCLC)		YES	Old
18	Known primary tumour	Lung (Carcinoid; atypical carcinoid)		YES	Old
20	Known primary tumour	Lung (NSCLC)		YES	Old
21	Known primary tumour	Lung (NSCLC)		YES	Old
22	Known primary tumour	Kidney (Sarcomatoid dedifferentiated RCC)		YES	Old
23	Cancer of unknown primary	CUP (Soft tissue; Desmoplastic small round cell tumour)		YES	Old
26	Cancer of unknown primary	CUP (Ovary)		YES	Old	YES, new finding	BRCA2; biallelic, TVAF 99%
27	Known primary tumour	Lung (NSCLC)		YES	Old
28	Known primary tumour	Lung (NSCLC)		YES	Old
30	Known primary tumour	Lung (LCNEC)		YES	Old
32	Cancer of unknown primary	CUP (Biliary tract)		YES	Old
33	Known primary tumour	Colorectum (Colon)		YES	Old	YES, already known	MSH6; mono-allelic, TVAF 26%	Mono-allelic, but due to MSI and somatic second hit considered biallelic
34	Cancer of unknown primary	CUP (Biliary tract)		YES	Old
35	Known primary tumour	Lung (LCNEC)		YES	Old
36	Known primary tumour	Lung (NSCLC)		YES	Old
41	Cancer of unknown primary	CUP (Definitive CUP; possibly Cervix)		YES	Old
42	Known primary tumour	Uterus/endometrium		YES	Old
44	Known primary tumour	Soft tissue (Solitary fibrous tumour)		YES	Old
45	Known primary tumour	Kidney (Clear cell RCC)		YES	Old
47	Known primary tumour	Ovary (High grade serous carcinoma)		YES	Old	YES, already known	BRCA1; biallelic, TVAF 87%
49	Known primary tumour	Breast (TNBC)		NO	Not available
50	Known primary tumour	Lung (NSCLC)		YES	Old
51	Known primary tumour	Lung (NSCLC)		YES	Old
52	Known primary tumour	Prostate		YES	Old
53	Known primary tumour	Soft tissue (Liposarcoma)		YES	Old
54	Known primary tumour	Soft tissue (High grade undifferentiated spindle cell/pleomorphic sarcoma)		YES	Old
55	Known primary tumour	Mesothelioma		YES	Old
56	Known primary tumour	Breast (ER positive, Her2 negative)		YES	Old
57	Known primary tumour	Mesothelioma		YES	Old
58	Known primary tumour	Lung (NSCLC)		YES	Old
59	Known primary tumour	Colorectum (Rectum)		YES	Old
61	Known primary tumour	Lung (Carcinoid; atypical carcinoid)		YES	Old
63	Known primary tumour	Colorectum (Colon)		YES	Old
64	Known primary tumour	Lung (NSCLC)		YES	Old
65	Known primary tumour	Lung (NSCLC)		YES	Old
67	Known primary tumour	GIST		YES	Old	YES, already known	SDHA; biallelic, TVAF 98%
68	Known primary tumour	Lung (NSCLC)		YES	Old
69	Known primary tumour	Mesothelioma		YES	Old
71	Known primary tumour	Melanoma		NO	Not available
73	Known primary tumour	Salivary gland (Acinary cell)		YES	Old
74	Known primary tumour	Small intestine (Jejunum)		YES	Old
75	Known primary tumour	Head and neck (Nasopharynx)		YES	Old
76	Known primary tumour	Lung (NSCLC)		YES	Old
77	Known primary tumour	Prostate		YES	Old
78	Known primary tumour	Prostate		YES	Old
79	Known primary tumour	Lung (NSCLC)		YES	Old
80	Known primary tumour	Mesothelioma		YES	Old
81	Known primary tumour	Thyroid (Mixed papillary/anaplastic carcinoma)		YES	Old
83	Known primary tumour	Uterus/endometrium		NO	Not available
84	Known primary tumour	Mesothelioma		YES	Old	YES, already known	BAP1; biallelic, TVAF 68%
85	Known primary tumour	Bladder (UCC)		YES	Old
86	Known primary tumour	Vagina (SCC)		YES	Old
87	Cancer of unknown primary	CUP (Head and neck; SCC)		YES	Old
88	Cancer of unknown primary	CUP (Definitive CUP; possibly Lung; NSCLC)		YES	Old
90	Cancer of unknown primary	CUP (Definitive CUP; possibly Colorectum)		YES	Old
91	Known primary tumour	Pancreas (neuro-endocrine; NET)		YES	Old
92	Cancer of unknown primary	CUP (Definitive CUP; possibly Colorectum)		YES	Old
93	Known primary tumour	GIST		YES	Old
94	Cancer of unknown primary	CUP (Biliary tract)		YES	Old
96	Known primary tumour	Oesophagus/stomach (Stomach)		YES	Old	YES, already known	CDH1; biallelic	Not in regular report due to low mTCP
97	Known primary tumour	Urinary tract (Urethra; adenocarcinoma)		YES	Old
98	Known primary tumour	Soft tissue (PEComa)		YES	Old	YES, already known	CHEK2; biallelic, TVAF 95%
99	Known primary tumour	Lung (NSCLC; sarcomatoid carcinoma)		YES	Old
100	Known primary tumour	Lung (NSCLC)		YES	Old
101	Known primary tumour	Soft tissue (Sarcoma NOS)		NO	Not available
103	Known primary tumour	Lung (NSCLC)		YES	Old
104	Known primary tumour	Lung (NSCLC)		YES	Old
106	Known primary tumour	Lung (NSCLC)		YES	Old
107	Known primary tumour	Colorectum (Colon)		NO	Not available
108	Known primary tumour	Lung (NSCLC)		YES	Old
109	Known primary tumour	Ovary (Transitional cell/high grade serous carcinoma)		YES	Old	YES, already known	BRCA1; mono-allelic, TVAF 52%	Mono-allelic, but due to HRD and somatic second hit considered biallelic
110	Known primary tumour	Lung (NSCLC)		YES	Old
111	Known primary tumour	Lung (NSCLC)		YES	Old
112	Known primary tumour	Colorectum (Colon)		YES	Old
113	Known primary tumour	Colorectum (Colon)		YES	Old
114	Known primary tumour	Lung (NSCLC)		YES	Old	YES, new finding	ATM; mono-allelic, TVAF 70%
115	Known primary tumour	Soft tissue (Small blue round cell tumour)		YES	Old
116	Known primary tumour	Lung (NSCLC)		YES	Old
117	Known primary tumour	Lung (NSCLC)		YES	Old
120	Known primary tumour	Uterus/endometrium (Carcinosarcoma)		YES	Old
121	Cancer of unknown primary	CUP (Definitive CUP; possibly Upper GI/pancreas)		YES	Old
123	Known primary tumour	Lung (NSCLC)		YES	Old
124	Known primary tumour	Lung (NSCLC)		NO	Not available
126	Known primary tumour	Lung (Carcinoid; atypical carcinoid)		YES	Old
127	Known primary tumour	Lung (NSCLC)		YES	Old
128	Known primary tumour	Cervix [previously Lung (NSCLC)]		YES	Old
131	Known primary tumour	Colorectum (Colon)		YES	Old
132	Known primary tumour	Lung (NSCLC)		YES	Old
136	Known primary tumour	Lung (NSCLC)		YES	Old
137	Known primary tumour	Ovary (Low grade serous carcinoma)		YES	Old
138	Known primary tumour	Ovary (Low grade serous carcinoma)		NO	Not available
140	Known primary tumour	Lung (NSCLC)		YES	Old
141	Known primary tumour	Lung (Carcinoid; atypical carcinoid)		YES	Old
142	Known primary tumour	Oesophagus/stomach (GEJ; adenocarcinoma)		YES	Old
143	Known primary tumour	Colorectum (Rectum)		YES	Old
144	Known primary tumour	Lung (NSCLC)		YES	Old
145	Known primary tumour	Oesophagus/stomach (Stomach; adenocarcinoma/sarcomatoid carcinoma)		YES	Old
149	Known primary tumour	Lung (NSCLC)		NO	Not available
150	Known primary tumour	Colorectum (Rectum)		YES	Old
153	Known primary tumour	Breast (ER positive, Her2 negative)		YES	Old
154	Known primary tumour	Lung (NSCLC)		YES	Old
155	Cancer of unknown primary	CUP (Oesophagus/stomach; Stomach; signet ring)		NO	Not available
156	Cancer of unknown primary	CUP (Lung; NSCLC)		YES	Old
157	Known primary tumour	Lung (NSCLC)		YES	Old
158	Known primary tumour	Soft tissue (Epidemic Kaposisarcoma)		NO	Not available
159	Known primary tumour	Lung (NSCLC)		NO	Not available
160	Known primary tumour	Thymus		YES	Old
161	Known primary tumour	Breast (TNBC)		YES	Old
162	Known primary tumour	Lung (NSCLC)		YES	Old
163	Known primary tumour	Brain/central nervous system (Olfactory neuroblastoma)		YES	Old
164	Known primary tumour	Lung (NSCLC)		YES	Old
167	Known primary tumour	Melanoma		YES	Old
168	Known primary tumour	Prostate		YES	Old
172	Known primary tumour	Lung (NSCLC)		YES	Old
173	Known primary tumour	Oesophagus/stomach (GEJ; adenocarcinoma)		YES	Old
174	Known primary tumour	GIST (Quadruple wildtype)		YES	Old
175	Known primary tumour	Lung (Carcinoid; atypical carcinoid)		YES	Old
176	Known primary tumour	Mesothelioma		YES	Old
177	Cancer of unknown primary	CUP (Bladder; UCC)		YES	Old
178	Known primary tumour	Lung (NSCLC)		YES	Old
179	Cancer of unknown primary	CUP (Lung; NSCLC)		YES	Old
182	Known primary tumour	Lung (NSCLC)		YES	Old
183	Known primary tumour	Mesothelioma		YES	Old
184	Known primary tumour	Mesothelioma		YES	Old
185	Cancer of unknown primary	CUP (Head and neck; SCC)		YES	Old
188	Known primary tumour	Breast (ER positive, Her2 positive)		YES	Old
189	Known primary tumour	Mesothelioma		YES	New
190	Known primary tumour	Mesothelioma		YES	Old
191	Known primary tumour	Lung (NSCLC)		YES	Old
193	Known primary tumour	Breast (ER positive, Her2 negative)		NO	Not available
194	Known primary tumour	Breast (ER positive, Her2 negative)		YES	Old
195	Known primary tumour	Mesothelioma		YES	Old
200	Known primary tumour	Mesothelioma		YES	Old
201	Known primary tumour	Oesophagus/stomach (Stomach)		YES	Old
202	Known primary tumour	Lung (NSCLC)		YES	Old
203	Known primary tumour	Ovary (High grade serous carcinoma)		YES	Old
204	Known primary tumour	Lung (NSCLC)		YES	Old
205	Cancer of unknown primary	CUP (Definitive CUP; possibly Ovary; mucinous adenocarcinoma)		YES	Old
206	Known primary tumour	Lung (Carcinoid; atypical carcinoid)		YES	Old
209	Known primary tumour	Lung (NSCLC)		YES	Old
210	Known primary tumour	Lung (Carcinoid; atypical carcinoid)		YES	Old
211	Cancer of unknown primary	CUP (Definitive CUP; possibly Lung; NSCLC)		YES	Old
215	Known primary tumour	Bone (Osteosarcoma)		YES	Old
216	Known primary tumour	Prostate		YES	Old	YES, new finding	ATM; biallelic, TVAF 100%
217	Known primary tumour	Soft tissue (High grade pleomorphic sarcoma)		NO	Not available
218	Known primary tumour	Lung (NSCLC)		YES	Old
219	Cancer of unknown primary	CUP (Lung; NSCLC)		YES	Old
220	Known primary tumour	Mesothelioma		YES	Old
221	Known primary tumour	Melanoma		YES	Old
222	Known primary tumour	Soft tissue (Clear cell sarcoma)		YES	Old
223	Known primary tumour	Colorectum (Rectum)		YES	Old
224	Known primary tumour	Prostate		YES	Old
225	Known primary tumour	Lung (NSCLC)		YES	Old
227	Cancer of unknown primary	CUP (Definitive CUP; possibly Head and neck; SCC)		YES	Old
228	Known primary tumour	Prostate		YES	Old
229	Known primary tumour	Lung (LCNEC)		NO	Not available
230	Known primary tumour	Prostate		YES	Old
231	Known primary tumour	Lung (NSCLC)		YES	Old
232	Known primary tumour	Colorectum (Rectum)		YES	Old
233	Known primary tumour	Colorectum (Colon)		YES	Old
234	Cancer of unknown primary	CUP (Definitive CUP; possibly Cervix; SCC)		YES	Old
235	Known primary tumour	Bladder (UCC)		YES	Old
236	Known primary tumour	Thymus		YES	Old
237	Cancer of unknown primary	CUP (Definitive CUP; possibly Upper GI)		YES	Old
238	Known primary tumour	Lung (NSCLC)		YES	Old
242	Known primary tumour	Lung (NSCLC)		YES	Old
243	Known primary tumour	Lung (NSCLC)		YES	Old
244	Known primary tumour	Lung (NSCLC)		YES	Old
249	Cancer of unknown primary	CUP (Definitive CUP; possibly Upper GI)		YES	Old
251	Cancer of unknown primary	CUP (Lung; NSCLC)		YES	Old
253	Known primary tumour	Ovary		YES	Old
254	Known primary tumour	Prostate		YES	Old
255	Known primary tumour	Mesothelioma		NO	Not available
256	Cancer of unknown primary	CUP (Lung; NSCLC)		YES	Old
257	Known primary tumour	Mesothelioma		YES	Old
259	Known primary tumour	Lung (Carcinoid; typical carcinoid)		YES	Old
260	Cancer of unknown primary	CUP (Ovary)		YES	Old	YES, new finding	BRCA1; biallelic, TVAF 97%
261	Known primary tumour	Ovary (High grade serous carcinoma)		NO	Not available
262	Known primary tumour	Lung (NSCLC)		YES	Old
263	Known primary tumour	Breast (ER positive, Her2 negative)		YES	Old
266	Cancer of unknown primary	CUP (Skin adnex)		YES	Old
267	Known primary tumour	Breast (TNBC)		YES	Old
268	Cancer of unknown primary	CUP (Breast; TNBC)		YES	Old
269	Known primary tumour	Prostate		YES	Old
271	Known primary tumour	Breast (ER positive, Her2 negative)		YES	Old
272	Cancer of unknown primary	CUP (Skin; Merkel cell carcinoma)		YES	Old
273	Known primary tumour	Breast (TNBC) [previously Lung (SCLC)]		YES	Old
274	Known primary tumour	Lung (NSCLC)		YES	Old
275	Known primary tumour	Lung (NSCLC)		YES	Old	YES, new finding	CHEK2; biallelic, TVAF 91%
277	Known primary tumour	Mesothelioma		YES	Old
278	Known primary tumour	Uterus/endometrium		YES	Old
282	Known primary tumour	Soft tissue (Alveolar soft part sarcoma)		YES	Old
283	Cancer of unknown primary	CUP (Definitive CUP; possibly Lung; NSCLC; carcinosarcoma)		YES	Old
284	Cancer of unknown primary	CUP (Pancreas)		YES	Old
285	Known primary tumour	Melanoma		YES	Old
286	Known primary tumour	Mesothelioma		YES	Old
290	Known primary tumour	Lung (NSCLC)		NO	Not available
291	Known primary tumour	Lung (NSCLC)		YES	Old
292	Known primary tumour	Lung (NSCLC)		YES	Old
293	Known primary tumour	Lung (NSCLC)		YES	Old
294	Known primary tumour	Lung (LCNEC)		YES	Old
296	Known primary tumour	Bladder (UCC)		NO	Not available
297	Cancer of unknown primary	CUP (Oesophagus/stomach)		YES	Old
298	Known primary tumour	Urinary tract (UCC)		NO	Not available
300	Cancer of unknown primary	CUP (Pancreas)		YES	Old
301	Known primary tumour	Urinary tract		NO	Not available
302	Known primary tumour	Lung (NSCLC)		YES	Old
304	Known primary tumour	Lung (NSCLC)		YES	Old
305	Known primary tumour	Prostate		NO	Not available
306	Known primary tumour	Lung (NSCLC)		YES	Old
307	Known primary tumour	Lung (NSCLC)		YES	Old
308	Known primary tumour	Lung (NSCLC)		YES	Old
309	Known primary tumour	Lung (NSCLC)		YES	Old
310	Known primary tumour	Prostate		YES	Old
311	Known primary tumour	Colorectum (Colon)		YES	Old
313	Known primary tumour	Head and neck (SCC)		YES	Old
314	Known primary tumour	Mesothelioma		YES	New
315	Known primary tumour	Lung (NSCLC)		YES	Old
317	Known primary tumour	Mesothelioma		YES	Old	YES, new finding	BRCA2; biallelic, TVAF 79%
319	Known primary tumour	Soft tissue (Spindle cell sarcoma)		YES	Old
321	Known primary tumour	Lung (Carcinoid; typical carcinoid)		NO	Not available
322	Known primary tumour	Colorectum (Sigmoid)		YES	Old
324	Known primary tumour	Breast (ER positive, Her2 negative)		YES	Old
328	Known primary tumour	Lung (NSCLC)		YES	Old
329	Known primary tumour	Colorectum (Colon)		YES	Old
330	Known primary tumour	Breast (TNBC)		YES	Old
333	Known primary tumour	Mesothelioma		YES	Old
334	Known primary tumour	Breast (TNBC)		YES	Old	YES, new finding	BRCA2; biallelic, TVAF 100%
335	Known primary tumour	Mesothelioma		YES	Old
336	Known primary tumour	Lung (NSCLC)		YES	Old
337	Known primary tumour	Breast (ER positive, Her2 negative)		YES	Old
338	Known primary tumour	Lung (NSCLC)		YES	Old
339	Known primary tumour	Lung (NSCLC)		YES	Old
340	Known primary tumour	Lung (NSCLC)		YES	Old
341	Known primary tumour	Bladder (UCC)		NO	Not available
342	Known primary tumour	Ovary (Extraovarial carcinoma)		YES	Old
344	Known primary tumour	Mesothelioma		YES	New
345	Known primary tumour	Lung (NSCLC)		YES	Old
347	Known primary tumour	Breast (TNBC)		YES	Old
349	Known primary tumour	Oesophagus/stomach (Stomach; mixed type carcinoma)		YES	Old
351	Known primary tumour	Lung (NSCLC)		NO	Not available
354	Known primary tumour	Soft tissue (Leiomyosarcoma)		YES	Old
355	Known primary tumour	Lung (NSCLC)		YES	Old
356	Known primary tumour	Oesophagus/stomach (GEJ)		YES	Old
357	Cancer of unknown primary	CUP (Definitive CUP; possibly Anogenital; SCC)		YES	Old
359	Known primary tumour	Oesophagus/stomach (Oesophagus)		YES	Old
361	Known primary tumour	Lung (NSCLC)		YES	Old
363	Known primary tumour	Lung (NSCLC)		YES	Old
364	Known primary tumour	Lung (NSCLC)		YES	Old
368	Known primary tumour	Lung (Carcinoid; atypical carcinoid)		YES	Old
369	Known primary tumour	Mesothelioma		YES	Old
371	Known primary tumour	Breast (ER positive, Her2 negative)		YES	Old
372	Known primary tumour	Uterus/endometrium		YES	Old
373	Known primary tumour	Oesophagus/stomach (Oesophagus)		YES	Old
374	Known primary tumour	Breast (TNBC)		YES	Old
376	Known primary tumour	Colorectum (Sigmoid)		YES	Old
377	Known primary tumour	Lung (SCLC transformed)		YES	Old
378	Known primary tumour	Breast (TNBC)		YES	Old
379	Known primary tumour	Cervix		YES	Old
380	Known primary tumour	Breast (ER positive, Her2 negative)		YES	Old	YES, new finding	CHEK2; biallelic, TVAF 100%
381	Cancer of unknown primary	CUP (Definitive CUP; possibly Ovary)		YES	Old
384	Known primary tumour	Lung (NSCLC)		YES	Old
385	Known primary tumour	Small intestine (Duodenum)		YES	Old	YES, already known	MLH1; mono-allelic	Not in regular report due to no somatic second hit detected, but as somatic second hit is likely present due to MSI, still considered biallelic
386	Known primary tumour	Soft tissue (Epithelioid sarcoma)		YES	Old
388	Known primary tumour	Cervix		YES	Old
389	Known primary tumour	Prostate		YES	Old
392	Known primary tumour	Lung (NSCLC)		YES	Old
393	Known primary tumour	Lung (NSCLC)		YES	Old
395	Cancer of unknown primary	CUP (Definitive CUP; possibly Urinary tract)		YES	Old
396	Known primary tumour	Urinary tract (Urethra)		YES	Old
397	Cancer of unknown primary	CUP (Definitive CUP; possibly Urinary tract)		YES	Old
398	Known primary tumour	Uterus/endometrium		YES	Old
399	Known primary tumour	Mesothelioma		YES	Old
404	Known primary tumour	Colorectum (Sigmoid)		YES	Old
405	Known primary tumour	Lung (NSCLC)		YES	Old
406	Known primary tumour	Lung (Carcinoid; atypical carcinoid)		YES	Old
407	Known primary tumour	Breast (TNBC)		YES	Old
408	Known primary tumour	Breast (TNBC)		YES	Old
409	Known primary tumour	Breast (ER positive, Her2 negative)		YES	Old
410	Known primary tumour	Lung (Carcinoid; atypical carcinoid)		YES	Old
411	Known primary tumour	Uterus/endometrium		YES	Old
412	Known primary tumour	Lung (NSCLC)		YES	Old
413	Known primary tumour	Ovary (Low grade serous carcinoma)		YES	Old
415	Known primary tumour	Urinary tract		YES	Old
418	Known primary tumour	Lung (NSCLC)		YES	Old
420	Cancer of unknown primary	CUP (Prostate)		YES	Old
421	Known primary tumour	Prostate		YES	Old
422	Known primary tumour	Soft tissue (Myxoid liposarcoma)		YES	Old
423	Known primary tumour	Colorectum (Colon)		YES	Old
424	Known primary tumour	Oesophagus/stomach (Stomach)		YES	New
425	Known primary tumour	Lung (NSCLC)		YES	Old
427	Known primary tumour	Soft tissue (Leiomyosarcoma)		YES	Old
428	Known primary tumour	Mesothelioma		YES	Old
430	Known primary tumour	Oesophagus/stomach (GEJ; signet ring)		YES	Old
431	Known primary tumour	Breast (ER positive, Her2 positive)		YES	Old
433	Known primary tumour	Pancreas		YES	Old
434	Known primary tumour	Breast (TNBC)		YES	Old
436	Known primary tumour	Lung (NSCLC)		YES	Old
437	Known primary tumour	Ovary		YES	Old
438	Known primary tumour	Brain/central nervous system (Glioblastoma Multiforme)		NO	Not available
439	Known primary tumour	Lung (NSCLC)		YES	Old
440	Known primary tumour	Pancreas (neuro-endocrine; NEC)		YES	Old
441	Known primary tumour	Head and neck (Oropharynx)		YES	Old
442	Cancer of unknown primary	CUP (Skin; SCC)		NO	Not available
443	Known primary tumour	Lung (NSCLC)		YES	Old
444	Cancer of unknown primary	CUP (Definitive CUP; possibly Upper GI)		YES	Old
445	Known primary tumour	Lung (NSCLC)		YES	Old
446	Cancer of unknown primary	CUP (Lung; SCLC)		YES	Old	YES, already known	TP53; biallelic, TVAF 100%
447	Known primary tumour	Lung (NSCLC)		YES	Old
448	Known primary tumour	Mesothelioma		YES	Old
449	Known primary tumour	Lung (NSCLC)		YES	Old	YES, new finding	BRCA2; biallelic, TVAF 100%
450	Known primary tumour	Soft tissue (Angiosarcoma)		YES	Old
453	Known primary tumour	Soft tissue (Rhabdomyosarcoma)		YES	Old
454	Known primary tumour	Breast (ER positive, Her2 negative)		YES	Old
455	Known primary tumour	Colorectum (Colon)		YES	Old
456	Known primary tumour	Prostate		YES	Old
458	Known primary tumour	Oesophagus/stomach (Oesophagus) [previously Sarcoma (SBRC)]		YES	Old
459	Known primary tumour	Prostate		YES	Old
460	Known primary tumour	Breast (ER positive, Her2 negative)		YES	Old
463	Known primary tumour	Soft tissue (Rhabdomyosarcoma)		YES	Old
464	Known primary tumour	Brain/central nervous system (Glioblastoma Multiforme)		YES	New
465	Known primary tumour	Soft tissue (Angiosarcoma)		YES	Old
466	Known primary tumour	Lung (NSCLC)		YES	Old
467	Known primary tumour	Mesothelioma		YES	New	YES, already known	BRCA2; biallelic, TVAF 100%
469	Known primary tumour	Urinary tract (UCC)		YES	Old
471	Known primary tumour	Ovary		YES	Old
472	Known primary tumour	Pancreas		YES	Old
473	Known primary tumour	Lung (NSCLC)		YES	Old
474	Known primary tumour	Uterus/endometrium		YES	New
476	Known primary tumour	Lung (NSCLC)		YES	Old
477	Known primary tumour	Soft tissue (Liposarcoma)		YES	New
480	Known primary tumour	Cervix (SCC)		YES	Old
481	Known primary tumour	Oesophagus/stomach (GEJ)		YES	Old
484	Known primary tumour	Breast (ER positive, Her2 negative)		YES	Old
485	Known primary tumour	Soft tissue (Leiomyosarcoma)		YES	Old
486	Known primary tumour	Ovary		YES	Old
487	Cancer of unknown primary	CUP (Definitive CUP; possibly Biliary tract)		YES	Old
488	Cancer of unknown primary	CUP (Definitive CUP; possibly Anogenital)		YES	Old
489	Known primary tumour	Colorectum (Colon)		YES	Old
490	Known primary tumour	Lung (NSCLC)		YES	Old
491	Known primary tumour	Lung (Carcinoid; atypical carcinoid)		YES	Old
494	Known primary tumour	Soft tissue (Liposarcoma)		YES	New
495	Cancer of unknown primary	CUP (Kidney; RCC)		YES	Old
496	Known primary tumour	Colorectum (Colon)		YES	Old
497	Known primary tumour	Prostate		YES	Old
498	Known primary tumour	Breast (ER positive, Her2 negative)		YES	Old
499	Known primary tumour	Lung (NSCLC)		YES	Old
500	Cancer of unknown primary	CUP (Definitive CUP; possibly Small intestine; duodenum)		NO	Not available
501	Known primary tumour	Lung (NSCLC)		YES	Old
502	Known primary tumour	Lung (NSCLC)		YES	New
503	Known primary tumour	Soft tissue (Myxoid liposarcoma)		YES	New
507	Known primary tumour	Skin (SCC)		YES	New
508	Known primary tumour	Ovary (Low grade serous carcinoma)		YES	Old
509	Cancer of unknown primary	CUP (Skin; SCC)		YES	New
510	Known primary tumour	Soft tissue (Leiomyosarcoma)		YES	New
511	Known primary tumour	Penis		YES	New
513	Cancer of unknown primary	CUP (Oesophagus/stomach)		YES	New
514	Known primary tumour	Urinary tract (UCC)		YES	Old	YES, new finding	BRCA1; biallelic, TVAF 100%
515	Known primary tumour	Soft tissue (Synoviosarcoma)		YES	New
516	Known primary tumour	Soft tissue (Liposarcoma)		YES	New
517	Known primary tumour	Lung (NSCLC)		YES	New
519	Known primary tumour	Soft tissue (Liposarcoma)		YES	New
520	Cancer of unknown primary	CUP (Definitive CUP; possibly Teratoma; dedifferentiated_		YES	New
522	Known primary tumour	Lung (NSCLC)		YES	New
523	Known primary tumour	Lung (NSCLC)		YES	Old
524	Known primary tumour	Breast (ER positive, Her2 negative)		YES	New
525	Known primary tumour	Prostate		YES	New
526	Cancer of unknown primary	CUP (Definitive CUP; possibly Upper GI)		YES	New
527	Known primary tumour	Lung (NSCLC)		YES	New
528	Known primary tumour	Bladder (UCC)		YES	New
529	Cancer of unknown primary	CUP (Definitive CUP; possibly Upper GI/thymus)		YES	New
530	Known primary tumour	Mesothelioma		YES	New
531	Cancer of unknown primary	CUP (Lung; NSCLC)		YES	New
532	Known primary tumour	Lung (NSCLC)		YES	New
533	Known primary tumour	Soft tissue (Sarcoma NOS)		YES	New
534	Known primary tumour	Uterus/endometrium		YES	New
535	Known primary tumour	Prostate		NO	Not available
536	Known primary tumour	Testis (Non-seminoma)		YES	New	YES, already known	CHEK2; mono-allelic, TVAF 53%
538	Known primary tumour	Colorectum (Sigmoid)		NO	Not available
539	Known primary tumour	Lung (NSCLC)		YES	New
540	Cancer of unknown primary	CUP (Lung; NSCLC)		YES	New
542	Cancer of unknown primary	CUP (Biliary tract)		YES	New
543	Cancer of unknown primary	CUP (Colorectum; Colon)		YES	New	YES, new finding	CHEK2; biallelic, TVAF 100%
544	Known primary tumour	Lung (NSCLC)		YES	New
546	Known primary tumour	Bladder (UCC)		YES	New
547	Known primary tumour	Colorectum (Rectum)		YES	New
548	Known primary tumour	Lung (NSCLC)		YES	New
549	Known primary tumour	Cervix		NO	Not available
550	Known primary tumour	Oesophagus/stomach (Stomach)		YES	New
551	Cancer of unknown primary	CUP (Pancreas)		YES	New
552	Cancer of unknown primary	CUP (Biliary tract)		YES	New
553	Known primary tumour	Soft tissue (Fibromyxoid sarcoma)		YES	New
554	Known primary tumour	Breast (TNBC)		YES	New
556	Known primary tumour	Lung (NSCLC)		YES	New
557	Known primary tumour	Brain/central nervous system (Glioblastoma Multiforme)		YES	New
558	Known primary tumour	Lung (NSCLC)		YES	New
559	Cancer of unknown primary	CUP (Lung; NSCLC)		YES	New
562	Known primary tumour	Colorectum (Sigmoid)		YES	New
565	Known primary tumour	Soft tissue (Liposarcoma)		YES	New
566	Known primary tumour	Breast (ER positive, Her2 negative)		YES	New
567	Known primary tumour	Breast (ER positive, Her2 positive)		YES	New	YES, new finding	CHEK2; biallelic, TVAF 100%
570	Known primary tumour	Mesothelioma		YES	New
571	Known primary tumour	Bladder (UCC)		YES	New
572	Known primary tumour	Breast (ER positive, Her2 negative)		YES	New	YES, new finding	CHEK2; biallelic, TVAF 100%
573	Known primary tumour	Urinary tract (UCC)		YES	New
574	Known primary tumour	Uterus/endometrium		YES	New
575	Known primary tumour	Soft tissue (Leiomyosarcoma)		YES	New
580	Known primary tumour	Breast (TNBC)		YES	New
581	Known primary tumour	Ovary (Granulosa cell carcinoma)		YES	New	YES, new finding	CHEK2; mono-allelic, TVAF 35%
582	Known primary tumour	Lung (NSCLC)		YES	New
583	Known primary tumour	Lung (NSCLC)		YES	Old
584	Cancer of unknown primary	CUP (Definitive CUP; possibly Colorectum)		YES	Old
585	Known primary tumour	Lung (NSCLC)		YES	New
586	Known primary tumour	Head and neck (Oropharynx; BCC)		YES	New
589	Cancer of unknown primary	CUP (Lung; NSCLC)		YES	New
590	Known primary tumour	Lung (NSCLC)		YES	Old
591	Known primary tumour	Lung (NSCLC)		YES	New
592	Known primary tumour	Colorectum (Rectum)		YES	New
594	Known primary tumour	Head and neck (Nasopharynx; SCC)		YES	New
595	Cancer of unknown primary	CUP (Definitive CUP; possibly Anogenital)		YES	New
596	Known primary tumour	Prostate		YES	New
597	Known primary tumour	Lung (NSCLC)		YES	New
598	Known primary tumour	Prostate		YES	New
599	Known primary tumour	Prostate		YES	New
600	Known primary tumour	Breast (TNBC)		YES	New
601	Known primary tumour	Cervix		YES	New
602	Known primary tumour	Soft tissue (Epithelioid haemangioendothelioma)		YES	New
603	Known primary tumour	Anus (SCC)		YES	New
604	Known primary tumour	Prostate		YES	New
605	Known primary tumour	Colorectum (Caecum)		YES	New
606	Known primary tumour	Urinary tract (UCC)		YES	New
608	Known primary tumour	Lung (NSCLC)		YES	New
609	Known primary tumour	Mesothelioma		YES	New
610	Known primary tumour	Oesophagus/stomach (GEJ; intestinal type carcinoma)		YES	New
611	Known primary tumour	Soft tissue (Leiomyosarcoma)		YES	New
612	Known primary tumour	Breast (TNBC)		YES	New
613	Known primary tumour	Breast (ER positive, Her2 negative)		YES	New
615	Cancer of unknown primary	CUP (Lung; NSCLC)		YES	New	YES, new finding	PMS2; mono-allelic, TVAF 32%
616	Known primary tumour	Breast (ER positive, Her2 negative)		YES	New
617	Known primary tumour	Breast (ER positive, Her2 negative)		YES	New	YES, new finding	CHEK2; mono-allelic, TVAF 50%
618	Known primary tumour	Cervix		YES	New
619	Known primary tumour	Breast (ER positive, Her2 negative)		NO	Not available
620	Known primary tumour	Soft tissue (Leiomyosarcoma)		YES	New
621	Known primary tumour	Soft tissue (Leiomyosarcoma)		YES	New
623	Known primary tumour	Ovary (Borderline/low grade serous carcinoma)		YES	New
624	Known primary tumour	Lung (Carcinoid; atypical carcinoid)		YES	New
625	Cancer of unknown primary	CUP (Definitive CUP; possibly Pancreas)		YES	New
626	Cancer of unknown primary	CUP (Prostate)		YES	New
627	Known primary tumour	Bone (Osteosarcoma)		YES	New
628	Known primary tumour	Soft tissue (High grade spindle cell/pleomorphic sarcoma)		YES	New
630	Known primary tumour	Head and neck (Pharynx; SCC)		YES	New
631	Known primary tumour	Mesothelioma		YES	New
632	Known primary tumour	Breast (ER positive, Her2 negative)		YES	New
633	Known primary tumour	Breast (ER positive, Her2 negative)		YES	New
634	Cancer of unknown primary	CUP (Lung; NSCLC)		YES	New
637	Known primary tumour	Lung (NSCLC)		YES	New
638	Known primary tumour	Oesophagus/stomach (Oesophagus)		YES	New
639	Known primary tumour	Cervix (SCC)		YES	New
640	Known primary tumour	Ovary		YES	New
641	Known primary tumour	Breast (ER positive, Her2 negative)		YES	New
642	Known primary tumour	Breast (ER positive, Her2 negative)		YES	New
643	Cancer of unknown primary	CUP (Definitive CUP)		YES	New
645	Known primary tumour	Kidney (Chromophobic RCC)		YES	New
646	Known primary tumour	Prostate (Sarcomatoid carcinoma)		YES	New
647	Known primary tumour	Ovary (High grade serous carcinoma)		YES	New
648	Known primary tumour	Soft tissue (Spindle cell sarcoma)		YES	New
649	Known primary tumour	Breast (ER positive, Her2 positive)		YES	New
650	Known primary tumour	Pancreas (neuro-endocrine; NEC)		YES	New
651	Known primary tumour	Breast (ER positive, Her2 negative)		YES	New
652	Known primary tumour	Breast (Acinic cell TNBC)		YES	New
653	Cancer of unknown primary	CUP (Pancreas)		YES	New
654	Known primary tumour	Lung (SCLC)		YES	New
656	Known primary tumour	Lung (NSCLC)		YES	New
657	Known primary tumour	Breast (TNBC)		YES	New
658	Known primary tumour	Soft tissue (Desmoplastic small round cell tumour		YES	New
659	Cancer of unknown primary	CUP (Definitive CUP; possibly Bladder; signet ring)		YES	New
660	Known primary tumour	Soft tissue (Leiomyosarcoma)		YES	New
661	Known primary tumour	Soft tissue (Liposarcoma; dedifferentiated)		YES	New
662	Cancer of unknown primary	CUP (Skin; Merkel cell carcinoma)		YES	New
663	Known primary tumour	Soft tissue (Angiosarcoma)		YES	New
664	Known primary tumour	Soft tissue (Liposarcoma)		YES	New
665	Known primary tumour	Ovary (High grade papillary serous carcinoma)		YES	New
666	Known primary tumour	Mesothelioma		YES	New
669	Known primary tumour	Urinary tract (UCC)		YES	New
670	Known primary tumour	Lung (NSCLC)		YES	New
671	Known primary tumour	Breast (ER negative, Her2 positive)		YES	New
672	Known primary tumour	Breast (TNBC)		YES	New
673	Cancer of unknown primary	CUP (Definitive CUP; possibly Ovary; high grade serous carcinoma)		YES	New
674	Known primary tumour	Penis		YES	New
676	Known primary tumour	Lung (NSCLC)		YES	New
677	Known primary tumour	Kidney (RCC)		YES	New
678	Known primary tumour	Colorectum (Appendix)		YES	New
679	Known primary tumour	Breast (TNBC)		YES	New
680	Known primary tumour	Prostate (neuro-endocrine; NEC)		YES	New
681	Known primary tumour	Oesophagus/stomach (Oesophagus)		YES	New
682	Known primary tumour	Skin adnex (SCC)		YES	New
683	Known primary tumour	Cervix		YES	New
684	Known primary tumour	Teratoma (Immature extraovary teratoma)		YES	New
685	Known primary tumour	Breast (ER positive, Her2 negative)		YES	New
688	Known primary tumour	Lung (NSCLC)		YES	New
690	Known primary tumour	Soft tissue (Spindle cell sarcoma)		YES	New
692	Cancer of unknown primary	CUP (Definitive CUP; possibly Head and neck)		YES	New
693	Known primary tumour	Breast (TNBC)		YES	New
694	Known primary tumour	Breast (TNBC)		YES	New
696	Cancer of unknown primary	CUP (Definitive CUP; possibly Lower GI)		YES	New
698	Known primary tumour	Colorectum (Caecum; signet ring)		YES	New
699	Known primary tumour	Melanoma		YES	New
700	Known primary tumour	Ovary (High grade clear cell carcinoma)		YES	New
701	Cancer of unknown primary	CUP (Definitive CUP; possibly Prostate)		YES	New
703	Known primary tumour	Lung (NSCLC)		YES	New
704	Known primary tumour	Mesothelioma		YES	New
705	Known primary tumour	Liver (Atypical HCC)		YES	New
707	Cancer of unknown primary	CUP (Lung; NSCLC)		YES	New	YES, already known	BRCA1; biallelic, TVAF 100%
710	Known primary tumour	Oesophagus/stomach (Stomach)		YES	New
711	Known primary tumour	Lung (NSCLC)		YES	New
712	Cancer of unknown primary	CUP (Definitive CUP; possibly Breast)		YES	New	YES, new finding	BRCA1; biallelic, TVAF 88%
713	Known primary tumour	Soft tissue (Spindle cell sarcoma)		YES	New
714	Known primary tumour	Lung (NSCLC)		YES	New
715	Cancer of unknown primary	CUP (Lung; NSCLC)		YES	New
716	Known primary tumour	Prostate		YES	New
717	Known primary tumour	Ovary (Serous/papillary borderline carcinoma)		YES	New
718	Known primary tumour	Lung (Carcinoid; atypical carcinoid)		YES	New	YES, already known	MEN1; biallelic, TVAF unknown
721	Known primary tumour	Breast (ER positive, Her2 negative)		YES	New
722	Known primary tumour	Lung (NSCLC)		YES	New	YES, already known	ATM; biallelic, TVAF 76%
723	Known primary tumour	Breast (TNBC)		YES	New
724	Known primary tumour	Lung (LCNEC)		YES	New
725	Known primary tumour	Lung (Carcinoid; atypical carcinoid)		YES	New
726	Known primary tumour	Prostate		YES	New
727	Known primary tumour	Lung (Carcinoid; atypical carcinoid)		YES	New
728	Known primary tumour	Colorectum (Colon)		YES	New
729	Cancer of unknown primary	CUP (Colorectum; Colon)		YES	New
730	Known primary tumour	Lung (NSCLC)		YES	New
732	Cancer of unknown primary	CUP (Lung; NSCLC)		YES	New
733	Known primary tumour	Uterus/endometrium		YES	New	YES, new finding	RAD51D; biallelic, TVAF 100%
734	Known primary tumour	Cervix		YES	New
737	Cancer of unknown primary	CUP (Definitive CUP; possibly Uterus/endometrium)		YES	New
739	Known primary tumour	Thyroid (Medullary carcinoma)		YES	New
741	Known primary tumour	Oesophagus/stomach (Oesophagus)		YES	New
743	Known primary tumour	Breast (ER positive, Her2 negative)		YES	New
744	Known primary tumour	Soft tissue (Sarcoma NOS)		YES	New
745	Known primary tumour	Mesothelioma		YES	New
746	Known primary tumour	Lung (NSCLC)		YES	New
747	Known primary tumour	Soft tissue (Leiomyosarcoma)		YES	New	YES, new finding	TP53; biallelic, TVAF 100%
748	Cancer of unknown primary	CUP (Breast; TNBC)		YES	New
750	Cancer of unknown primary	CUP (Definitive CUP; Signet ring)		YES	New
751	Cancer of unknown primary	CUP (Definitive CUP; SCC)		YES	New
752	Known primary tumour	Melanoma (Mucosal)		YES	New
753	Cancer of unknown primary	CUP (Definitive CUP; possibly Lung; NSCLC)		YES	New
754	Known primary tumour	Uterus/endometrium		YES	New
755	Known primary tumour	Breast (TNBC)		YES	New
756	Known primary tumour	Lung (NSCLC)		YES	New
757	Known primary tumour	Breast (TNBC)		YES	New
758	Known primary tumour	Ovary		YES	New
759	Known primary tumour	Breast (ER positive, Her2 negative)		YES	New
760	Known primary tumour	Soft tissue (Angiosarcoma)		YES	New
761	Known primary tumour	Lung (NSCLC)		YES	New
762	Known primary tumour	Colorectum (Colon)		YES	New
763	Known primary tumour	Soft tissue (Leiomyosarcoma)		YES	New	YES, already known	RB1; biallelic, TVAF 99%
764	Known primary tumour	Breast (ER positive, Her2 negative)		YES	New
765	Known primary tumour	Lung (NSCLC)		YES	New
767	Known primary tumour	Skin (SCC)		YES	New
768	Cancer of unknown primary	CUP (Lung; NSCLC)		YES	New
769	Known primary tumour	Cervix [previously Lung (NSCLC)]		YES	New
770	Known primary tumour	Soft tissue (Leiomyosarcoma)		YES	New	YES, already known	BRCA2; biallelic, TVAF 92%
772	Known primary tumour	Soft tissue (Pleomorphic liposarcoma)		YES	New
773	Cancer of unknown primary	CUP (Definitive CUP; possibly Lung; NSCLC)		YES	New
776	Known primary tumour	Soft tissue (Sarcoma NOS)		YES	New
777	Cancer of unknown primary	CUP (Biliary tract)		YES	New
779	Known primary tumour	Bladder (UCC)		YES	New
781	Known primary tumour	Breast (TNBC)		YES	New
783	Known primary tumour	Breast (ER positive, Her2 positive)		YES	New
784	Cancer of unknown primary	CUP (Definitive CUP; possibly Lower GI)		YES	New
785	Known primary tumour	Bladder (UCC)		YES	New
786	Known primary tumour	Lung (NSCLC)		YES	New
787	Known primary tumour	Pancreas (neuro-endocrine; NET)		YES	New	YES, already known	MEN1; biallelic, TVAF 94%
788	Known primary tumour	Bladder (UCC)		YES	New
790	Known primary tumour	Lung (NSCLC)		YES	New
792	Known primary tumour	Colorectum (Colon)		YES	New
795	Known primary tumour	Head and neck (Nasopharynx; SCC)		YES	New
796	Known primary tumour	Lung (NSCLC)		YES	New
797	Known primary tumour	Head and neck (Oropharynx)		YES	New
799	Known primary tumour	Colorectum (Colon)		YES	New
800	Cancer of unknown primary	CUP (Lung; NSCLC)		YES	New
801	Known primary tumour	Ovary		YES	New
803	Known primary tumour	Lung (NSCLC)		YES	New
804	Known primary tumour	Lung (NSCLC)		YES	New
806	Known primary tumour	Soft tissue (Spindle cell sarcoma)		YES	New
807	Cancer of unknown primary	CUP (Penis)		YES	New
809	Known primary tumour	Pancreas		YES	New
810	Known primary tumour	Mesothelioma		YES	New
811	Known primary tumour	Soft tissue (Myxoid liposarcoma)		YES	New
812	Known primary tumour	Soft tissue (Liposarcoma)		YES	New
813	Known primary tumour	Salivary gland		YES	New
814	Known primary tumour	Colorectum (Appendix; goblet cell)		YES	New
815	Cancer of unknown primary	CUP (Colorectum)		YES	New
818	Known primary tumour	Soft tissue (Low grade sarcoma)		YES	New
819	Known primary tumour	GIST		YES	New
820	Known primary tumour	Soft tissue (Spindle cell/pleomorphic sarcoma)		YES	New	YES, new finding	MSH6; mono-allelic, TVAF 50%
821	Known primary tumour	Oesophagus/stomach (GEJ; adenocarcinoma)		YES	New
823	Cancer of unknown primary	CUP (Cervix)		YES	New
824	Known primary tumour	Prostate		YES	New
826	Known primary tumour	Breast (Angiosarcoma)		YES	New
827	Known primary tumour	Soft tissue (Sarcoma NOS)		YES	New
828	Cancer of unknown primary	CUP (Lung; NSCLC)		YES	New
829	Known primary tumour	Breast (ER positive, Her2 negative)		YES	New	YES, already known	BRCA2; mono-allelic, TVAF 53%	Mono-allelic, but due to HRD and somatic second hit considered biallelic
832	Known primary tumour	Bone (Osteosarcoma)		YES	New
833	Known primary tumour	Breast (ER positive, Her2 negative)		YES	New
834	Known primary tumour	Urinary tract		YES	New
835	Cancer of unknown primary	CUP (Lung; SCLC)		YES	New
836	Known primary tumour	Soft tissue (Leiomyosarcoma)		YES	New
838	Known primary tumour	Soft tissue (Pleomorphic sarcoma NOS)		YES	New
840	Known primary tumour	Lung (NSCLC)		YES	New
841	Cancer of unknown primary	CUP (Lung; NSCLC)		YES	New
842	Cancer of unknown primary	CUP (Skin; BCC)		YES	New
843	Cancer of unknown primary	CUP (Colorectum; neuro-endocrine; NEC)		YES	New
844	Known primary tumour	Lung (NSCLC)		YES	New
845	Known primary tumour	Prostate		YES	New
848	Cancer of unknown primary	CUP (Lung; NSCLC)		YES	New
849	Cancer of unknown primary	CUP (Skin; SCC)		YES	New
850	Cancer of unknown primary	CUP (Lung; NSCLC)		YES	New
851	Cancer of unknown primary	CUP (Lung; NSCLC)		YES	New
852	Cancer of unknown primary	CUP (Definitive CUP; possibly Pancreas)		YES	New
857	Cancer of unknown primary	CUP (Colorectum)		YES	New
858	Cancer of unknown primary	CUP (Pancreas; neuro-endocrine; NEC)		YES	New
861	Known primary tumour	Myeloproliferative neoplasm [previously Colorectum (Sigmoid)]		YES	New
866	Known primary tumour	Lung (NSCLC)		YES	New	YES, already known	BRCA2; biallelic, TVAF 100%
867	Known primary tumour	Prostate		YES	New	YES, new finding	BRCA1; biallelic, TVAF 99%
868	Known primary tumour	Vulva		YES	New	YES, new finding	BRCA1; mono-allelic, TVAF 39%
869	Known primary tumour	Soft tissue (Fibrosarcoma)		YES	New
870	Known primary tumour	Biliary tract		YES	New
871	Known primary tumour	Lung (NSCLC)		YES	New
872	Cancer of unknown primary	CUP (Skin; SCC)		YES	New
873	Known primary tumour	Breast (TNBC)		YES	New
874	Cancer of unknown primary	CUP (Ovary; SCC)		YES	New
875	Known primary tumour	Breast (ER positive, Her2 negative)		YES	New
880	Known primary tumour	Oesophagus/stomach (Oesophagus; radiation-induced sarcomatoid carcinoma)		YES	New
882	Known primary tumour	Lung (NSCLC)		YES	New
883	Known primary tumour	Ovary (High grade serous carcinoma)		YES	New
884	Known primary tumour	GIST		YES	New
885	Known primary tumour	Skin (SCC)		YES	New
887	Cancer of unknown primary	CUP (Oesophagus/stomach; Oesophagus)		YES	New
888	Cancer of unknown primary	CUP (Definitive CUP; possibly Pancreas; neuro-endocrine; LCNEC)		YES	New
889	Known primary tumour	Lung (Carcinoid; atypical carcinoid)		YES	New
890	Known primary tumour	Lung (NSCLC)		YES	New
891	Known primary tumour	Lung (Carcinoid; atypical carcinoid)		YES	New
892	Cancer of unknown primary	CUP (Definitive CUP; possibly Lower GI)		YES	New
894	Cancer of unknown primary	CUP (Lung; NSCLC)		YES	New
895	Known primary tumour	Lung (Carcinoid; atypical carcinoid)		YES	New
896	Known primary tumour	Urinary tract		YES	New
897	Cancer of unknown primary	CUP (Ovary)		YES	New
898	Known primary tumour	Urinary tract		YES	New
899	Known primary tumour	Benign tumour (Leiomyoma)		YES	New
900	Known primary tumour	Colorectum (Colon)		YES	New
901	Known primary tumour	Urachus		YES	New
902	Cancer of unknown primary	CUP (Biliary tract)		YES	New
903	Cancer of unknown primary	CUP (Lung; NSCLC)		YES	New
904	Known primary tumour	Colorectum (Rectum)		YES	New
905	Known primary tumour	Lung (NSCLC)		YES	New
907	Known primary tumour	Melanoma [previously Soft tissue (spindle cell)]		YES	New
908	Cancer of unknown primary	CUP (Skin adnex; sebaceous gland cell)		YES	New
909	Cancer of unknown primary	CUP (Lung; SCLC)		YES	New
910	Known primary tumour	Soft tissue (Nerve sheath sarcoma)		YES	New
911	Known primary tumour	Lung (Carcinoid; atypical carcinoid)		YES	New
912	Known primary tumour	Soft tissue (Leiomyosarcoma)		YES	New
913	Cancer of unknown primary	CUP (Breast; TNBC)		YES	New
914	Known primary tumour	Breast (ER positive, Her2 negative)		YES	New
915	Known primary tumour	Uterus/endometrium		YES	New
917	Known primary tumour	Prostate		YES	New	YES, new finding	PALB2; mono-allelic, TVAF 45%
918	Known primary tumour	Penis		YES	New
919	Known primary tumour	Head and neck (SCC)		YES	New
922	Known primary tumour	Lung (NSCLC)		YES	New
923	Known primary tumour	Soft tissue (sarcoma NOS)		YES	New
925	Known primary tumour	Soft tissue (Spindle cell sarcoma)		YES	New
926	Cancer of unknown primary	CUP (Definitive CUP; possibly Anogenital; SCC)		YES	New
927	Known primary tumour	Urinary tract (UCC)		YES	New
928	Known primary tumour	Testis (Seminoma)		YES	New
929	Cancer of unknown primary	CUP (Biliary tract; adenocarcinoma)		YES	New
931	Known primary tumour	Penis		YES	New
932	Known primary tumour	Lung (NSCLC)		YES	New
934	Known primary tumour	Ovary (Low grade serous carcinoma)		YES	New
936	Known primary tumour	Colorectum (Sigmoid)		YES	New
937	Known primary tumour	Colorectum (Appendix; mucinous adenocarcinoma)		YES	New
938	Known primary tumour	Colorectum (Colon)		YES	New
939	Known primary tumour	Soft tissue (Leiomyosarcoma)		YES	New
940	Known primary tumour	Ovary (High grade adenocarcinoma)		YES	New	YES, already known	BRCA1; biallelic, TVAF 91%
941	Known primary tumour	Soft tissue (Leiomyosarcoma)		YES	New
943	Cancer of unknown primary	CUP (Mesothelioma)		YES	New
944	Known primary tumour	Soft tissue (Spindle cell sarcoma)		YES	New
945	Known primary tumour	Lung (NSCLC)		YES	New
946	Known primary tumour	Lung (NSCLC)		YES	New
949	Known primary tumour	Thymus		YES	New
952	Known primary tumour	Lung (NSCLC)		YES	New	YES, already known	BRCA2; mono-allelic; allele lost in tumour	Confirmed present in germline
953	Known primary tumour	Soft tissue (Spindle cell sarcoma)		YES	New
954	Known primary tumour	Soft tissue (Liposarcoma)		YES	New
956	Cancer of unknown primary	CUP (Skin; Merkel cell carcinoma)		YES	New
958	Known primary tumour	Soft tissue (Radiation-induced breast sarcoma)		YES	New
959	Known primary tumour	Soft tissue (Spindle cell sarcoma)		YES	New
960	Known primary tumour	Colorectum (Caecum)		YES	New
961	Known primary tumour	Lung (NSCLC)		YES	New
962	Known primary tumour	Brain/central nervous system (Esthesioneuroblastoma)		YES	New
963	Known primary tumour	Kidney (Papillary RCC)		YES	New
965	Known primary tumour	Prostate		YES	New
966	Cancer of unknown primary	CUP (Definitive CUP; possibly Small intestine)		YES	New
967	Known primary tumour	Mesothelioma		YES	New
968	Known primary tumour	Bone (Chondrosarcoma)		YES	New
969	Known primary tumour	Colorectum (Rectum)		YES	New
973	Known primary tumour	Kidney (Oncocytoma)		YES	New
974	Known primary tumour	Kidney (Oncocytoma)		YES	New
975	Known primary tumour	Soft tissue (Uterine sarcoma)		YES	New
976	Known primary tumour	Colorectum (Colon)		YES	New
977	Known primary tumour	Ovary (High grade serous carcinoma)		YES	New
979	Cancer of unknown primary	CUP (Definitive CUP; possibly Small intestine; neuro-endocrine; NEC)		YES	New
980	Known primary tumour	Lung (NSCLC)		YES	New

## Sheet: Supp T5. Diagnostic revision
Sample ID	Prior diagnosis (with additional information)	New diagnosis after WGS	Remarks from histopathology file
128	Lung (NSCLC)	Cervix	Carcinoma with HPV type 16
273	Lung (SCLC)	Breast	Small cell neuro-endocrine carcinoma
458	Soft tissue (small blue round cell tumour)	Oesophagus/stomach	Carcinoma with loss of keratin expression
769	Lung (NSCLC)	Cervix	Carcinoma with HPV type 16 and aberrant TTF-1 expression
861	Colorectum (sigmoid; adenocarcinoma, MMR proficient)	Myeloproliferative neoplasm	Extramedullary plasmacytoma
907	Soft tissue (spindle cell/pleiomorphic sarcoma)	Melanoma

## Sheet: Supp T6. Clinical utility
Sample ID	Diagnosis category		Reimbursed care biomarker present	Pathogenic germline alteration present	WGS-based CUP prediction algorithm solution or improved existing diagnosis		Any clinically relevant result?
1	Known primary tumour		0	0	1		1
2	Known primary tumour		1	0	0		1
3	Known primary tumour		1	0	0		1
5	Known primary tumour		0	0	0		0
7	Cancer of unknown primary		0	0	1		1
8	Known primary tumour		0	1	0		1
9	Known primary tumour		1	0	0		1
12	Cancer of unknown primary		1	0	1		1
14	Cancer of unknown primary		0	0	0		0
16	Known primary tumour		0	0	0		0
17	Known primary tumour		0	0	0		0
18	Known primary tumour		0	0	0		0
20	Known primary tumour		0	0	0		0
21	Known primary tumour		1	0	0		1
22	Known primary tumour		0	0	0		0
23	Cancer of unknown primary		0	0	1		1
26	Cancer of unknown primary		1	1	1		1
27	Known primary tumour		1	0	0		1
28	Known primary tumour		1	0	0		1
30	Known primary tumour		1	0	0		1
32	Cancer of unknown primary		0	0	1		1
33	Known primary tumour		1	1	0		1
34	Cancer of unknown primary		0	0	1		1
35	Known primary tumour		0	0	0		0
36	Known primary tumour		1	0	0		1
41	Cancer of unknown primary		0	0	0		0
42	Known primary tumour		0	0	0		0
44	Known primary tumour		0	0	0		0
45	Known primary tumour		0	0	0		0
47	Known primary tumour		1	1	0		1
49	Known primary tumour		0	0	0		0
50	Known primary tumour		1	0	0		1
51	Known primary tumour		0	0	0		0
52	Known primary tumour		0	0	0		0
53	Known primary tumour		0	0	0		0
54	Known primary tumour		0	0	0		0
55	Known primary tumour		0	0	0		0
56	Known primary tumour		0	0	0		0
57	Known primary tumour		0	0	0		0
58	Known primary tumour		0	0	0		0
59	Known primary tumour		0	0	0		0
61	Known primary tumour		0	0	0		0
63	Known primary tumour		1	0	0		1
64	Known primary tumour		1	0	0		1
65	Known primary tumour		0	0	0		0
67	Known primary tumour		0	1	0		1
68	Known primary tumour		0	0	0		0
69	Known primary tumour		0	0	0		0
71	Known primary tumour		0	0	0		0
73	Known primary tumour		0	0	0		0
74	Known primary tumour		0	0	0		0
75	Known primary tumour		0	0	0		0
76	Known primary tumour		1	0	0		1
77	Known primary tumour		0	0	0		0
78	Known primary tumour		0	0	0		0
79	Known primary tumour		0	0	0		0
80	Known primary tumour		0	0	0		0
81	Known primary tumour		1	0	0		1
83	Known primary tumour		0	0	1		1
84	Known primary tumour		0	1	0		1
85	Known primary tumour		0	0	0		0
86	Known primary tumour		0	0	0		0
87	Cancer of unknown primary		0	0	1		1
88	Cancer of unknown primary		0	0	0		0
90	Cancer of unknown primary		1	0	0		1
91	Known primary tumour		0	0	1		1
92	Cancer of unknown primary		0	0	0		0
93	Known primary tumour		0	0	0		0
94	Cancer of unknown primary		0	0	1		1
96	Known primary tumour		0	1	0		1
97	Known primary tumour		0	0	0		0
98	Known primary tumour		0	1	0		1
99	Known primary tumour		0	0	1		1
100	Known primary tumour		1	0	0		1
101	Known primary tumour		0	0	1		1
103	Known primary tumour		0	0	1		1
104	Known primary tumour		1	0	0		1
106	Known primary tumour		0	0	0		0
107	Known primary tumour		1	0	0		1
108	Known primary tumour		0	0	0		0
109	Known primary tumour		1	1	0		1
110	Known primary tumour		0	0	0		0
111	Known primary tumour		0	0	0		0
112	Known primary tumour		0	0	0		0
113	Known primary tumour		1	0	0		1
114	Known primary tumour		0	1	0		1
115	Known primary tumour		0	0	1		1
116	Known primary tumour		0	0	0		0
117	Known primary tumour		0	0	0		0
120	Known primary tumour		0	0	0		0
121	Cancer of unknown primary		0	0	0		0
123	Known primary tumour		0	0	0		0
124	Known primary tumour		0	0	0		0
126	Known primary tumour		0	0	0		0
127	Known primary tumour		1	0	0		1
128	Known primary tumour		0	0	1		1
131	Known primary tumour		0	0	0		0
132	Known primary tumour		1	0	0		1
136	Known primary tumour		0	0	0		0
137	Known primary tumour		0	0	0		0
138	Known primary tumour		0	0	0		0
140	Known primary tumour		1	0	0		1
141	Known primary tumour		0	0	0		0
142	Known primary tumour		0	0	0		0
143	Known primary tumour		1	0	0		1
144	Known primary tumour		0	0	0		0
145	Known primary tumour		0	0	1		1
149	Known primary tumour		0	0	0		0
150	Known primary tumour		1	0	0		1
153	Known primary tumour		1	0	0		1
154	Known primary tumour		0	0	0		0
155	Cancer of unknown primary		0	0	1		1
156	Cancer of unknown primary		0	0	1		1
157	Known primary tumour		1	0	0		1
158	Known primary tumour		0	0	0		0
159	Known primary tumour		1	0	0		1
160	Known primary tumour		0	0	0		0
161	Known primary tumour		0	0	0		0
162	Known primary tumour		1	0	0		1
163	Known primary tumour		0	0	0		0
164	Known primary tumour		0	0	0		0
167	Known primary tumour		1	0	0		1
168	Known primary tumour		0	0	0		0
172	Known primary tumour		1	0	0		1
173	Known primary tumour		1	0	0		1
174	Known primary tumour		0	0	0		0
175	Known primary tumour		1	0	0		1
176	Known primary tumour		0	0	0		0
177	Cancer of unknown primary		0	0	1		1
178	Known primary tumour		1	0	0		1
179	Cancer of unknown primary		1	0	1		1
182	Known primary tumour		0	0	0		0
183	Known primary tumour		0	0	0		0
184	Known primary tumour		0	0	0		0
185	Cancer of unknown primary		0	0	1		1
188	Known primary tumour		0	0	0		0
189	Known primary tumour		0	0	0		0
190	Known primary tumour		0	0	0		0
191	Known primary tumour		1	0	0		1
193	Known primary tumour		1	0	0		1
194	Known primary tumour		1	0	0		1
195	Known primary tumour		0	0	0		0
200	Known primary tumour		0	0	0		0
201	Known primary tumour		0	0	0		0
202	Known primary tumour		1	0	0		1
203	Known primary tumour		0	0	0		0
204	Known primary tumour		0	0	0		0
205	Cancer of unknown primary		0	0	0		0
206	Known primary tumour		0	0	0		0
209	Known primary tumour		0	0	0		0
210	Known primary tumour		0	0	0		0
211	Cancer of unknown primary		0	0	0		0
215	Known primary tumour		0	0	0		0
216	Known primary tumour		0	1	0		1
217	Known primary tumour		0	0	0		0
218	Known primary tumour		1	0	0		1
219	Cancer of unknown primary		0	0	1		1
220	Known primary tumour		0	0	0		0
221	Known primary tumour		0	0	0		0
222	Known primary tumour		0	0	0		0
223	Known primary tumour		1	0	0		1
224	Known primary tumour		0	0	0		0
225	Known primary tumour		1	0	0		1
227	Cancer of unknown primary		0	0	0		0
228	Known primary tumour		1	0	0		1
229	Known primary tumour		0	0	0		0
230	Known primary tumour		0	0	0		0
231	Known primary tumour		1	0	0		1
232	Known primary tumour		1	0	0		1
233	Known primary tumour		1	0	0		1
234	Cancer of unknown primary		0	0	0		0
235	Known primary tumour		0	0	0		0
236	Known primary tumour		0	0	0		0
237	Cancer of unknown primary		0	0	0		0
238	Known primary tumour		0	0	0		0
242	Known primary tumour		0	0	0		0
243	Known primary tumour		0	0	0		0
244	Known primary tumour		1	0	0		1
249	Cancer of unknown primary		0	0	0		0
251	Cancer of unknown primary		0	0	1		1
253	Known primary tumour		0	0	0		0
254	Known primary tumour		1	0	0		1
255	Known primary tumour		0	0	0		0
256	Cancer of unknown primary		0	0	1		1
257	Known primary tumour		0	0	0		0
259	Known primary tumour		0	0	0		0
260	Cancer of unknown primary		1	1	1		1
261	Known primary tumour		0	0	0		0
262	Known primary tumour		1	0	0		1
263	Known primary tumour		0	0	0		0
266	Cancer of unknown primary		0	0	1		1
267	Known primary tumour		0	0	0		0
268	Cancer of unknown primary		0	0	1		1
269	Known primary tumour		0	0	0		0
271	Known primary tumour		0	0	0		0
272	Cancer of unknown primary		0	0	1		1
273	Known primary tumour		0	0	1		1
274	Known primary tumour		1	0	0		1
275	Known primary tumour		1	1	0		1
277	Known primary tumour		0	0	0		0
278	Known primary tumour		0	0	0		0
282	Known primary tumour		0	0	0		0
283	Cancer of unknown primary		0	0	0		0
284	Cancer of unknown primary		0	0	1		1
285	Known primary tumour		1	0	1		1
286	Known primary tumour		0	0	0		0
290	Known primary tumour		1	0	0		1
291	Known primary tumour		1	0	0		1
292	Known primary tumour		0	0	0		0
293	Known primary tumour		0	0	0		0
294	Known primary tumour		0	0	0		0
296	Known primary tumour		0	0	0		0
297	Cancer of unknown primary		0	0	1		1
298	Known primary tumour		0	0	0		0
300	Cancer of unknown primary		0	0	1		1
301	Known primary tumour		1	0	0		1
302	Known primary tumour		1	0	0		1
304	Known primary tumour		1	0	0		1
305	Known primary tumour		0	0	0		0
306	Known primary tumour		0	0	0		0
307	Known primary tumour		0	0	0		0
308	Known primary tumour		0	0	0		0
309	Known primary tumour		0	0	0		0
310	Known primary tumour		0	0	0		0
311	Known primary tumour		1	0	0		1
313	Known primary tumour		0	0	0		0
314	Known primary tumour		0	0	0		0
315	Known primary tumour		1	0	0		1
317	Known primary tumour		0	1	0		1
319	Known primary tumour		0	0	0		0
321	Known primary tumour		0	0	0		0
322	Known primary tumour		1	0	0		1
324	Known primary tumour		0	0	0		0
328	Known primary tumour		1	0	0		1
329	Known primary tumour		1	0	0		1
330	Known primary tumour		0	0	0		0
333	Known primary tumour		0	0	0		0
334	Known primary tumour		1	1	0		1
335	Known primary tumour		0	0	1		1
336	Known primary tumour		1	0	0		1
337	Known primary tumour		1	0	0		1
338	Known primary tumour		1	0	0		1
339	Known primary tumour		0	0	0		0
340	Known primary tumour		1	0	0		1
341	Known primary tumour		0	0	0		0
342	Known primary tumour		0	0	0		0
344	Known primary tumour		0	0	0		0
345	Known primary tumour		1	0	0		1
347	Known primary tumour		0	0	0		0
349	Known primary tumour		0	0	0		0
351	Known primary tumour		0	0	0		0
354	Known primary tumour		0	0	0		0
355	Known primary tumour		1	0	0		1
356	Known primary tumour		0	0	0		0
357	Cancer of unknown primary		0	0	0		0
359	Known primary tumour		1	0	0		1
361	Known primary tumour		1	0	0		1
363	Known primary tumour		1	0	0		1
364	Known primary tumour		1	0	0		1
368	Known primary tumour		0	0	0		0
369	Known primary tumour		0	0	0		0
371	Known primary tumour		0	0	0		0
372	Known primary tumour		0	0	0		0
373	Known primary tumour		0	0	0		0
374	Known primary tumour		0	0	0		0
376	Known primary tumour		1	0	0		1
377	Known primary tumour		0	0	0		0
378	Known primary tumour		0	0	0		0
379	Known primary tumour		0	0	0		0
380	Known primary tumour		0	1	0		1
381	Cancer of unknown primary		0	0	0		0
384	Known primary tumour		0	0	0		0
385	Known primary tumour		0	1	0		1
386	Known primary tumour		0	0	0		0
388	Known primary tumour		0	0	0		0
389	Known primary tumour		0	0	0		0
392	Known primary tumour		0	0	0		0
393	Known primary tumour		1	0	0		1
395	Cancer of unknown primary		0	0	0		0
396	Known primary tumour		0	0	0		0
397	Cancer of unknown primary		0	0	0		0
398	Known primary tumour		0	0	0		0
399	Known primary tumour		0	0	0		0
404	Known primary tumour		1	0	0		1
405	Known primary tumour		1	0	0		1
406	Known primary tumour		0	0	0		0
407	Known primary tumour		0	0	0		0
408	Known primary tumour		0	0	0		0
409	Known primary tumour		0	0	0		0
410	Known primary tumour		0	0	0		0
411	Known primary tumour		0	0	0		0
412	Known primary tumour		1	0	0		1
413	Known primary tumour		0	0	0		0
415	Known primary tumour		0	0	0		0
418	Known primary tumour		0	0	0		0
420	Cancer of unknown primary		0	0	1		1
421	Known primary tumour		0	0	0		0
422	Known primary tumour		0	0	0		0
423	Known primary tumour		1	0	0		1
424	Known primary tumour		0	0	0		0
425	Known primary tumour		1	0	0		1
427	Known primary tumour		0	0	0		0
428	Known primary tumour		0	0	0		0
430	Known primary tumour		0	0	0		0
431	Known primary tumour		1	0	0		1
433	Known primary tumour		0	0	0		0
434	Known primary tumour		0	0	0		0
436	Known primary tumour		0	0	0		0
437	Known primary tumour		0	0	0		0
438	Known primary tumour		0	0	0		0
439	Known primary tumour		1	0	0		1
440	Known primary tumour		0	0	0		0
441	Known primary tumour		0	0	0		0
442	Cancer of unknown primary		0	0	1		1
443	Known primary tumour		0	0	0		0
444	Cancer of unknown primary		0	0	0		0
445	Known primary tumour		1	0	0		1
446	Cancer of unknown primary		0	1	1		1
447	Known primary tumour		1	0	0		1
448	Known primary tumour		0	0	0		0
449	Known primary tumour		1	1	0		1
450	Known primary tumour		0	0	0		0
453	Known primary tumour		0	0	0		0
454	Known primary tumour		1	0	0		1
455	Known primary tumour		0	0	0		0
456	Known primary tumour		0	0	0		0
458	Known primary tumour		0	0	1		1
459	Known primary tumour		0	0	0		0
460	Known primary tumour		1	0	0		1
463	Known primary tumour		0	0	0		0
464	Known primary tumour		0	0	0		0
465	Known primary tumour		0	0	0		0
466	Known primary tumour		1	0	0		1
467	Known primary tumour		0	1	0		1
469	Known primary tumour		0	0	0		0
471	Known primary tumour		0	0	0		0
472	Known primary tumour		0	0	0		0
473	Known primary tumour		1	0	0		1
474	Known primary tumour		0	0	0		0
476	Known primary tumour		1	0	0		1
477	Known primary tumour		0	0	0		0
480	Known primary tumour		0	0	0		0
481	Known primary tumour		1	0	0		1
484	Known primary tumour		1	0	0		1
485	Known primary tumour		0	0	0		0
486	Known primary tumour		0	0	0		0
487	Cancer of unknown primary		0	0	0		0
488	Cancer of unknown primary		0	0	0		0
489	Known primary tumour		1	0	0		1
490	Known primary tumour		1	0	0		1
491	Known primary tumour		0	0	0		0
494	Known primary tumour		0	0	0		0
495	Cancer of unknown primary		0	0	1		1
496	Known primary tumour		1	0	0		1
497	Known primary tumour		0	0	0		0
498	Known primary tumour		1	0	0		1
499	Known primary tumour		1	0	0		1
500	Cancer of unknown primary		0	0	0		0
501	Known primary tumour		0	0	0		0
502	Known primary tumour		1	0	0		1
503	Known primary tumour		0	0	0		0
507	Known primary tumour		0	0	0		0
508	Known primary tumour		0	0	0		0
509	Cancer of unknown primary		0	0	1		1
510	Known primary tumour		0	0	0		0
511	Known primary tumour		0	0	0		0
513	Cancer of unknown primary		0	0	1		1
514	Known primary tumour		0	1	0		1
515	Known primary tumour		0	0	0		0
516	Known primary tumour		0	0	0		0
517	Known primary tumour		0	0	0		0
519	Known primary tumour		0	0	0		0
520	Cancer of unknown primary		0	0	0		0
522	Known primary tumour		1	0	0		1
523	Known primary tumour		1	0	0		1
524	Known primary tumour		1	0	0		1
525	Known primary tumour		0	0	0		0
526	Cancer of unknown primary		0	0	0		0
527	Known primary tumour		1	0	0		1
528	Known primary tumour		0	0	0		0
529	Cancer of unknown primary		1	0	0		1
530	Known primary tumour		0	0	0		0
531	Cancer of unknown primary		0	0	1		1
532	Known primary tumour		1	0	0		1
533	Known primary tumour		0	0	1		1
534	Known primary tumour		0	0	0		0
535	Known primary tumour		0	0	0		0
536	Known primary tumour		0	1	0		1
538	Known primary tumour		1	0	0		1
539	Known primary tumour		0	0	0		0
540	Cancer of unknown primary		0	0	1		1
542	Cancer of unknown primary		0	0	1		1
543	Cancer of unknown primary		1	1	1		1
544	Known primary tumour		1	0	0		1
546	Known primary tumour		0	0	0		0
547	Known primary tumour		1	0	0		1
548	Known primary tumour		0	0	0		0
549	Known primary tumour		0	0	0		0
550	Known primary tumour		0	0	0		0
551	Cancer of unknown primary		0	0	1		1
552	Cancer of unknown primary		0	0	1		1
553	Known primary tumour		0	0	0		0
554	Known primary tumour		0	0	0		0
556	Known primary tumour		1	0	0		1
557	Known primary tumour		0	0	0		0
558	Known primary tumour		1	0	0		1
559	Cancer of unknown primary		0	0	1		1
562	Known primary tumour		1	0	0		1
565	Known primary tumour		0	0	0		0
566	Known primary tumour		0	0	0		0
567	Known primary tumour		0	1	0		1
570	Known primary tumour		0	0	0		0
571	Known primary tumour		0	0	0		0
572	Known primary tumour		1	1	0		1
573	Known primary tumour		0	0	0		0
574	Known primary tumour		0	0	0		0
575	Known primary tumour		0	0	0		0
580	Known primary tumour		0	0	0		0
581	Known primary tumour		0	1	0		1
582	Known primary tumour		1	0	0		1
583	Known primary tumour		0	0	0		0
584	Cancer of unknown primary		1	0	0		1
585	Known primary tumour		1	0	0		1
586	Known primary tumour		1	0	0		1
589	Cancer of unknown primary		0	0	1		1
590	Known primary tumour		1	0	0		1
591	Known primary tumour		0	0	0		0
592	Known primary tumour		1	0	0		1
594	Known primary tumour		0	0	0		0
595	Cancer of unknown primary		0	0	0		0
596	Known primary tumour		0	0	0		0
597	Known primary tumour		0	0	0		0
598	Known primary tumour		0	0	0		0
599	Known primary tumour		0	0	0		0
600	Known primary tumour		0	0	0		0
601	Known primary tumour		0	0	0		0
602	Known primary tumour		0	0	0		0
603	Known primary tumour		0	0	0		0
604	Known primary tumour		0	0	0		0
605	Known primary tumour		1	0	0		1
606	Known primary tumour		0	0	0		0
608	Known primary tumour		0	0	0		0
609	Known primary tumour		0	0	0		0
610	Known primary tumour		0	0	0		0
611	Known primary tumour		0	0	0		0
612	Known primary tumour		0	0	0		0
613	Known primary tumour		1	0	0		1
615	Cancer of unknown primary		0	1	1		1
616	Known primary tumour		0	0	0		0
617	Known primary tumour		1	1	0		1
618	Known primary tumour		0	0	0		0
619	Known primary tumour		0	0	0		0
620	Known primary tumour		0	0	0		0
621	Known primary tumour		0	0	0		0
623	Known primary tumour		0	0	0		0
624	Known primary tumour		0	0	0		0
625	Cancer of unknown primary		0	0	0		0
626	Cancer of unknown primary		0	0	1		1
627	Known primary tumour		0	0	0		0
628	Known primary tumour		0	0	0		0
630	Known primary tumour		0	0	0		0
631	Known primary tumour		0	0	0		0
632	Known primary tumour		0	0	0		0
633	Known primary tumour		1	0	0		1
634	Cancer of unknown primary		0	0	1		1
637	Known primary tumour		1	0	0		1
638	Known primary tumour		1	0	0		1
639	Known primary tumour		0	0	0		0
640	Known primary tumour		0	0	0		0
641	Known primary tumour		0	0	0		0
642	Known primary tumour		1	0	0		1
643	Cancer of unknown primary		0	0	0		0
645	Known primary tumour		0	0	0		0
646	Known primary tumour		0	0	1		1
647	Known primary tumour		1	0	0		1
648	Known primary tumour		0	0	0		0
649	Known primary tumour		1	0	0		1
650	Known primary tumour		0	0	0		0
651	Known primary tumour		1	0	0		1
652	Known primary tumour		0	0	0		0
653	Cancer of unknown primary		0	0	1		1
654	Known primary tumour		0	0	0		0
656	Known primary tumour		1	0	0		1
657	Known primary tumour		0	0	0		0
658	Known primary tumour		0	0	1		1
659	Cancer of unknown primary		0	0	0		0
660	Known primary tumour		0	0	0		0
661	Known primary tumour		0	0	0		0
662	Cancer of unknown primary		0	0	1		1
663	Known primary tumour		0	0	0		0
664	Known primary tumour		0	0	0		0
665	Known primary tumour		0	0	0		0
666	Known primary tumour		0	0	0		0
669	Known primary tumour		0	0	0		0
670	Known primary tumour		1	0	0		1
671	Known primary tumour		1	0	0		1
672	Known primary tumour		0	0	0		0
673	Cancer of unknown primary		0	0	0		0
674	Known primary tumour		0	0	0		0
676	Known primary tumour		1	0	0		1
677	Known primary tumour		0	0	0		0
678	Known primary tumour		1	0	0		1
679	Known primary tumour		0	0	0		0
680	Known primary tumour		0	0	0		0
681	Known primary tumour		0	0	0		0
682	Known primary tumour		0	0	0		0
683	Known primary tumour		0	0	0		0
684	Known primary tumour		0	0	1		1
685	Known primary tumour		1	0	0		1
688	Known primary tumour		1	0	0		1
690	Known primary tumour		0	0	0		0
692	Cancer of unknown primary		0	0	0		0
693	Known primary tumour		0	0	0		0
694	Known primary tumour		0	0	0		0
696	Cancer of unknown primary		1	0	0		1
698	Known primary tumour		1	0	0		1
699	Known primary tumour		0	0	0		0
700	Known primary tumour		0	0	0		0
701	Cancer of unknown primary		0	0	0		0
703	Known primary tumour		0	0	0		0
704	Known primary tumour		0	0	0		0
705	Known primary tumour		0	0	0		0
707	Cancer of unknown primary		0	1	1		1
710	Known primary tumour		1	0	0		1
711	Known primary tumour		1	0	0		1
712	Cancer of unknown primary		0	1	0		1
713	Known primary tumour		0	0	0		0
714	Known primary tumour		0	0	0		0
715	Cancer of unknown primary		0	0	1		1
716	Known primary tumour		0	0	0		0
717	Known primary tumour		0	0	0		0
718	Known primary tumour		0	1	0		1
721	Known primary tumour		0	0	0		0
722	Known primary tumour		1	1	0		1
723	Known primary tumour		0	0	0		0
724	Known primary tumour		0	0	0		0
725	Known primary tumour		0	0	0		0
726	Known primary tumour		0	0	0		0
727	Known primary tumour		0	0	0		0
728	Known primary tumour		1	0	0		1
729	Cancer of unknown primary		1	0	1		1
730	Known primary tumour		0	0	0		0
732	Cancer of unknown primary		0	0	1		1
733	Known primary tumour		0	1	0		1
734	Known primary tumour		0	0	0		0
737	Cancer of unknown primary		0	0	0		0
739	Known primary tumour		0	0	0		0
741	Known primary tumour		0	0	0		0
743	Known primary tumour		1	0	0		1
744	Known primary tumour		0	0	0		0
745	Known primary tumour		0	0	0		0
746	Known primary tumour		0	0	1		1
747	Known primary tumour		0	1	1		1
748	Cancer of unknown primary		0	0	1		1
750	Cancer of unknown primary		0	0	0		0
751	Cancer of unknown primary		0	0	0		0
752	Known primary tumour		0	0	0		0
753	Cancer of unknown primary		1	0	0		1
754	Known primary tumour		0	0	0		0
755	Known primary tumour		0	0	0		0
756	Known primary tumour		1	0	0		1
757	Known primary tumour		0	0	0		0
758	Known primary tumour		0	0	0		0
759	Known primary tumour		0	0	0		0
760	Known primary tumour		0	0	0		0
761	Known primary tumour		0	0	0		0
762	Known primary tumour		1	0	0		1
763	Known primary tumour		0	1	0		1
764	Known primary tumour		0	0	0		0
765	Known primary tumour		1	0	0		1
767	Known primary tumour		1	0	0		1
768	Cancer of unknown primary		0	0	1		1
769	Known primary tumour		0	0	1		1
770	Known primary tumour		0	1	0		1
772	Known primary tumour		0	0	0		0
773	Cancer of unknown primary		0	0	0		0
776	Known primary tumour		0	0	0		0
777	Cancer of unknown primary		0	0	1		1
779	Known primary tumour		0	0	0		0
781	Known primary tumour		0	0	0		0
783	Known primary tumour		1	0	0		1
784	Cancer of unknown primary		1	0	0		1
785	Known primary tumour		0	0	0		0
786	Known primary tumour		1	0	0		1
787	Known primary tumour		0	1	1		1
788	Known primary tumour		0	0	0		0
790	Known primary tumour		1	0	0		1
792	Known primary tumour		1	0	0		1
795	Known primary tumour		0	0	0		0
796	Known primary tumour		1	0	0		1
797	Known primary tumour		0	0	0		0
799	Known primary tumour		1	0	0		1
800	Cancer of unknown primary		0	0	1		1
801	Known primary tumour		0	0	0		0
803	Known primary tumour		1	0	0		1
804	Known primary tumour		1	0	0		1
806	Known primary tumour		0	0	0		0
807	Cancer of unknown primary		0	0	1		1
809	Known primary tumour		0	0	0		0
810	Known primary tumour		0	0	0		0
811	Known primary tumour		0	0	0		0
812	Known primary tumour		0	0	0		0
813	Known primary tumour		0	0	0		0
814	Known primary tumour		1	0	0		1
815	Cancer of unknown primary		1	0	1		1
818	Known primary tumour		0	0	0		0
819	Known primary tumour		1	0	0		1
820	Known primary tumour		0	1	0		1
821	Known primary tumour		0	0	0		0
823	Cancer of unknown primary		0	0	1		1
824	Known primary tumour		0	0	0		0
826	Known primary tumour		0	0	0		0
827	Known primary tumour		0	0	1		1
828	Cancer of unknown primary		0	0	1		1
829	Known primary tumour		1	1	0		1
832	Known primary tumour		0	0	0		0
833	Known primary tumour		0	0	0		0
834	Known primary tumour		0	0	0		0
835	Cancer of unknown primary		0	0	1		1
836	Known primary tumour		0	0	0		0
838	Known primary tumour		0	0	0		0
840	Known primary tumour		1	0	0		1
841	Cancer of unknown primary		0	0	1		1
842	Cancer of unknown primary		1	0	1		1
843	Cancer of unknown primary		0	0	1		1
844	Known primary tumour		1	0	0		1
845	Known primary tumour		0	0	0		0
848	Cancer of unknown primary		0	0	1		1
849	Cancer of unknown primary		0	0	1		1
850	Cancer of unknown primary		0	0	1		1
851	Cancer of unknown primary		0	0	1		1
852	Cancer of unknown primary		0	0	0		0
857	Cancer of unknown primary		1	0	1		1
858	Cancer of unknown primary		0	0	1		1
861	Known primary tumour		0	0	1		1
866	Known primary tumour		1	1	0		1
867	Known primary tumour		1	1	0		1
868	Known primary tumour		0	1	0		1
869	Known primary tumour		0	0	0		0
870	Known primary tumour		0	0	0		0
871	Known primary tumour		0	0	0		0
872	Cancer of unknown primary		0	0	1		1
873	Known primary tumour		0	0	0		0
874	Cancer of unknown primary		0	0	1		1
875	Known primary tumour		0	0	0		0
880	Known primary tumour		0	0	1		1
882	Known primary tumour		1	0	0		1
883	Known primary tumour		0	0	0		0
884	Known primary tumour		0	0	0		0
885	Known primary tumour		0	0	0		0
887	Cancer of unknown primary		1	0	1		1
888	Cancer of unknown primary		0	0	0		0
889	Known primary tumour		1	0	0		1
890	Known primary tumour		1	0	0		1
891	Known primary tumour		1	0	0		1
892	Cancer of unknown primary		1	0	0		1
894	Cancer of unknown primary		0	0	1		1
895	Known primary tumour		0	0	0		0
896	Known primary tumour		0	0	0		0
897	Cancer of unknown primary		0	0	1		1
898	Known primary tumour		0	0	0		0
899	Known primary tumour		0	0	0		0
900	Known primary tumour		1	0	0		1
901	Known primary tumour		0	0	0		0
902	Cancer of unknown primary		0	0	1		1
903	Cancer of unknown primary		0	0	1		1
904	Known primary tumour		1	0	0		1
905	Known primary tumour		0	0	0		0
907	Known primary tumour		0	0	1		1
908	Cancer of unknown primary		0	0	1		1
909	Cancer of unknown primary		0	0	1		1
910	Known primary tumour		0	0	0		0
911	Known primary tumour		0	0	0		0
912	Known primary tumour		0	0	0		0
913	Cancer of unknown primary		0	0	1		1
914	Known primary tumour		0	0	0		0
915	Known primary tumour		0	0	0		0
917	Known primary tumour		0	1	0		1
918	Known primary tumour		0	0	0		0
919	Known primary tumour		0	0	0		0
922	Known primary tumour		1	0	0		1
923	Known primary tumour		0	0	0		0
925	Known primary tumour		0	0	0		0
926	Cancer of unknown primary		0	0	0		0
927	Known primary tumour		0	0	0		0
928	Known primary tumour		0	0	0		0
929	Cancer of unknown primary		0	0	1		1
931	Known primary tumour		0	0	0		0
932	Known primary tumour		1	0	0		1
934	Known primary tumour		0	0	0		0
936	Known primary tumour		1	0	0		1
937	Known primary tumour		1	0	0		1
938	Known primary tumour		0	0	0		0
939	Known primary tumour		0	0	0		0
940	Known primary tumour		1	1	0		1
941	Known primary tumour		0	0	0		0
943	Cancer of unknown primary		0	0	1		1
944	Known primary tumour		0	0	0		0
945	Known primary tumour		1	0	0		1
946	Known primary tumour		1	0	0		1
949	Known primary tumour		0	0	0		0
952	Known primary tumour		0	1	0		1
953	Known primary tumour		0	0	0		0
954	Known primary tumour		0	0	0		0
956	Cancer of unknown primary		0	0	1		1
958	Known primary tumour		0	0	0		0
959	Known primary tumour		0	0	0		0
960	Known primary tumour		1	0	0		1
961	Known primary tumour		0	0	0		0
962	Known primary tumour		0	0	0		0
963	Known primary tumour		0	0	0		0
965	Known primary tumour		0	0	0		0
966	Cancer of unknown primary		0	0	0		0
967	Known primary tumour		0	0	1		1
968	Known primary tumour		0	0	0		0
969	Known primary tumour		1	0	0		1
973	Known primary tumour		0	0	0		0
974	Known primary tumour		0	0	0		0
975	Known primary tumour		0	0	0		0
976	Known primary tumour		1	0	0		1
977	Known primary tumour		0	0	0		0
979	Cancer of unknown primary		0	0	0		0
980	Known primary tumour		0	0	0		0
